# Supplementary material for: Enantioselective construction of branched 1,3-dienyl substituted quaternary carbon stereocenters by asymmetric allenyl Claisen rearrangement
Source: Royal Society of Chemistry journal article supplement (doi:10.1039/c6cc06481g), 2016-01-01

## *Supporting Information*

# **Enantioselective Construction of Branched 1,3-Dienyl Substituted Quaternary Carbon Stereocenters by Asymmetric Allenyl Claisen Rearrangement**

Yangbin Liu, Haipeng Hu, Lili Lin, Xiaoyu Hao, Xiaohua Liu,\* Xiaoming Feng\*

|                                                                                 |           |
|---------------------------------------------------------------------------------|-----------|
| <b>I. General information.....</b>                                              | <b>2</b>  |
| <b>II. Procedure of allenyl vinyl ethers preparation .....</b>                  | <b>2</b>  |
| <b>III. Optimization of reaction condition .....</b>                            | <b>4</b>  |
| <b>IV. Procedure of catalytic asymmetric allenyl Claisen rearrangement.....</b> | <b>5</b>  |
| <b>V. Procedure for the transformation of the rearrangement product.....</b>    | <b>5</b>  |
| <b>VI. X-ray structure of compound 2g and E-4 .....</b>                         | <b>6</b>  |
| <b>VII. Proposed stereochemical model.....</b>                                  | <b>7</b>  |
| <b>VIII. Spectral data of typical substrate.....</b>                            | <b>8</b>  |
| <b>IX. Spectral data of rearrangement product .....</b>                         | <b>12</b> |
| <b>X. Copies of NMR spectral for substrate and product.....</b>                 | <b>29</b> |

## I. General information

$^1\text{H}$  NMR spectra were recorded on commercial instruments (400 MHz). Chemical shifts were reported in ppm from tetramethylsilane with the solvent resonance as the internal standard ( $\text{CDCl}_3$ ,  $\delta = 7.26$ ; DMSO,  $\delta = 2.49$ ). Spectra were reported as follows: chemical shift ( $\delta$  ppm), multiplicity (s = singlet, d = doublet, t = triplet, q = quartet, m = multiplet), coupling constants (Hz), integration and assignment.  $^{13}\text{C}$  NMR spectra were collected on commercial instruments (100 MHz) with complete proton decoupling. Chemical shifts are reported in ppm from the tetramethylsilane with the solvent resonance as internal standard ( $\text{CDCl}_3$ ,  $\delta = 77.0$ ; DMSO,  $\delta = 39.6$ ). Enantiomeric excesses (ee) were determined by HPLC analysis using the corresponding commercial chiralpak column as stated in the experimental procedures at 25 °C. Optical rotations were reported as follows:  $[\alpha]_D^T$  (c g/100 mL, in solvent). HRMS was recorded on a commercial apparatus (ESI Source). All reagents and solvents were obtained from commercial suppliers and used without further purification except as indicated below. All catalytic reactions were run in dried glassware. THF and toluene were distilled from sodium benzophenone ketyl.  $\text{CH}_2\text{Cl}_2$  and  $\text{CH}_2\text{ClCH}_2\text{Cl}$  were distilled over  $\text{CaH}_2$ .

## II. Procedure of allenyl vinyl ethers preparation

### 1) General procedure for the synthesis of the allenols

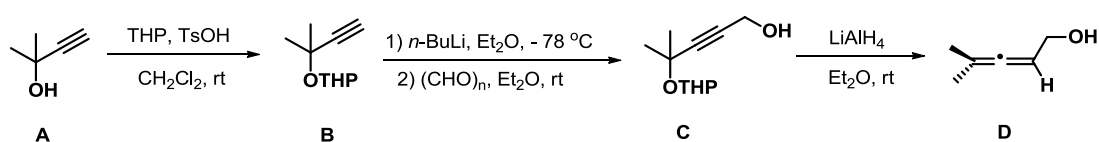

The procedures were further modified according to Giovanni Poli's report. Please see: A. Boutier, C. Kammerer-Pentier, N. Krause, G. Prestat, G. Poli, *Chem. Eur. J.* **2012**, *18*, 3840.

3,4-Dihydro-2H-pyran (1.1 equiv.) was added dropwise to a solution of 3-methylbut-1-yn-3-ol (1.0 equiv.) and *p*-toluenesulfonic acid (*p*-TSOH) (1 mol%) in dichloromethane (1 M). The resulting pink mixture was stirred at room temperature for 24 h and solid  $\text{K}_2\text{CO}_3$  was then introduced. Dichloromethane was evaporated under reduced pressure and the residue was purified.

*n*-Butyllithium (1.1 equiv., 2.5 M solution in hexanes) was added dropwise to a solution of protected propargyl alcohol (1.0 equiv.) in distilled diethyl ether (1 M), cooled to  $-78\text{ }^\circ\text{C}$ . The temperature of the solution was carefully maintained below  $-50\text{ }^\circ\text{C}$  during the addition. The reaction mixture was stirred at  $-78\text{ }^\circ\text{C}$  during 45 min and paraformaldehyde (3.0 equiv.) was then added. The reaction was vigorously stirred and allowed to slowly reach room temperature overnight. The reaction medium was smoothly quenched with a mixture of ice and water, and the aqueous layer was extracted with diethyl ether. The combined organic layers were washed with

brine, dried on  $\text{MgSO}_4$  and concentrated in vacuum. The crude product was purified by flash chromatography on silica gel.

Propargyl alcohol (1.0 equiv.) diluted in diethyl ether (1 M) was added dropwise to a suspension of powdered lithium and aluminium hydride  $\text{LiAlH}_4$  (3.0 equiv.) in distilled diethyl ether (0.25 M), cooled to  $0\text{ }^\circ\text{C}$ . The resulting reaction mixture was allowed to reach room temperature over 5 h (the completion of the reaction was monitored by  $^1\text{H}$  NMR). The excess lithium and aluminium hydride was hydrolyzed at  $0\text{ }^\circ\text{C}$  by adding successively water, an aqueous  $\text{NaOH}$  solution (15% w/w) and water again. The biphasic mixture was then stirred vigorously during 1 h. The resulting white suspension was filtered on celatom and washed several times with diethyl ether. The combined organic layers were dried on  $\text{Na}_2\text{SO}_4$  and concentrated in vacuum. The crude product was purified by flash chromatography on silica gel to afford the expected allenol.

## 2) General procedure for the synthesis of the allenyl vinyl ethers

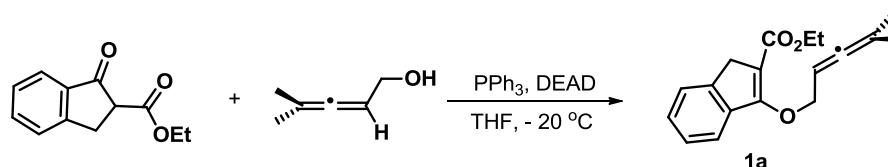

$\text{PPh}_3$  (7.5 mmol) was dissolved in THF (10 mL), and the solution was cooled to  $-20\text{ }^\circ\text{C}$ . DEAD (7.5 mmol), the allenic alcohol (6.0 mmol), and the  $\beta$ -ketoester (5.0 mmol) were added successively. The reaction was allowed to warm to room temperature over 2 h and continued stirring at room temperature until the  $\beta$ -ketoester was consumed as judged by TLC. Then, the reaction mixture was concentrated and chromatographed on  $\text{SiO}_2$  column using 2–5% ethyl acetate/petroleum ether to afford the allenyl vinyl ethers.

### III. Optimization of reaction condition

**Table S1:** Screen of organic solvent

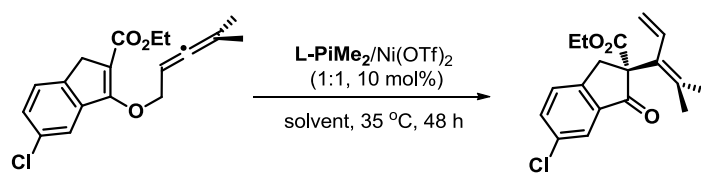

| Entry | solvent                         | isolated yield (%) | ee (%) |
|-------|---------------------------------|--------------------|--------|
| 1     | toluene                         | 12                 | 96     |
| 2     | CH <sub>2</sub> Cl <sub>2</sub> | 57                 | 99     |
| 3     | Et <sub>2</sub> O               | 40                 | 98     |
| 4     | THF                             | trace              | --     |
| 5     | CH <sub>3</sub> CN              | trace              | --     |

**Table S2:** Screen of metal precursors

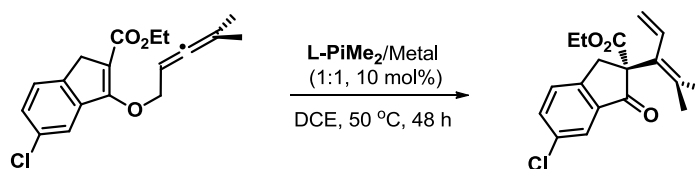

| Entry | metal                              | isolated yield (%) | ee (%) |
|-------|------------------------------------|--------------------|--------|
| 1     | Sc(OTf) <sub>3</sub>               | <5                 | 60     |
| 2     | Yb(OTf) <sub>3</sub>               | 35                 | 58     |
| 3     | Cu(OTf) <sub>2</sub>               | 10                 | 67     |
| 4     | NiCl <sub>2</sub>                  | trace              | --     |
| 5     | Ni(OAc) <sub>2</sub>               | trace              | --     |
| 6     | Ni(ClO <sub>4</sub> ) <sub>2</sub> | <5                 | 63     |

**Table S3:** Screen of catalyst loading and temperature

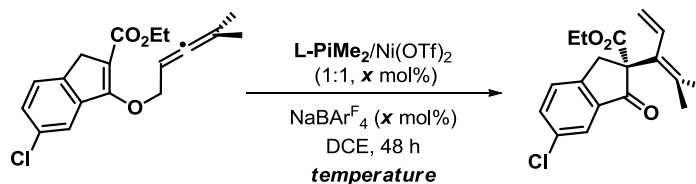

| Entry            | catalyst loading | temp. | isolated yield (%) | ee (%) |
|------------------|------------------|-------|--------------------|--------|
| 1 <sup>[a]</sup> | 10 mol%          | 50    | 80                 | 99     |
| 2                | 5 mol%           | 50    | 82                 | 86     |
| 3                | 3 mol%           | 50    | 84                 | 85     |
| 4                | 1 mol%           | 50    | 41                 | 80     |

|   |         |    |    |    |
|---|---------|----|----|----|
| 5 | 10 mol% | 35 | 54 | 95 |
| 6 | 10 mol% | 70 | 82 | 89 |

[a] The reaction mixture was stirred at 50 °C for 30 h.

#### IV. Procedure of catalytic asymmetric allenyl Claisen rearrangement

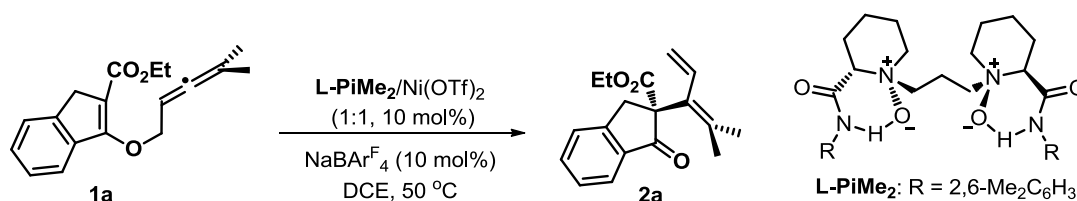

A dry reaction tube was charged with Ni(OTf)<sub>2</sub> (3.5 mg, 10 mol%), ligand **L-PiMe<sub>2</sub>** (5.3 mg, 10 mol%) and NaBAR<sub>4</sub><sup>F</sup> (8.8 mg, 10 mol%). Then CH<sub>2</sub>Cl<sub>2</sub> (0.5 mL) was added and the mixture was stirred at 35 °C for 0.5 h. After removing CH<sub>2</sub>Cl<sub>2</sub> from tube under vacuum, the substrate **1a** (0.1 mmol) and CH<sub>2</sub>ClCH<sub>2</sub>Cl (1.0 mL) was added. The reaction mixture continued stirring at 50 °C for the indicated time. The residue was purified by flash chromatography on silica gel (1/15, EA/petroleum ether) to afford the desired product **2a**.

#### V. Procedure for the transformation of the rearrangement product

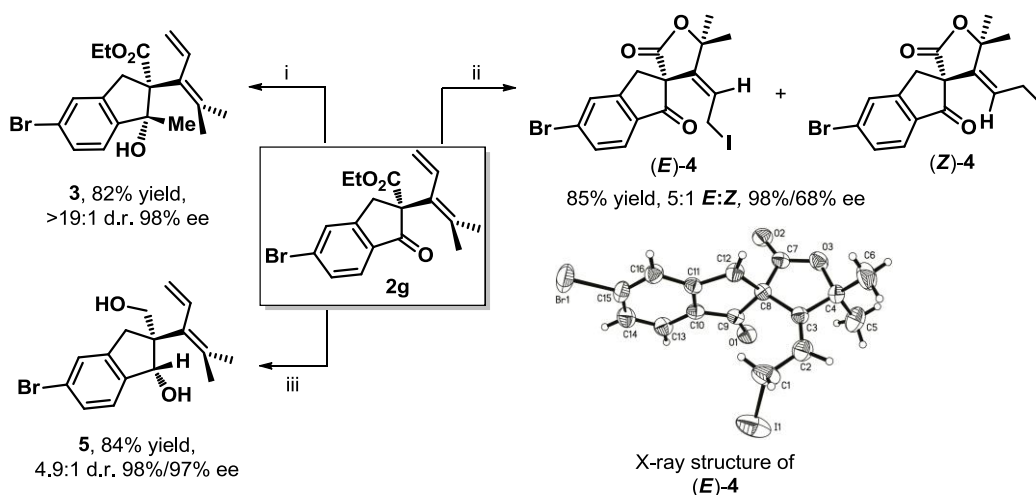

For compound **3**: To a flame-dried tube were charged with **2g** (0.1 mmol) and Et<sub>2</sub>O (2.0 mL) under nitrogen atmosphere. The mixture was stirred at 0 °C and MeMgBr (0.4 mL, 1 M in THF) was added slowly. The reaction was allowed to warm to room temperature over 2 h and continued stirring at room temperature until the starting material was consumed as judged by TLC. The reaction was quenched with water and the aqueous layer was extracted with diethyl ether. The

combined organic layers were washed with brine, dried on Na<sub>2</sub>SO<sub>4</sub> and concentrated in vacuum. The crude product was purified by flash chromatography on silica gel eluting with PE/EA = 10/1 to afford the product **3** in 82% yield with 19:1 d.r., 98% ee.

For compound **4**: The rearrangement product **2g** (25 mg, 0.07 mmol) was dissolved in CHCl<sub>3</sub> (1.0 mL) in a flame-dried tube. The reaction vessel was covered with foil and iodine (52.5 mg, 3.0 eq) was added. After stirring for 24 h at room temperature, the reaction mixture was diluted with CH<sub>2</sub>Cl<sub>2</sub> and washed with Na<sub>2</sub>S<sub>2</sub>O<sub>3</sub> (aq) and brine. The organic phase was dried over Na<sub>2</sub>SO<sub>4</sub>, filtered, and concentrated. The crude reaction mixture was isolated via column chromatography with PE/EA = 7/1 to give spiro lactone **4** in 85% yield. And the product **4** was analyzed by <sup>1</sup>H NMR and shown to be a 5:1 mixture of *E/Z*-isomers. The mixture was recrystallized from Et<sub>2</sub>O/PE to obtain single crystal for X-ray analysis. Based on the crystal structure, the major isomer was determined to be *E*-configuration.

For compound **5**: To a solution of **2g** (0.1 mmol) in toluene (0.5 mL) was added DIBAL-H (0.6 mmol, 1.2 M in toluene) at -78 °C. After ambient temperature was reached, the reaction mixture was stirred overnight. The mixture was diluted with water and 1 M HCl (aq) to get weak-acidic solution. The aqueous layer was extracted with CH<sub>2</sub>Cl<sub>2</sub> (3×10 mL) and the combined organic layers were washed with brine, dried over anhydrous Na<sub>2</sub>SO<sub>4</sub> and concentrated and purified through flash chromatograph (PE/EA = 4/1) to give 1,3-diol **5** (84% yield, 4.9:1 d.r., 98%/97% ee).

## VI. X-ray structure of compound **2g** and *E*-**4**

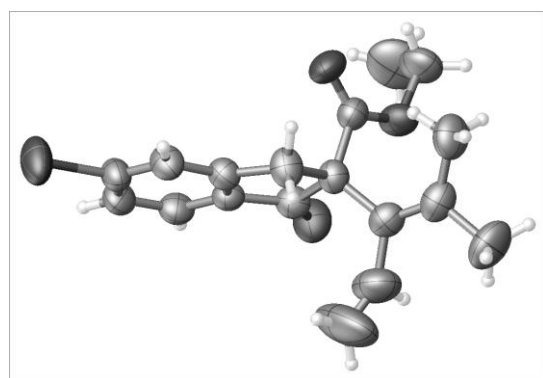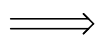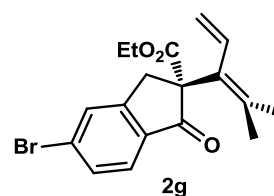

(*R*)-ethyl 5-bromo-2-(4-methylpenta-1,3-dien-3-yl)-1-oxo-2,3-dihydro-1*H*-indene-2-carboxylate  
CCDC 1479692

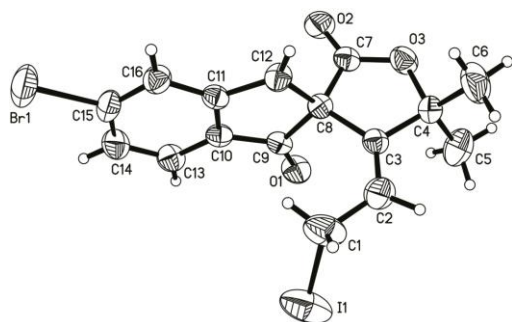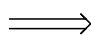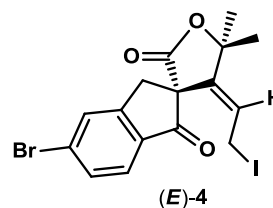

(*R,E*)-5-bromo-4-(2-iodoethylidene)-5,5-dimethyl-4,5-dihydro-2*H*-spiro[furan-3,2'-indene]-1',2(3'*H*)-dione  
CCDC 1480048

The supplementary crystallographic data can be obtained free of charge from the Cambridge Crystallographic Data Center via [www.ccdc.cam.ac.uk/data\\_request/cif](http://www.ccdc.cam.ac.uk/data_request/cif).

## VII. Proposed stereochemical model

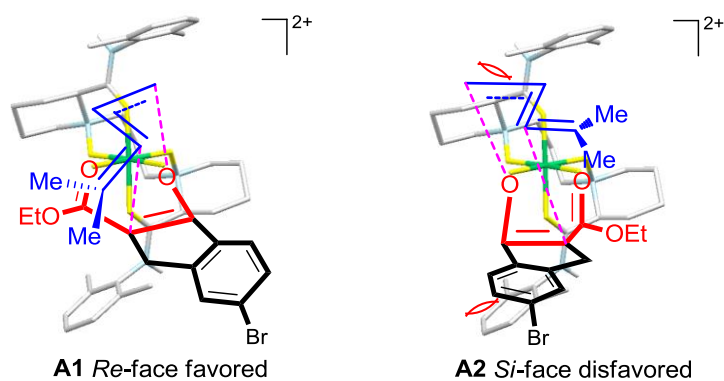

Based on the X-ray crystal structure of the *N,N'*-dioxide/ metal complexes,<sup>18</sup> the absolute configuration of the product **2g**, and our previous reports,<sup>7</sup> a possible stereochemical model was proposed. The *1H*-indone-derived allenyl vinyl ether **1g** could be activated through coordination to the nickel atom in a bidentate fashion, which might result in two possible chairlike transition states. We postulate two adverse factors lead to the intermediate **A2** disfavored: the steric hindrance between the *1H*-indone backbone and the downward amide group of the ligand; the possible repulsive interaction of allenyl unit with the upward amide group ligand. Therefore, the allenyl would preferentially approach the enolate ether from the *Re* face to afford exclusive (*R*)-product (model **A1**).

### VIII. Spectral data of typical substrate

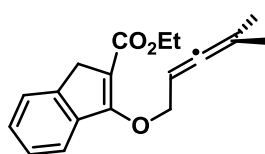

**1a**, colorless oil.  $^1\text{H}$  NMR (400 MHz,  $\text{CDCl}_3$ )  $\delta$  = 7.59 (dd,  $J=6.0, 2.3$ , 1H), 7.37 (ddt,  $J=12.1, 9.5, 4.3$ , 3H), 5.23 (qt,  $J=5.8, 2.8$ , 1H), 5.00 (d,  $J=6.7, 2\text{H}$ ), 4.27 (q,  $J=7.1$ , 2H), 3.66 (s, 2H), 1.61 (d,  $J=2.8$ , 6H), 1.35 (t,  $J=7.1$ , 3H).  $^{13}\text{C}$  NMR (100 MHz,  $\text{CDCl}_3$ )  $\delta$  = 203.26, 164.64, 163.83, 141.97, 140.59, 128.30, 126.56, 124.08, 121.03, 110.84, 96.95, 86.05, 72.33, 59.94, 36.38, 20.23, 14.46.

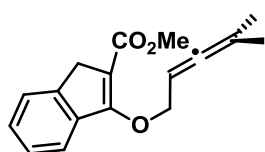

**1b**, colorless oil.  $^1\text{H}$  NMR (400 MHz,  $\text{CDCl}_3$ )  $\delta$  = 7.55 – 7.48 (m, 1H), 7.37 – 7.32 (m, 1H), 7.31 – 7.24 (m, 2H), 5.22 – 5.09 (m, 1H), 4.94 (d,  $J=6.7, 2\text{H}$ ), 3.73 (s, 3H), 3.58 (s, 2H), 1.53 (d,  $J=2.8, 6\text{H}$ ).  $^{13}\text{C}$  NMR (100 MHz,  $\text{CDCl}_3$ )  $\delta$  = 203.26, 165.01, 164.10, 141.98, 140.46, 128.40, 126.60, 124.12, 121.11, 110.20, 97.01, 86.02, 72.35, 51.27, 36.34, 20.23.

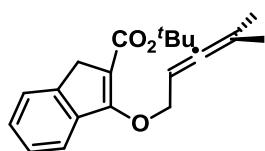

**1c**, colorless oil.  $^1\text{H}$  NMR (400 MHz,  $\text{CDCl}_3$ )  $\delta$  = 7.52 – 7.47 (m, 1H), 7.33 (dd,  $J=5.0, 3.0$ , 1H), 7.29 – 7.20 (m, 2H), 5.20 – 5.10 (m, 1H), 4.86 (d,  $J=6.8, 2\text{H}$ ), 3.53 (s, 2H), 1.53 (d,  $J=2.8, 6\text{H}$ ), 1.49 (s, 9H).  $^{13}\text{C}$  NMR (100 MHz,  $\text{CDCl}_3$ )  $\delta$  = 203.35, 164.20, 162.87, 141.85, 140.76, 128.00, 126.48, 124.03, 120.90, 113.61, 96.85, 86.08, 80.03, 72.13, 36.56, 28.42, 20.26.

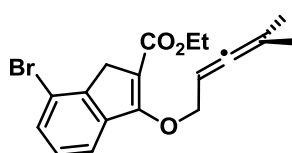

**1d**, colorless oil.  $^1\text{H}$  NMR (400 MHz,  $\text{CDCl}_3$ )  $\delta$  = 7.48 – 7.40 (m, 2H), 7.19 – 7.13 (m, 1H), 5.16 – 5.10 (m, 1H), 4.93 (d,  $J=6.7, 2\text{H}$ ), 4.23 – 4.18 (m, 2H), 3.53 (d,  $J=3.3, 2\text{H}$ ), 1.53 (d,  $J=2.8, 6\text{H}$ ), 1.29 (t,  $J=7.1, 3\text{H}$ ).  $^{13}\text{C}$  NMR (100 MHz,  $\text{CDCl}_3$ )  $\delta$  = 203.35, 164.24, 162.84, 142.24, 141.75, 131.29, 128.51, 120.09, 119.04, 111.33, 97.08, 85.84, 72.49, 60.17, 37.69, 20.24, 14.46.

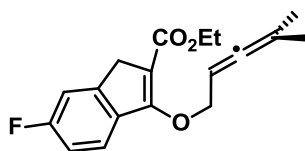

**1e**, yellow oil.  $^1\text{H}$  NMR (400 MHz,  $\text{CDCl}_3$ )  $\delta$  = 7.45 (dd,  $J=8.4, 5.1$ , 1H), 7.04 (dd,  $J=8.5, 2.0$ , 1H), 6.96 (td,  $J=9.2, 2.3$ , 1H), 5.20 – 5.05 (m, 1H), 4.93 (d,  $J=6.7, 2\text{H}$ ), 4.22 – 4.15 (m, 2H), 3.56 (s, 2H), 1.53 (d,  $J=2.8, 6\text{H}$ ), 1.27 (t,  $J=7.1, 3\text{H}$ ).  $^{13}\text{C}$  NMR (100 MHz,  $\text{CDCl}_3$ )  $\delta$  = 203.27, 163.62 (d,  $J=246$ ), 164.31, 163.07, 144.08 (d,  $J=10$ ), 136.62 (d,  $J=2$ ), 122.24 (d,  $J=9$ ), 114.08 (d,  $J=24$ ), 111.50 (d,  $J=24$ ), 110.15 (d,  $J=3$ ), 97.04, 85.93, 72.40, 59.98, 36.32 (d,  $J=2$ ), 20.22, 14.44.



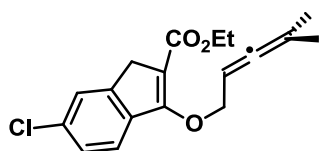

**1f**, yellow oil.  $^1\text{H}$  NMR (400 MHz,  $\text{CDCl}_3$ )  $\delta$  = 7.43 (d,  $J=8.1$ , 1H), 7.32 (d,  $J=1.2$ , 1H), 7.24 (dd,  $J=8.2$ , 1.8, 1H), 5.18 – 5.08 (m, 1H), 4.92 (d,  $J=6.7$ , 2H), 4.19 (q,  $J=7.1$ , 2H), 3.57 (s, 2H), 1.54 (d,  $J=2.8$ , 6H), 1.28 (t,  $J=7.1$ , 3H).  $^{13}\text{C}$  NMR (100 MHz,  $\text{CDCl}_3$ )  $\delta$  = 203.31, 164.34, 162.87, 143.35, 139.18, 134.52, 127.07, 124.44, 121.97, 110.77, 97.09, 85.87, 72.42, 60.09, 36.21, 20.23, 14.44.

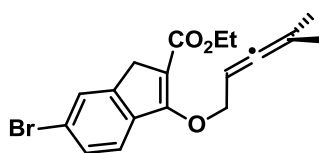

**1g**, light red solid.  $^1\text{H}$  NMR (400 MHz,  $\text{CDCl}_3$ )  $\delta$  = 7.48 (d,  $J=0.8$ , 1H), 7.39 (dt,  $J=14.0$ , 4.8, 2H), 5.17 – 5.07 (m, 1H), 4.92 (d,  $J=6.7$ , 2H), 4.19 (dt,  $J=7.1$ , 5.8, 2H), 3.55 (s, 2H), 1.53 (d,  $J=2.8$ , 6H), 1.28 (t,  $J=7.1$ , 3H).  $^{13}\text{C}$  NMR (100 MHz,  $\text{CDCl}_3$ )  $\delta$  = 203.32, 164.31, 162.90, 143.62, 139.63, 129.89, 127.35, 122.77, 122.28, 110.74, 97.09, 85.86, 72.43, 60.11, 36.22, 20.24, 14.44.

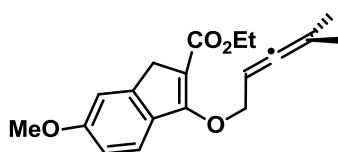

**1h**, light yellow oil.  $^1\text{H}$  NMR (400 MHz,  $\text{CDCl}_3$ )  $\delta$  = 7.42 (d,  $J=8.4$ , 1H), 6.90 (d,  $J=1.8$ , 1H), 6.82 (dd,  $J=8.4$ , 2.2, 1H), 5.15 (td,  $J=6.5$ , 3.3, 1H), 4.92 (d,  $J=6.7$ , 2H), 4.18 (q,  $J=7.1$ , 2H), 3.78 (s, 3H), 3.55 (s, 2H), 1.55 (d,  $J=2.8$ , 6H), 1.27 (s, 3H).  $^{13}\text{C}$  NMR (100 MHz,  $\text{CDCl}_3$ )  $\delta$  = 203.22, 164.59, 164.17, 160.75, 144.27, 133.40, 121.99, 113.13, 109.55, 108.79, 96.92, 86.09, 72.31, 59.76, 55.54, 36.21, 20.26, 14.50.

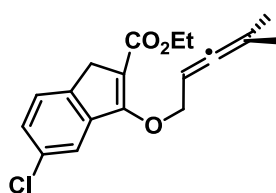

**1i**, white solid.  $^1\text{H}$  NMR (400 MHz,  $\text{CDCl}_3$ )  $\delta$  = 7.52 – 7.45 (m, 1H), 7.25 (d,  $J=1.6$ , 2H), 5.21 – 5.06 (m, 1H), 4.91 (d,  $J=6.6$ , 2H), 4.20 (q,  $J=7.1$ , 2H), 3.56 (s, 2H), 1.54 (t,  $J=2.8$ , 6H), 1.28 (t,  $J=7.1$ , 3H).  $^{13}\text{C}$  NMR (100 MHz,  $\text{CDCl}_3$ )  $\delta$  = 203.27, 164.31, 162.47, 142.38, 139.93, 132.77, 128.31, 125.12, 121.13, 112.11, 97.23, 85.89, 72.40, 60.14, 36.06, 20.23, 14.43.

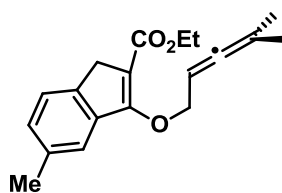

**1j**, colorless oil.  $^1\text{H}$  NMR (400 MHz,  $\text{CDCl}_3$ )  $\delta$  = 7.32 (d,  $J=0.6$ , 1H), 7.22 (d,  $J=7.6$ , 1H), 7.09 (dd,  $J=7.6$ , 0.8, 1H), 5.16 (qt,  $J=5.7$ , 2.8, 1H), 4.91 (d,  $J=6.7$ , 2H), 4.18 (q,  $J=7.1$ , 2H), 3.53 (s, 2H), 2.33 (s, 3H), 1.55 (d,  $J=2.8$ , 6H), 1.27 (t,  $J=7.1$ , 3H).  $^{13}\text{C}$  NMR (100 MHz,  $\text{CDCl}_3$ )  $\delta$  = 203.25, 164.68, 163.93, 140.73, 139.16, 136.29, 129.37, 123.80,

121.39, 111.04, 96.92, 86.12, 72.31, 59.90, 35.97, 21.46, 20.26, 14.47.

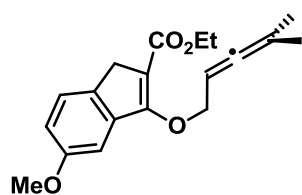

**1k**, colorless oil.  $^1\text{H}$  NMR (400 MHz,  $\text{CDCl}_3$ )  $\delta$  = 7.22 (d,  $J$ =8.2, 1H), 7.01 (dd,  $J$ =8.5, 2.4, 1H), 6.86 (dd,  $J$ =8.2, 2.5, 1H), 5.16 (pd,  $J$ =5.7, 2.8, 1H), 4.93 (d,  $J$ =6.7, 2H), 4.18 (dt,  $J$ =7.1, 6.1, 2H), 3.77 (s, 3H), 3.51 (s, 2H), 1.54 (d,  $J$ =2.8, 6H), 1.27 (t,  $J$ =7.1, 3H).  $^{13}\text{C}$  NMR (100 MHz,  $\text{CDCl}_3$ )  $\delta$  = 203.28, 164.57, 163.57, 159.02, 141.90, 134.16,

124.71, 115.78, 111.83, 104.97, 96.96, 86.03, 72.33, 59.94, 55.57, 35.68, 20.26, 14.45.

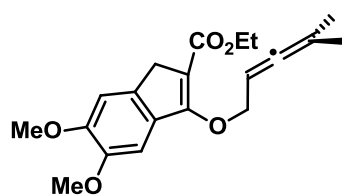

**1l**, white solid.  $^1\text{H}$  NMR (400 MHz,  $\text{CDCl}_3$ )  $\delta$  = 7.00 (s, 1H), 6.88 (s, 1H), 5.16 (qt,  $J$ =5.7, 2.8, 1H), 4.95 (d,  $J$ =6.7, 2H), 4.18 (q,  $J$ =7.1, 2H), 3.86 (d,  $J$ =3.4, 6H), 3.52 (s, 2H), 1.55 (d,  $J$ =2.8, 6H), 1.27 (t,  $J$ =7.1, 3H).  $^{13}\text{C}$  NMR (100 MHz,  $\text{CDCl}_3$ )  $\delta$  = 203.22, 164.44, 164.16, 150.49, 148.67, 135.34, 133.07, 108.91, 107.10,

103.33, 96.92, 86.09, 72.34, 59.74, 56.14, 36.20, 20.27, 14.49.

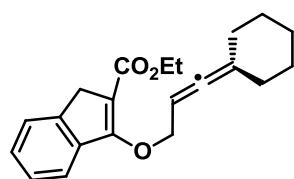

**1m**, light yellow oil.  $^1\text{H}$  NMR (400 MHz,  $\text{CDCl}_3$ )  $\delta$  = 7.55 – 7.50 (m, 1H), 7.36 – 7.33 (m, 1H), 7.27 (tt,  $J$ =7.2, 5.8, 2H), 5.22 – 5.10 (m, 1H), 4.94 (d,  $J$ =6.8, 2H), 4.20 (q,  $J$ =7.1, 2H), 3.58 (s, 2H), 2.00 – 1.90 (m, 4H), 1.48 – 1.35 (m, 6H), 1.28 (t,  $J$ =7.1, 3H).  $^{13}\text{C}$  NMR (100 MHz,  $\text{CDCl}_3$ )  $\delta$  = 200.14, 164.65, 163.79, 141.98, 140.59, 128.30, 126.56, 124.09, 121.09, 110.83,

103.94, 85.81, 72.63, 59.94, 36.37, 31.11, 27.13, 25.97, 14.49.

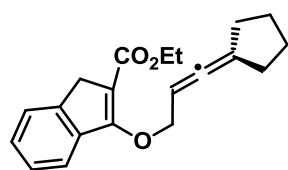

**1n**, light yellow oil.  $^1\text{H}$  NMR (400 MHz,  $\text{CDCl}_3$ )  $\delta$  = 7.60 (d,  $J$ =6.4, 1H), 7.41 (d,  $J$ =6.8, 1H), 7.33 (d,  $J$ =5.7, 2H), 5.33 (s, 1H), 5.03 (d,  $J$ =6.6, 2H), 4.29 – 4.24 (m, 2H), 3.66 (s, 2H), 2.33 – 2.3 (m, 4H), 1.63 – 1.57 (m, 4H), 1.35 (t,  $J$ =7.1, 3H).  $^{13}\text{C}$  NMR (100 MHz,  $\text{CDCl}_3$ )  $\delta$  =

198.60, 164.64, 163.87, 141.96, 140.57, 128.30, 126.54, 124.07, 121.06, 110.62, 105.45, 88.48, 72.41, 59.93, 36.41, 31.14, 27.01, 14.47.

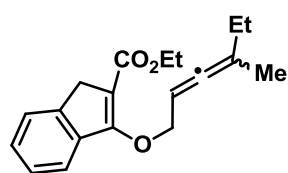

**1o**, light yellow oil.  $^1\text{H}$  NMR (400 MHz,  $\text{CDCl}_3$ )  $\delta$  = 7.47 (ddd,  $J$ =7.1, 4.0, 2.8, 1H), 7.29 (dd,  $J$ =5.7, 2.3, 1H), 7.24 – 7.18 (m, 2H), 5.24 (ddd,  $J$ =9.6, 6.2, 3.0, 1H), 4.96 – 4.87 (m, 2H), 4.15 (dt,  $J$ =7.1, 5.5, 2H), 3.53 (s, 2H), 1.76 (tt,  $J$ =7.3, 3.7, 2H), 1.51 (d,  $J$ =2.8, 3H), 1.24 (t,

$J=7.1$ , 3H), 0.81 (t,  $J=7.4$ , 3H).  $^{13}\text{C}$  NMR (100 MHz,  $\text{CDCl}_3$ )  $\delta$  = 202.48, 164.56, 163.94, 141.95, 140.59, 128.31, 126.54, 124.05, 120.99, 110.81, 103.12, 88.08, 72.55, 59.89, 36.38, 26.69, 18.72, 14.46, 12.01.

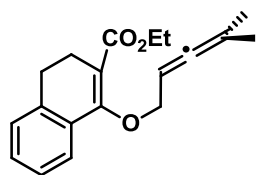

**1p**, light yellow oil.  $^1\text{H}$  NMR (400 MHz,  $\text{CDCl}_3$ )  $\delta$  = 7.64 – 7.57 (m, 1H), 7.26 – 7.20 (m, 2H), 7.17 – 7.12 (m, 1H), 5.28 (ddd,  $J=9.7$ , 6.8, 3.0, 1H), 4.41 (d,  $J=7.0$ , 2H), 4.27 (tt,  $J=7.1$ , 3.5, 2H), 2.77 (t,  $J=7.7$ , 2H), 2.66 – 2.60 (m, 2H), 1.66 (dd,  $J=2.8$ , 1.0, 6H), 1.35 (td,  $J=7.1$ , 1.1, 3H).  $^{13}\text{C}$  NMR (100 MHz,  $\text{CDCl}_3$ )  $\delta$  = 203.42, 167.22, 158.56, 138.93, 131.58, 129.40, 127.32, 126.47, 124.46, 114.93, 96.35, 85.99, 72.41, 60.29, 27.80, 24.23, 20.25, 14.35.

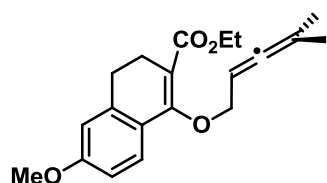

**1q**, light yellow oil.  $^1\text{H}$  NMR (400 MHz,  $\text{CDCl}_3$ )  $\delta$  = 7.46 (d,  $J=8.5$ , 1H), 6.68 (dd,  $J=8.6$ , 2.5, 1H), 6.62 (d,  $J=2.3$ , 1H), 5.32 – 5.07 (m, 1H), 4.32 (d,  $J=7.1$ , 2H), 4.18 (q,  $J=7.1$ , 2H), 3.73 (s, 3H), 2.69 – 2.64 (m, 2H), 2.56 – 2.51 (m, 2H), 1.58 (d,  $J=2.8$ , 6H), 1.27 (t,  $J=7.1$ , 3H).  $^{13}\text{C}$  NMR (100 MHz,  $\text{CDCl}_3$ )  $\delta$  = 203.37, 167.35, 160.67, 159.23, 141.25, 126.26, 124.44, 113.18, 112.29, 111.47, 96.35, 85.99, 72.48, 60.20, 55.27, 28.29, 24.18, 20.31, 14.38.

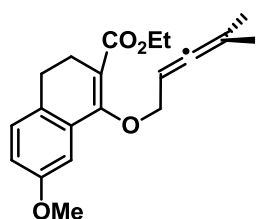

**1r**, light yellow oil.  $^1\text{H}$  NMR (400 MHz,  $\text{CDCl}_3$ )  $\delta$  = 7.18 (d,  $J=2.3$ , 1H), 7.07 (d,  $J=8.2$ , 1H), 6.81 (dd,  $J=8.2$ , 2.4, 1H), 5.28 (dd,  $J=6.1$ , 3.1, 1H), 4.41 (d,  $J=7.1$ , 2H), 4.28 (q,  $J=7.1$ , 2H), 3.80 (s, 3H), 2.75 – 2.67 (m, 2H), 2.65 – 2.55 (m, 2H), 1.66 (d,  $J=2.7$ , 6H), 1.36 (t,  $J=7.1$ , 3H).  $^{13}\text{C}$  NMR (100 MHz,  $\text{CDCl}_3$ )  $\delta$  = 203.43, 167.30, 158.46, 158.29, 132.63, 131.07, 128.13, 115.50, 114.95, 109.89, 96.43, 85.89, 72.50, 60.35, 55.34, 55.32, 26.88, 24.59, 20.26, 14.34.

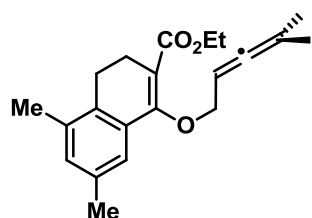

**1s**, light yellow oil.  $^1\text{H}$  NMR (400 MHz,  $\text{CDCl}_3$ )  $\delta$  = 7.23 (s, 1H), 6.91 (s, 1H), 5.31 – 5.10 (m, 1H), 4.29 (d,  $J=7.1$ , 2H), 4.20 (q,  $J=7.1$ , 2H), 2.63 – 2.58 (m, 2H), 2.55 – 2.49 (m, 2H), 2.24 (s, 3H), 2.19 (s, 3H), 1.61 (d,  $J=2.8$ , 6H), 1.29 (t,  $J=7.1$ , 3H).  $^{13}\text{C}$  NMR (100 MHz,  $\text{CDCl}_3$ )  $\delta$  = 203.38, 167.45, 158.94, 135.24, 134.76, 134.43, 132.30, 131.32, 122.98, 114.41, 96.34, 85.96, 72.31, 60.33, 23.90, 23.51, 21.21, 20.35, 19.34, 14.38.

## IX. Spectral data of rearrangement product

### (*R*)-ethyl 2-(4-methylpenta-1,3-dien-3-yl)-1-oxo-2,3-dihydro-1*H*-indene-2-carboxylate (**2a**).

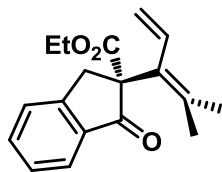

Reaction time: 48 h; Yield: 90%;  $[\alpha]_D^{15} = -9.9$  ( $c$  1.53,  $\text{CH}_2\text{Cl}_2$ , 99% ee); HPLC (Daicel chiralpak ID, *n*-hexane/*i*-PrOH 90/10, 1.0 mL/min,  $t_{R(\text{major})} = 8.00$  min,  $t_{R(\text{minor})} = 13.05$  min);  $^1\text{H}$  NMR (400 MHz,  $\text{CDCl}_3$ )  $\delta$  7.76 (d,  $J = 7.7$  Hz, 1H), 7.60 (t,  $J = 7.4$  Hz, 1H), 7.48 (d,  $J = 7.7$  Hz, 1H), 7.37 (t,  $J = 7.4$  Hz, 1H), 6.43 (dd,  $J = 17.8, 11.3$  Hz, 1H), 5.03 (dd,  $J = 11.3, 1.4$  Hz, 1H), 4.79 (dd,  $J = 17.8, 1.3$  Hz, 1H), 4.28 (d,  $J = 17.1$  Hz, 1H), 4.22 – 4.10 (m, 2H), 3.22 (d,  $J = 17.1$  Hz, 1H), 1.80 (s, 3H), 1.57 (s, 3H), 1.23 (t,  $J = 7.1$  Hz, 3H).  $^{13}\text{C}$  NMR (100 MHz,  $\text{CDCl}_3$ )  $\delta = 200.49, 170.27, 153.03, 136.67, 135.28, 135.01, 133.70, 131.92, 127.68, 126.14, 124.88, 116.00, 67.09, 62.18, 40.44, 23.10, 22.74, 13.98$ . ESI-HRMS calcd for  $[\text{C}_{18}\text{H}_{20}\text{O}_3 + \text{Na}^+]$ : 307.1310, found 307.1314.

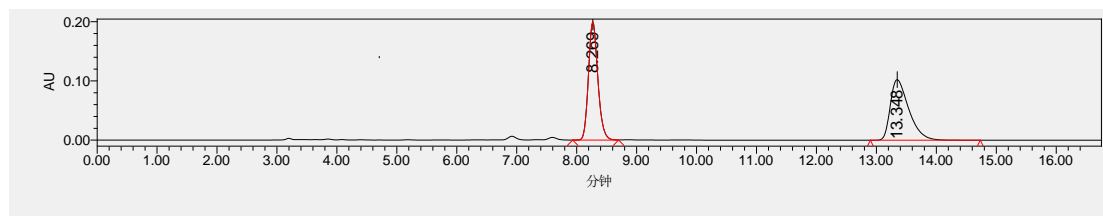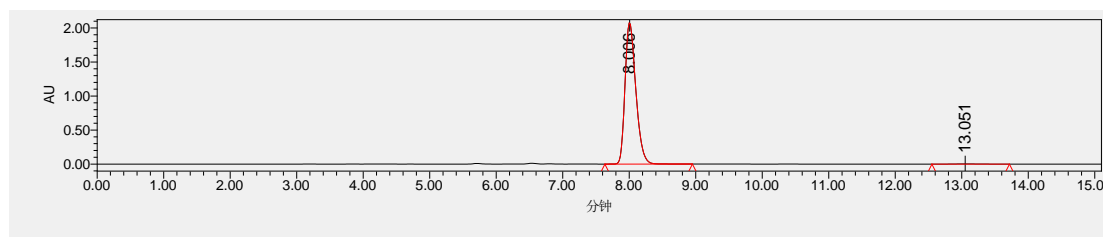

|   | Retention Time | Area    | % Area |   | Retention Time | Area     | % Area |
|---|----------------|---------|--------|---|----------------|----------|--------|
| 1 | 8.269          | 2174107 | 49.88  | 1 | 8.006          | 23347533 | 99.75  |
| 2 | 13.348         | 2184193 | 50.12  | 2 | 13.051         | 57868    | 0.25   |

### (*R*)-methyl 2-(4-methylpenta-1,3-dien-3-yl)-1-oxo-2,3-dihydro-1*H*-indene-2-carboxylate (**2b**).

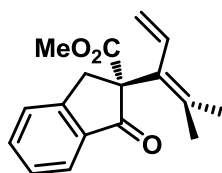

Reaction time: 34 h; Yield: 85%;  $[\alpha]_D^{25} = -382.8$  ( $c$  0.46,  $\text{CH}_2\text{Cl}_2$ , 99% ee); HPLC (Daicel chiralpak IE, *n*-hexane/*i*-PrOH 95/5, 1.0 mL/min,  $t_{R(\text{major})} = 16.55$  min,  $t_{R(\text{minor})} = 17.97$  min);  $^1\text{H}$  NMR (400 MHz,  $\text{CDCl}_3$ )  $\delta = 7.71$  (t,  $J = 10.8$ , 1H), 7.54 (t,  $J = 7.4$ , 1H), 7.41 (d,  $J = 7.7$ , 1H), 7.31 (t,  $J = 7.5$ , 1H), 6.36 (dd,  $J = 17.8, 11.3$ , 1H), 4.96 (dd,  $J = 11.3, 1.2$ , 1H), 4.71 (dd,  $J = 17.8, 1.1$ , 1H), 4.22 (d,  $J = 17.1$ , 1H), 3.63 (s, 3H), 3.14 (d,  $J = 17.1$ , 1H), 1.74 (s, 3H), 1.49 (s, 3H).  $^{13}\text{C}$  NMR (100 MHz,  $\text{CDCl}_3$ )  $\delta = 200.49, 170.92, 153.07, 136.56, 135.41, 134.92, 134.02, 131.78, 127.76, 126.19, 125.01, 115.94,$

67.06, 53.30, 40.32, 23.02, 22.78. ESI-HRMS calcd for  $[C_{17}H_{18}O_3+Na^+]$ : 293.1154, found 293.1150.

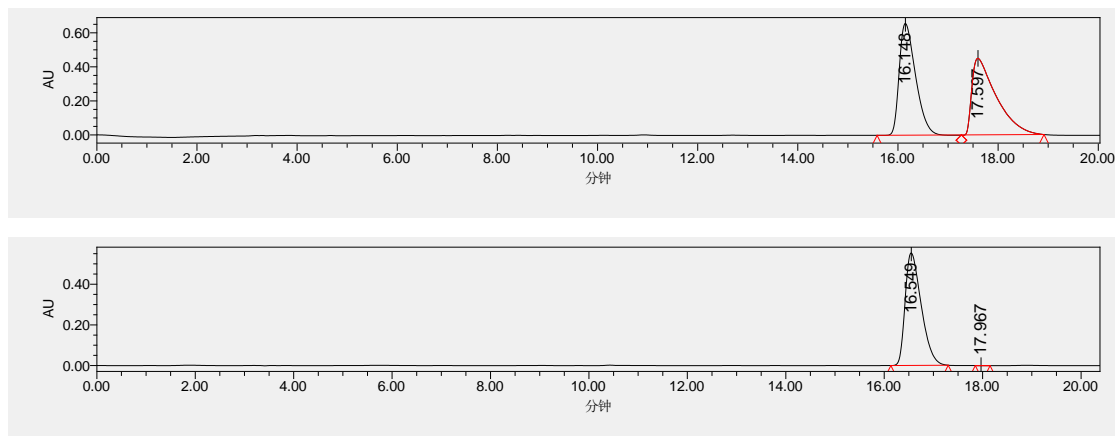

|   | Retention Time | Area     | % Area |   | Retention Time | Area     | % Area |
|---|----------------|----------|--------|---|----------------|----------|--------|
| 1 | 16.148         | 14903821 | 49.57  | 1 | 16.549         | 12558767 | 100.00 |
| 2 | 17.597         | 15160423 | 50.43  | 2 | 17.967         | 42       | 0.00   |

**(R)-tert-butyl 2-(4-methylpenta-1,3-dien-3-yl)-1-oxo-2,3-dihydro-1H-indene-2-carboxylate (2c).**

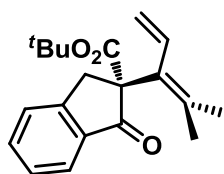

Reaction time: 48 h; Yield: 90%;  $[\alpha]_D^{25} = -253.1$  (*c* 0.57,  $CH_2Cl_2$ , 99% ee); HPLC (Daicel chiralpak ID, *n*-hexane/*i*-PrOH 99/1, 1.0 mL/min,  $t_{R(\text{major})} = 9.75$  min,  $t_{R(\text{minor})} = 10.87$  min);  $^1H$  NMR (400 MHz,  $CDCl_3$ )  $\delta = 7.75$  (d,  $J=7.7$ , 1H), 7.62 – 7.55 (m, 1H), 7.45 (d,  $J=7.7$ , 1H), 7.36 (t,  $J=7.4$ , 1H), 6.36 (dd,  $J=17.8$ , 11.2, 1H), 5.04 (dd,  $J=11.2$ , 1.7, 1H), 4.77 (dd,  $J=17.8$ , 1.6, 1H), 4.16 (d,  $J=17.1$ , 1H), 3.21 (d,  $J=17.1$ , 1H), 1.79 (s, 3H), 1.61 (s, 3H), 1.39 (s, 9H).  $^{13}C$  NMR (100 MHz,  $CDCl_3$ )  $\delta = 200.96$ , 169.21, 153.03, 136.88, 135.32, 135.03, 133.03, 132.44, 127.54, 126.03, 124.73, 116.36, 81.99, 67.68, 40.73, 27.68, 23.16, 22.71. ESI-HRMS calcd for  $[C_{20}H_{24}O_3+Na^+]$ : 335.1623, found 335.1619.

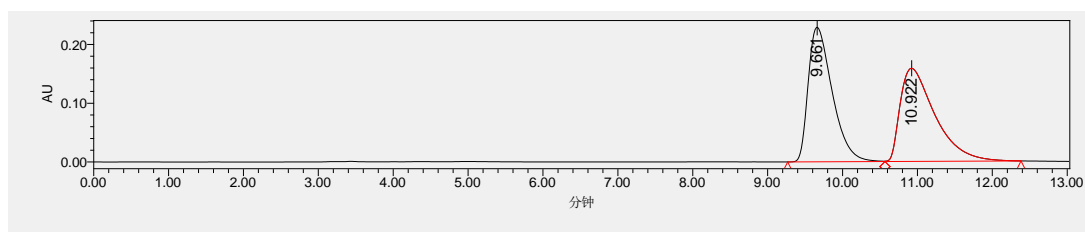

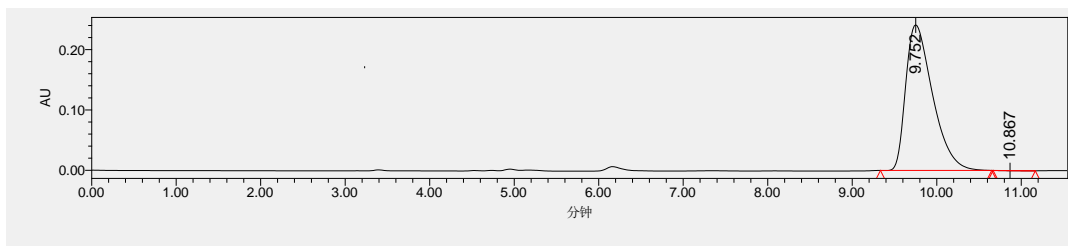

|   | Retention Time | Area    | % Area |   | Retention Time | Area    | % Area |
|---|----------------|---------|--------|---|----------------|---------|--------|
| 1 | 9.661          | 5095969 | 49.97  | 1 | 9.752          | 5321073 | 99.92  |
| 2 | 10.922         | 5102855 | 50.03  | 2 | 10.867         | 4067    | 0.08   |

**(R)-ethyl 4-bromo-2-(4-methylpenta-1,3-dien-3-yl)-1-oxo-2,3-dihydro-1H-indene-2-carboxylate (2d).**

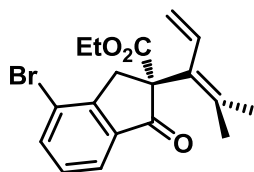

Reaction time: 48 h; Yield: 84%;  $[\alpha]_D^{25} = -266.0$  ( $c$  0.60,  $\text{CH}_2\text{Cl}_2$ , 99% ee); HPLC (Daicel chiralpak ID,  $n$ -hexane/ $i$ -PrOH 95/5, 1.0 mL/min,  $t_{R(\text{major})} = 7.62$  min,  $t_{R(\text{minor})} = 8.79$  min);  $^1\text{H}$  NMR (400 MHz,  $\text{CDCl}_3$ )  $\delta = 7.71$  (d,  $J=7.7$ , 1H), 7.64 (d,  $J=7.6$ , 1H), 7.24 – 7.19 (m, 1H), 6.33 (dd,  $J=17.7$ , 11.3, 1H), 5.05 – 4.93 (m, 1H), 4.72 (d,  $J=17.8$ , 1H), 4.21 – 4.03 (m, 3H), 3.05 (d,  $J=17.6$ , 1H), 1.74 (s, 3H), 1.50 (s, 3H), 1.17 (t,  $J=7.1$ , 3H).  $^{13}\text{C}$  NMR (100 MHz,  $\text{CDCl}_3$ )  $\delta = 199.93$ , 169.85, 152.66, 138.08, 136.94, 136.42, 134.19, 131.56, 129.50, 123.74, 121.65, 116.42, 67.13, 62.46, 41.41, 23.20, 22.77, 13.99. ESI-HRMS calcd for  $[\text{C}_{18}\text{H}_{19}^{79}\text{BrO}_3+\text{Na}^+]$ : 385.0415, found 385.0415;  $[\text{C}_{18}\text{H}_{19}^{81}\text{BrO}_3+\text{Na}^+]$ : 387.0355, found 387.0399.

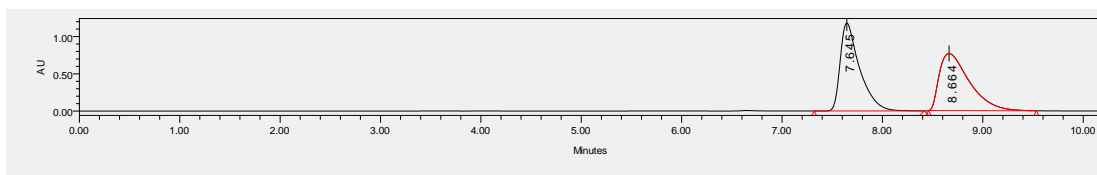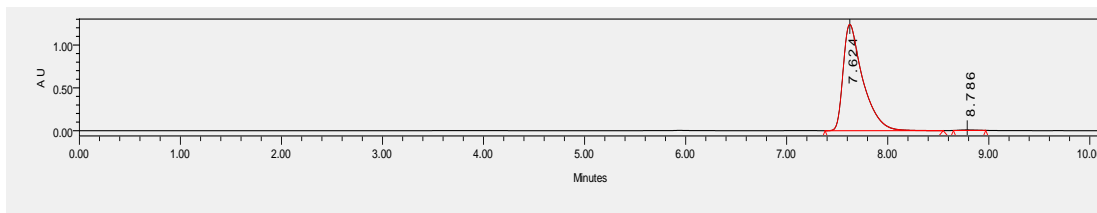

|   | Retention Time | Area     | % Area |   | Retention Time | Area     | % Area |
|---|----------------|----------|--------|---|----------------|----------|--------|
| 1 | 7.645          | 15846082 | 49.86  | 1 | 7.624          | 16698612 | 99.62  |
| 2 | 8.664          | 15932530 | 50.14  | 2 | 8.786          | 63058    | 0.38   |

**(R)-ethyl 5-fluoro-2-(4-methylpenta-1,3-dien-3-yl)-1-oxo-2,3-dihydro-1H-indene-2-**

**carboxylate (2e).**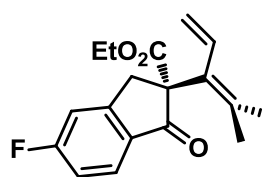

Reaction time: 36 h; Yield: 83%;  $[\alpha]_D^{25} = -333.6$  (*c* 0.50, CH<sub>2</sub>Cl<sub>2</sub>, 99% ee); HPLC (Daicel chiralpak IE, *n*-hexane/*i*-PrOH 95/5, 1.0 mL/min,  $t_{R(\text{major})} = 10.36$  min,  $t_{R(\text{minor})} = 9.88$  min); <sup>1</sup>H NMR (400 MHz, CDCl<sub>3</sub>)  $\delta = 7.77$  (dd, *J*=8.4, 5.3, 1H), 7.14 (d, *J*=8.3, 1H), 7.11 – 7.02 (m, 1H), 6.43 (dd, *J*=17.8, 11.3, 1H), 5.04 (d, *J*=11.3, 1H), 4.78 (d, *J*=17.8, 1H), 4.26 (d, *J*=17.3, 1H), 4.21 – 4.10 (m, 2H), 3.19 (d, *J*=17.3, 1H), 1.80 (s, 3H), 1.56 (s, 3H), 1.24 (t, *J*=7.1, 3H). <sup>13</sup>C NMR (100 MHz, CDCl<sub>3</sub>)  $\delta = 198.66, 170.13, 167.43$  (d, *J*=256), 156.00 (d, *J*=10), 136.58, 133.99, 131.68, 131.37 (d, *J*=2), 127.30 (d, *J*=11), 116.12 (d, *J*=24), 116.11, 112.87 (d, *J*=22), 67.40, 62.38, 40.23, 23.08, 22.76, 13.99. ESI-HRMS calcd for [C<sub>18</sub>H<sub>19</sub>FO<sub>3</sub>+Na<sup>+</sup>]: 325.1216, found 325.1214.

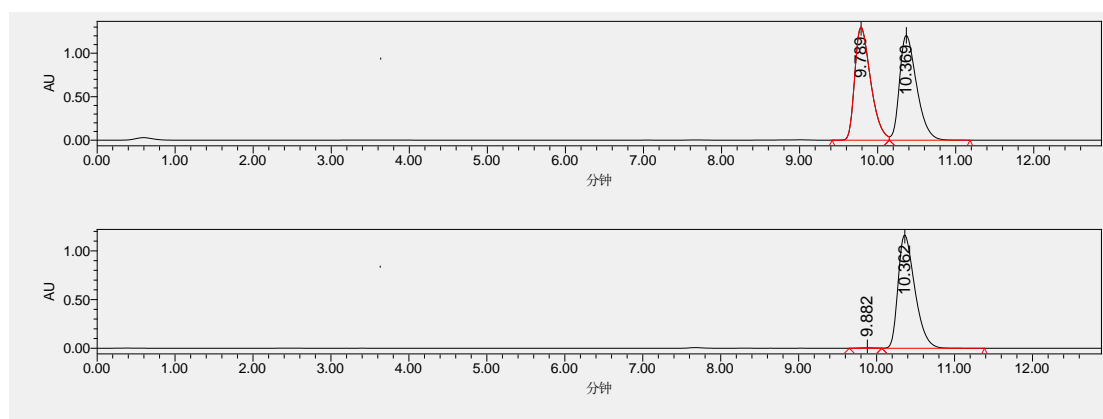

|   | Retention Time | Area     | % Area |   | Retention Time | Area     | % Area |
|---|----------------|----------|--------|---|----------------|----------|--------|
| 1 | 9.789          | 18336749 | 50.02  | 1 | 9.882          | 63313    | 0.36   |
| 2 | 10.369         | 18323519 | 49.98  | 2 | 10.362         | 17443364 | 99.64  |

**(R)-ethyl 5-chloro-2-(4-methylpenta-1,3-dien-3-yl)-1-oxo-2,3-dihydro-1H-indene-2-carboxylate (2f).**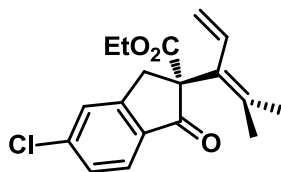

Reaction time: 120 h; Yield: 74%;  $[\alpha]_D^{17} = -328.6$  (*c* 0.47, CH<sub>2</sub>Cl<sub>2</sub>, 99% ee); HPLC (Daicel chiralpak IE, *n*-hexane/*i*-PrOH 95/5, 1.0 mL/min,  $t_{R(\text{major})} = 10.92$  min,  $t_{R(\text{minor})} = 10.18$  min); <sup>1</sup>H NMR (400 MHz, CDCl<sub>3</sub>)  $\delta = 7.62$  (d, *J*=8.2, 1H), 7.40 (d, *J*=0.9, 1H), 7.33 – 7.24 (m, 1H), 6.35 (dd, *J*=17.8, 11.3, 1H), 4.96 (dd, *J*=11.3, 1.5, 1H), 4.70 (dd, *J*=17.8, 1.4, 1H), 4.18 (d, *J*=17.3, 1H), 4.14 – 4.04 (m, 2H), 3.10 (d, *J*=17.3, 1H), 1.72 (s, 3H), 1.48 (d, *J*=0.9, 3H), 1.16 (t, *J*=7.1, 3H). <sup>13</sup>C NMR (100 MHz, CDCl<sub>3</sub>)  $\delta = 199.11, 169.98, 154.46, 141.90, 136.53, 134.07, 133.44, 131.56, 128.58, 126.40, 126.03, 116.15, 67.30, 62.42, 40.05, 23.15, 22.74, 13.99$ . ESI-HRMS calcd for [C<sub>18</sub>H<sub>19</sub><sup>35</sup>ClO<sub>3</sub>+Na<sup>+</sup>]: 341.0920, found 341.0917; [C<sub>18</sub>H<sub>19</sub><sup>37</sup>ClO<sub>3</sub>+Na<sup>+</sup>]: 343.0891, found 343.0862.

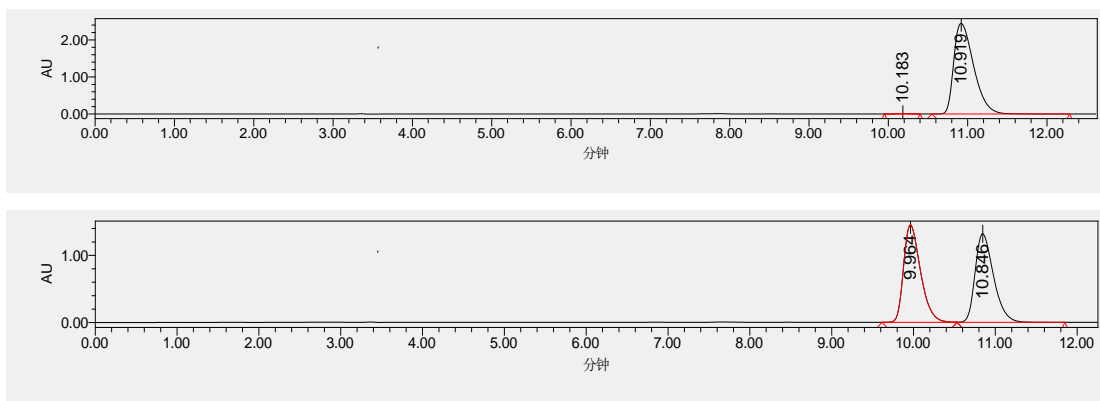

|   | Retention Time | Area     | % Area |   | Retention Time | Area     | % Area |
|---|----------------|----------|--------|---|----------------|----------|--------|
| 1 | 9.964          | 20874454 | 50.35  | 1 | 10.183         | 113458   | 0.27   |
| 2 | 10.846         | 20584849 | 49.65  | 2 | 10.919         | 42547760 | 99.73  |

**(R)-ethyl 5-bromo-2-(4-methylpenta-1,3-dien-3-yl)-1-oxo-2,3-dihydro-1H-indene-2-carboxylate (2g).**

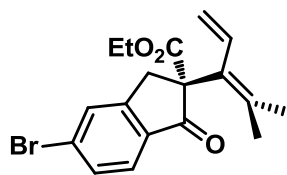

Reaction time: 53 h; Yield: 87%;  $[\alpha]_D^{25} = -286.5$  (*c* 0.51, CH<sub>2</sub>Cl<sub>2</sub>, 98% ee); HPLC (Daicel chiralpak IE, *n*-hexane/*i*-PrOH 90/10, 1.0 mL/min,  $t_{R(\text{major})} = 8.40$  min,  $t_{R(\text{minor})} = 7.73$  min); <sup>1</sup>H NMR (400 MHz, CDCl<sub>3</sub>)  $\delta = 7.66$  (s, 1H), 7.62 (d, *J*=8.2, 1H), 7.52 (d, *J*=8.2, 1H), 6.41 (dd, *J*=17.8, 11.3, 1H), 5.04 (dd, *J*=11.3, 1.3, 1H), 4.77 (dd, *J*=17.8, 1.1, 1H), 4.25 (d, *J*=17.3, 1H), 4.21 – 4.10 (m, 2H), 3.18 (d, *J*=17.3, 1H), 1.80 (s, 3H), 1.55 (s, 3H), 1.23 (t, *J*=7.1, 3H). <sup>13</sup>C NMR (100 MHz, CDCl<sub>3</sub>)  $\delta = 199.36, 169.94, 154.57, 136.53, 134.10, 133.85, 131.52, 131.43, 130.83, 129.49, 126.11, 116.19, 67.23, 62.44, 40.00, 23.16, 22.75, 13.99$ . ESI-HRMS calcd for [C<sub>18</sub>H<sub>19</sub><sup>79</sup>BrO<sub>3</sub>+Na<sup>+</sup>]: 385.0415, found 385.0417; [C<sub>18</sub>H<sub>19</sub><sup>81</sup>BrO<sub>3</sub>+Na<sup>+</sup>]: 387.0395, found 387.0400.

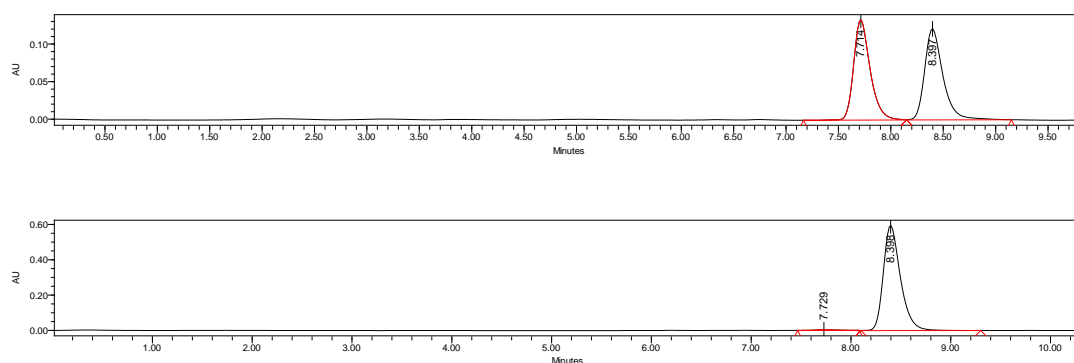



|   | Retention Time | Area    | % Area |   | Retention Time | Area    | % Area |
|---|----------------|---------|--------|---|----------------|---------|--------|
| 1 | 7.714          | 1464629 | 49.87  | 1 | 7.729          | 51630   | 0.72   |
| 2 | 8.397          | 1472532 | 50.13  | 2 | 8.398          | 7087878 | 99.28  |

**(R)-ethyl 5-methoxy-2-(4-methylpenta-1,3-dien-3-yl)-1-oxo-2,3-dihydro-1H-indene-2-carboxylate (2h).**

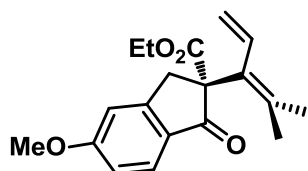

Reaction time: 48 h; Yield: 77%;  $[\alpha]_D^{17} = -359.7$  ( $c$  0.49,  $\text{CH}_2\text{Cl}_2$ , 99% ee); HPLC (Daicel chiralpak ID,  $n$ -hexane/ $i$ -PrOH 85/15, 1.0 mL/min,  $t_{R(\text{major})} = 13.21$  min,  $t_{R(\text{minor})} = 19.02$  min);  $^1\text{H}$  NMR (400 MHz,  $\text{CDCl}_3$ )  $\delta = 7.62$  (d,  $J=9.2$ , 1H), 6.90 – 6.76 (m, 2H), 6.39 (dd,  $J=17.8$ , 11.3, 1H), 4.95 (dd,  $J=11.3$ , 1.5, 1H), 4.72 (dd,  $J=17.9$ , 1.5, 1H), 4.15 (t,  $J=9.6$ , 1H), 4.13 – 3.97 (m, 2H), 3.82 (s, 3H), 3.06 (d,  $J=17.1$ , 1H), 1.73 (s, 3H), 1.50 (d,  $J=0.9$ , 3H), 1.16 (t,  $J=7.1$ , 3H).  $^{13}\text{C}$  NMR (100 MHz,  $\text{CDCl}_3$ )  $\delta = 198.57$ , 170.61, 165.77, 156.14, 136.81, 133.69, 132.02, 128.19, 126.70, 115.86, 115.69, 109.16, 67.37, 62.21, 55.71, 40.40, 23.04, 22.78, 14.03. ESI-HRMS calcd for  $[\text{C}_{19}\text{H}_{22}\text{O}_4 + \text{Na}^+]$ : 337.1416, found 337.1412.

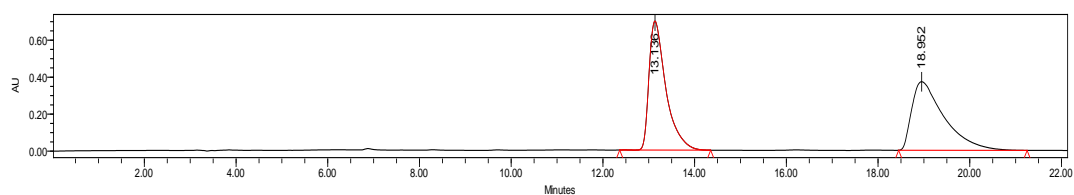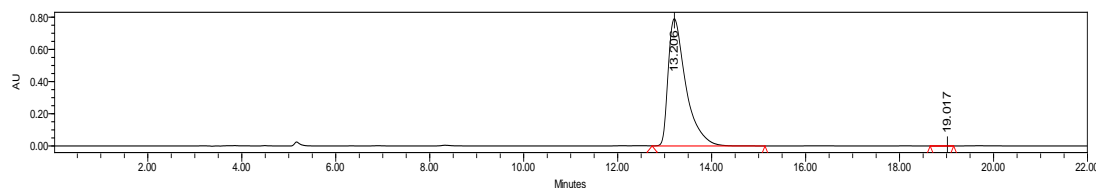

|   | Retention Time | Area     | % Area |   | Retention Time | Area     | % Area |
|---|----------------|----------|--------|---|----------------|----------|--------|
| 1 | 13.136         | 17812167 | 49.54  | 1 | 13.206         | 20636015 | 100.00 |
| 2 | 18.952         | 18140863 | 50.46  | 2 | 19.017         | 673      | 0.00   |

**(R)-ethyl 6-chloro-2-(4-methylpenta-1,3-dien-3-yl)-1-oxo-2,3-dihydro-1H-indene-2-carboxylate (2i).**

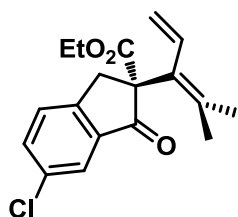

Reaction time: 30 h; Yield: 80%;  $[\alpha]_D^{17} = -331.1$  ( $c$  0.51,  $\text{CH}_2\text{Cl}_2$ , 99% ee); HPLC (Daicel chiralpak IE,  $n$ -hexane/ $i$ -PrOH 95/5, 1.0 mL/min,  $t_{R(\text{major})} = 10.99$  min,  $t_{R(\text{minor})} = 12.75$  min);  $^1\text{H}$  NMR (400 MHz,  $\text{CDCl}_3$ )  $\delta$

= 7.65 (d,  $J=1.9$ , 1H), 7.49 (dd,  $J=8.1$ , 2.0, 1H), 7.36 (d,  $J=8.2$ , 1H), 6.34 (dd,  $J=17.8$ , 11.3, 1H), 4.97 (dd,  $J=11.3$ , 1.4, 1H), 4.70 (dd,  $J=17.8$ , 1.4, 1H), 4.16 (d,  $J=17.2$ , 1H), 4.13 – 4.04 (m, 2H), 3.10 (d,  $J=17.2$ , 1H), 1.73 (s, 3H), 1.48 (d,  $J=0.9$ , 3H), 1.16 (t,  $J=7.1$ , 3H).  $^{13}\text{C}$  NMR (100 MHz,  $\text{CDCl}_3$ )  $\delta$  = 199.29, 169.92, 151.10, 136.52, 136.47, 135.31, 134.08, 134.07, 131.52, 127.41, 124.65, 116.18, 67.73, 62.43, 39.97, 23.21, 22.74, 13.99. ESI-HRMS calcd for  $[\text{C}_{18}\text{H}_{19}^{35}\text{ClO}_3+\text{Na}^+]$ : 341.0920, found 341.0915;  $[\text{C}_{18}\text{H}_{19}^{37}\text{ClO}_3+\text{Na}^+]$ : 343.0891, found 343.0857.

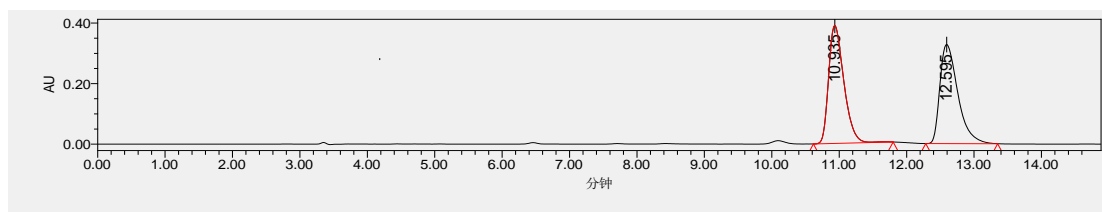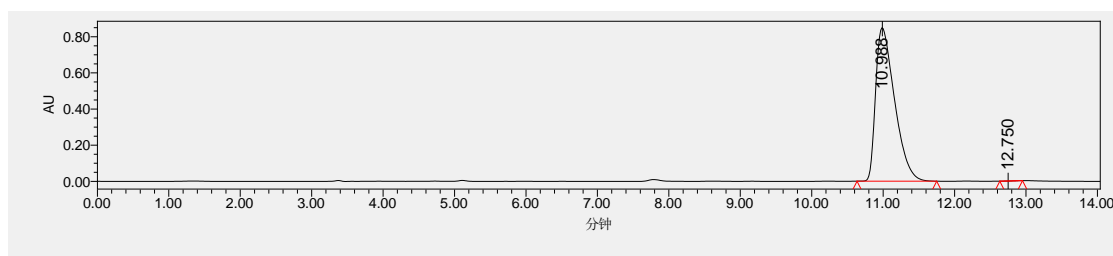

|   | Retention Time | Area    | % Area |   | Retention Time | Area     | % Area |
|---|----------------|---------|--------|---|----------------|----------|--------|
| 1 | 10.935         | 6093028 | 50.17  | 1 | 10.988         | 15612661 | 99.97  |
| 2 | 12.595         | 6052192 | 49.83  | 2 | 12.750         | 4308     | 0.03   |

**(R)-ethyl 6-methyl-2-(4-methylpenta-1,3-dien-3-yl)-1-oxo-2,3-dihydro-1H-indene-2-carboxylate (2j).**

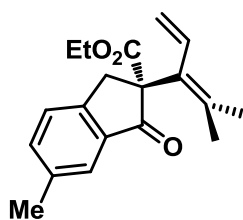

Reaction time: 24 h; Yield: 86%;  $[\alpha]_D^{25} = -281.4$  ( $c$  0.42,  $\text{CH}_2\text{Cl}_2$ , 99% ee); HPLC (Daicel chiralpak IE,  $n$ -hexane/ $i$ -PrOH 95/5, 1.0 mL/min,  $t_{\text{R}(\text{major})} = 7.37$  min,  $t_{\text{R}(\text{minor})} = 12.29$  min);  $^1\text{H}$  NMR (400 MHz,  $\text{CDCl}_3$ )  $\delta$  = 7.57 (s, 1H), 7.40 (dd,  $J=26.1$ , 7.7, 2H), 6.44 (dd,  $J=17.8$ , 11.3, 1H), 5.02 (dd,  $J=11.3$ , 1.2, 1H), 4.79 (dd,  $J=17.8$ , 1.1, 1H), 4.22 (d,  $J=16.9$ , 1H), 4.15 (qd,  $J=7.1$ , 1.6, 2H), 3.15 (d,  $J=16.9$ , 1H), 2.39 (s, 3H), 1.80 (s, 3H), 1.55 (s, 3H), 1.23 (t,  $J=7.1$ , 3H).  $^{13}\text{C}$  NMR (100 MHz,  $\text{CDCl}_3$ )  $\delta$  = 200.62, 170.37, 150.48, 137.67, 136.74, 136.60, 135.15, 133.69, 131.95, 125.82, 124.84, 115.80, 67.54, 62.20, 40.11, 23.17, 22.74, 21.06, 14.00. ESI-HRMS calcd for  $[\text{C}_{19}\text{H}_{22}\text{O}_3+\text{Na}^+]$ : 321.1467, found 321.1468.

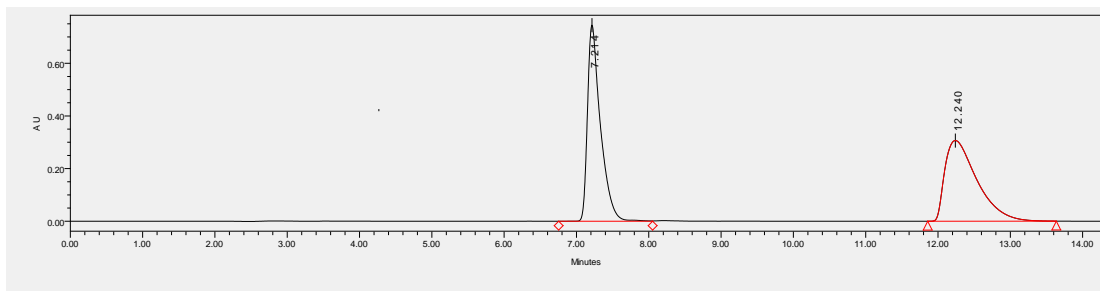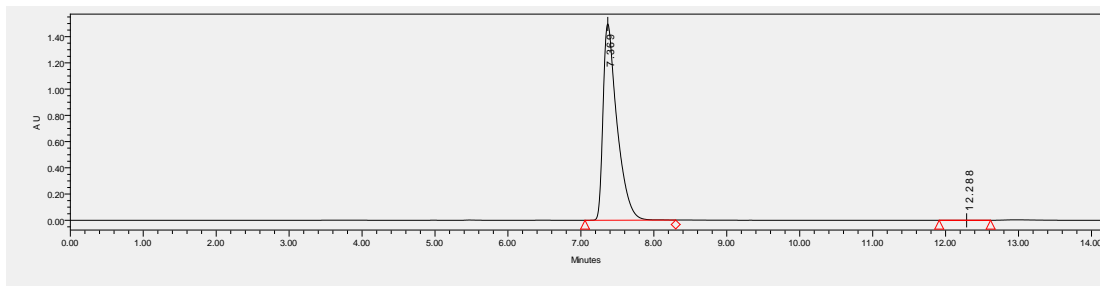

|   | Retention Time | Area    | % Area |
|---|----------------|---------|--------|
| 1 | 7.214          | 9288209 | 49.53  |
| 2 | 12.240         | 9466130 | 50.47  |

|   | Retention Time | Area     | % Area |
|---|----------------|----------|--------|
| 1 | 7.369          | 19870291 | 99.99  |
| 2 | 12.288         | 2122     | 0.01   |

**(R)-ethyl 6-methoxy-2-(4-methylpenta-1,3-dien-3-yl)-1-oxo-2,3-dihydro-1H-indene-2-carboxylate (2k).**

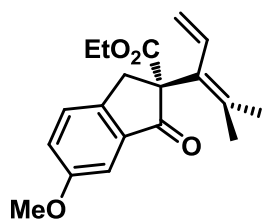

Reaction time: 30 h; Yield: 88%;  $[\alpha]_D^{17} = -332.5$  ( $c$  0.55,  $\text{CH}_2\text{Cl}_2$ , 99% ee); HPLC (Daicel chiralpak ID,  $n$ -hexane/ $i$ -PrOH 85/15, 1.0 mL/min,  $t_{\text{R(major)}} = 7.45$  min,  $t_{\text{R(minor)}} = 9.53$  min);  $^1\text{H}$  NMR (400 MHz,  $\text{CDCl}_3$ )  $\delta = 7.30$  (d,  $J=8.0$ , 1H), 7.19 – 7.08 (m, 2H), 6.38 (dd,  $J=17.8$ , 11.3, 1H), 4.96 (dd,  $J=11.3$ , 1.4, 1H), 4.72 (dd,  $J=17.9$ , 1.3, 1H), 4.15 – 4.03 (m, 3H), 3.75 (s, 3H), 3.05 (d,  $J=16.8$ , 1H), 1.73 (s, 3H), 1.52 – 1.45 (m, 3H), 1.16 (t,  $J=7.1$ , 3H).  $^{13}\text{C}$  NMR (100 MHz,  $\text{CDCl}_3$ )  $\delta = 200.56$ , 170.26, 159.61, 146.06, 136.69, 136.10, 133.79, 131.82, 126.88, 124.92, 115.79, 105.84, 68.02, 62.25, 55.59, 39.78, 23.18, 22.74, 14.02. ESI-HRMS calcd for  $[\text{C}_{19}\text{H}_{22}\text{O}_4 + \text{Na}^+]$ : 337.1416, found 337.1410.

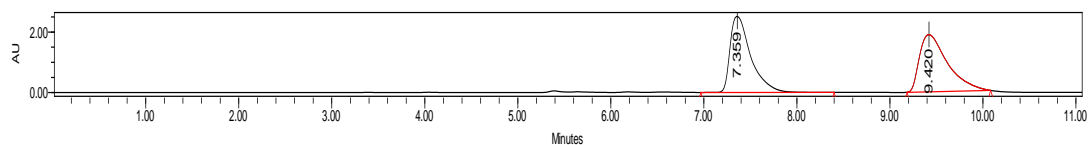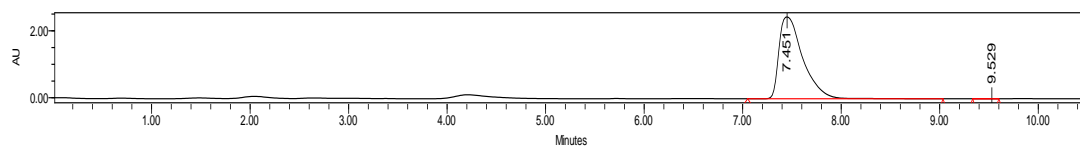

| Retention Time | Area | % Area |
|----------------|------|--------|
| 7.451          |      |        |
| 9.529          |      |        |

|   |       |          |       |
|---|-------|----------|-------|
| 1 | 7.359 | 38856068 | 49.49 |
| 2 | 9.420 | 39653823 | 50.51 |

|   | Retention Time | Area     | % Area |
|---|----------------|----------|--------|
| 1 | 7.451          | 40931137 | 100.00 |
| 2 | 9.529          | 1942     | 0.00   |

**(R)-ethyl 5,6-dimethoxy-2-(4-methylpenta-1,3-dien-3-yl)-1-oxo-2,3-dihydro-1H-indene-2-carboxylate (2l).**

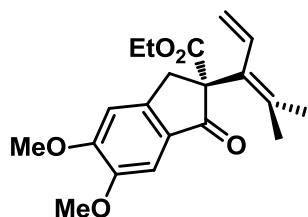

Reaction time: 24 h; Yield: 65%;  $[\alpha]_D^{30} = -370.7$  ( $c$  0.60,  $\text{CH}_2\text{Cl}_2$ , 99% ee); HPLC (Daicel chiralpak ID,  $n$ -hexane/ $i$ -PrOH 85/15, 1.0 mL/min,  $t_{R(\text{major})} = 14.36$  min,  $t_{R(\text{minor})} = 17.08$  min);  $^1\text{H}$  NMR (400 MHz,  $\text{CDCl}_3$ )  $\delta = 7.18$  (s, 1H), 6.90 (s, 1H), 6.47 (dd,  $J=17.8, 11.3$ , 1H), 5.03 (dd,  $J=11.3, 1.4$ , 1H), 4.80 (dd,  $J=17.9, 1.3$ , 1H), 4.22 – 4.12 (m, 3H), 3.98 (s, 3H), 3.90 (s, 3H), 3.10 (d,  $J=16.8$ , 1H), 1.81 (s, 3H), 1.57 (s, 3H), 1.24 (t,  $J=7.1$ , 4H).  $^{13}\text{C}$  NMR (100 MHz,  $\text{CDCl}_3$ )  $\delta = 199.04, 170.60, 155.98, 149.68, 148.66, 136.82, 133.70, 131.89, 127.63, 115.62, 106.99, 105.22, 67.52, 62.20, 56.28, 56.09, 40.14, 22.98, 22.77, 14.02$ . ESI-HRMS calcd for  $[\text{C}_{20}\text{H}_{24}\text{O}_5 + \text{Na}^+]$ : 367.1521, found 367.1522.

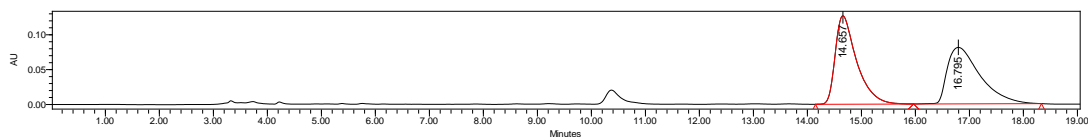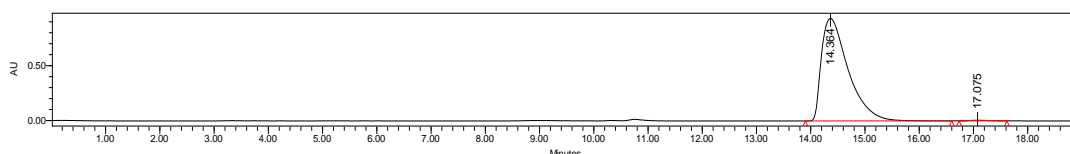

|   | Retention Time | Area    | % Area |
|---|----------------|---------|--------|
| 1 | 14.657         | 3485505 | 50.46  |
| 2 | 16.795         | 3422258 | 49.54  |

|   | Retention Time | Area     | % Area |
|---|----------------|----------|--------|
| 1 | 14.364         | 31940786 | 99.63  |
| 2 | 17.075         | 119727   | 0.37   |

**(R)-ethyl 2-(1-cyclohexylideneallyl)-1-oxo-2,3-dihydro-1H-indene-2-carboxylate (2m).**

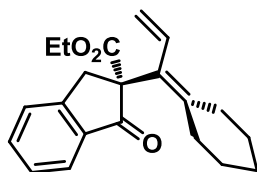

Reaction time: 48 h; Yield: 90%;  $[\alpha]_D^{17} = -287.3$  ( $c$  0.64,  $\text{CH}_2\text{Cl}_2$ , 99% ee); HPLC (Daicel chiralpak ID,  $n$ -hexane/ $i$ -PrOH 85/15, 1.0 mL/min,  $t_{R(\text{major})} = 6.58$  min,  $t_{R(\text{minor})} = 10.34$  min);  $^1\text{H}$  NMR (400 MHz,  $\text{CDCl}_3$ )  $\delta = 7.67$  (d,  $J=7.7$ , 1H), 7.53 (td,  $J=7.6, 1.1$ , 1H), 7.39 (d,  $J=7.7$ , 1H), 7.30 (dd,  $J=11.0, 3.9$ , 1H), 6.29 (dd,  $J=17.7, 11.1$ , 1H), 4.95 (dd,  $J=11.1, 2.0$ , 1H), 4.69 (dd,  $J=17.7, 2.0$ ,

1H), 4.17 (d,  $J=17.1$ , 1H), 4.09 (q,  $J=7.1$ , 2H), 3.13 (d,  $J=17.1$ , 1H), 2.22 (s, 2H), 1.97 – 1.81 (m, 2H), 1.46 (s, 6H), 1.17 (t,  $J=7.1$ , 3H).  $^{13}\text{C}$  NMR (100 MHz,  $\text{CDCl}_3$ )  $\delta$  = 200.89, 170.73, 152.91, 141.06, 136.43, 135.25, 135.14, 129.41, 127.65, 126.14, 124.86, 117.13, 66.71, 62.17, 41.01, 33.00, 32.40, 28.10, 27.29, 26.41, 14.04. ESI-HRMS calcd for  $[\text{C}_{21}\text{H}_{24}\text{O}_3+\text{Na}^+]$ : 347.1623, found 347.1618.

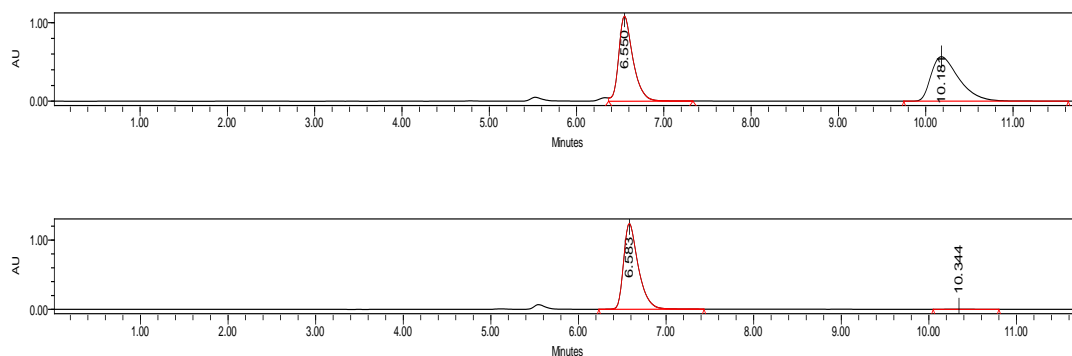

|   | Retention Time | Area     | % Area |   | Retention Time | Area     | % Area |
|---|----------------|----------|--------|---|----------------|----------|--------|
| 1 | 6.550          | 12285036 | 49.56  | 1 | 6.583          | 14373486 | 99.72  |
| 2 | 10.181         | 12501852 | 50.44  | 2 | 10.344         | 39740    | 0.28   |

**(R)-ethyl 2-(1-cyclopentylideneallyl)-1-oxo-2,3-dihydro-1H-indene-2-carboxylate (2n).**

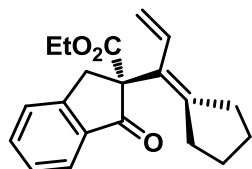

Reaction time: 52 h; Yield: 80%;  $[\alpha]_D^{25} = -428.2$  ( $c$  0.54,  $\text{CH}_2\text{Cl}_2$ , 99% ee); HPLC (Daicel chiralpak ID,  $n$ -hexane/ $i$ -PrOH 80/20, 1.0 mL/min,  $t_{\text{R}(\text{major})} = 7.95$  min,  $t_{\text{R}(\text{minor})} = 12.30$  min);  $^1\text{H}$  NMR (400 MHz,  $\text{CDCl}_3$ )  $\delta$  = 7.79 (d,  $J=7.7$ , 1H), 7.62 (td,  $J=7.6$ , 1.1, 1H), 7.50 (d,  $J=7.7$ , 1H), 7.39 (dd,  $J=11.4$ , 4.1, 1H), 6.51 (dd,  $J=18.0$ , 11.6, 1H), 4.96 (d,  $J=11.6$ , 1H), 4.83 (d,  $J=18.0$ , 1H), 4.32 (d,  $J=17.2$ , 1H), 4.20 – 4.10 (m, 2H), 3.21 (t,  $J=14.7$ , 1H), 2.64 – 2.42 (m, 1H), 2.27 (ddd,  $J=22.6$ , 15.8, 7.7, 2H), 1.69 – 1.52 (m, 4H), 1.45 – 1.36 (m, 1H), 1.22 (dd,  $J=11.3$ , 4.2, 3H).  $^{13}\text{C}$  NMR (100 MHz,  $\text{CDCl}_3$ )  $\delta$  = 200.21, 170.09, 153.57, 147.07, 136.68, 135.27, 134.97, 128.73, 127.74, 126.19, 124.94, 112.39, 67.13, 62.34, 40.15, 33.37, 33.09, 27.31, 25.72, 13.97. ESI-HRMS calcd for  $[\text{C}_{20}\text{H}_{22}\text{O}_3+\text{Na}^+]$ : 333.1467, found 333.1468.

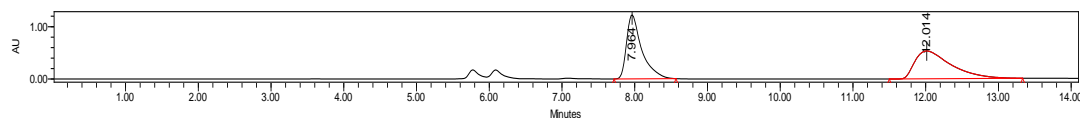

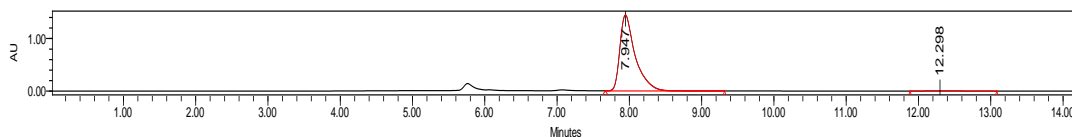

|   | Retention Time | Area     | % Area |   | Retention Time | Area     | % Area |
|---|----------------|----------|--------|---|----------------|----------|--------|
| 1 | 7.964          | 17820606 | 49.12  | 1 | 7.947          | 21382098 | 99.48  |
| 2 | 12.014         | 18457150 | 50.88  | 2 | 12.298         | 111098   | 0.52   |

**(R)-ethyl 2-(4-methylhexa-1,3-dien-3-yl)-1-oxo-2,3-dihydro-1H-indene-2-carboxylate (2o).**

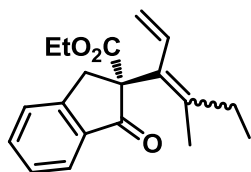

Reaction time: 52 h; Yield: 85%; mixture of *Z/E* isomer, *Z/E* = 1/1.5; The *Z* isomer was determined to be 99% ee by HPLC (Daicel Chiralpak ID, *n*-hexane/*i*-PrOH 90/10 1.0 mL/min,  $t_{R(\text{major})} = 7.56$  min,  $t_{R(\text{minor})} = 11.82$  min). The *E* isomer was determined to be 99% ee ( $t_{R(\text{major})} = 8.11$  min,  $t_{R(\text{minor})} = 14.32$  min).  $^1\text{H}$  NMR (400 MHz,  $\text{CDCl}_3$ )  $\delta = 7.76$  (d,  $J=7.7$ , 1H), 7.65 – 7.58 (m, 1H), 7.51 – 7.45 (m, 1H), 7.37 (t,  $J=7.5$ , 1H), 6.58 – 6.34 (m, 1H), 5.01 (ddd,  $J=20.6$ , 11.3, 1.6, 1H), 4.77 (dd,  $J=17.9$ , 1.6, 1H), 4.28 (dd,  $J=17.1$ , 7.3, 1H), 4.21 – 4.10 (m, 2H), 3.20 (d,  $J=17.1$ , 1H), 2.23 (tt,  $J=15.0$ , 7.5, 0.6H), 2.13 – 2.04 (m, 0.6H), 1.86 (ddd,  $J=14.6$ , 7.3, 1.9, 0.8H), 1.76 (d,  $J=0.9$ , 1.2H), 1.54 (d,  $J=1.2$ , 1.8H), 1.23 (td,  $J=7.1$ , 4.2, 3H), 0.97 (td,  $J=7.4$ , 2.6, 3H).  $^{13}\text{C}$  NMR (100 MHz,  $\text{CDCl}_3$ )  $\delta = 200.57$ , 200.51, 170.50, 170.32, 153.07, 152.81, 139.23, 138.37, 137.10, 136.44, 135.27, 135.25, 135.08, 135.06, 131.87, 131.51, 127.68, 126.16, 126.14, 124.91, 124.85, 116.16, 115.61, 67.11, 67.05, 62.19, 62.18, 41.05, 40.60, 29.20, 28.98, 20.09, 19.22, 14.00, 13.97, 12.72, 11.20. ESI-HRMS calcd for  $[\text{C}_{19}\text{H}_{22}\text{O}_3 + \text{Na}^+]$ : 321.1467, found 321.1465.

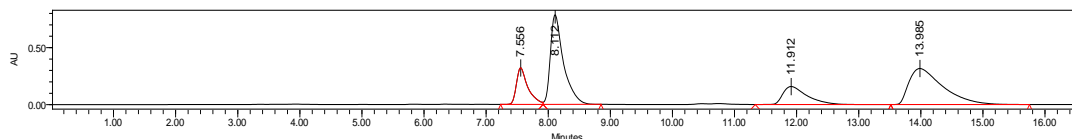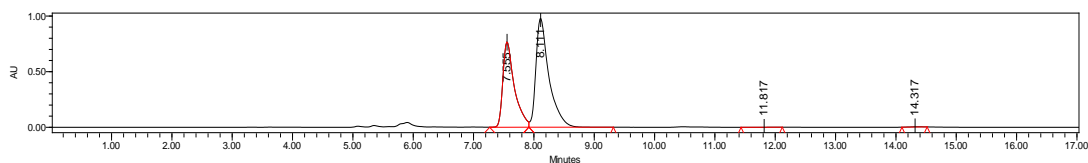

|   | Retention Time | Area     | % Area |   | Retention Time | Area     | % Area |
|---|----------------|----------|--------|---|----------------|----------|--------|
| 1 | 7.556          | 4117385  | 12.90  | 1 | 7.555          | 10149905 | 40.71  |
| 2 | 8.112          | 11557215 | 36.20  | 2 | 8.111          | 14743870 | 59.13  |
| 3 | 11.912         | 4275291  | 13.39  | 3 | 11.817         | 9726     | 0.04   |
| 4 | 13.985         | 11973868 | 37.51  | 4 | 14.317         | 30755    | 0.12   |

**(R)-ethyl 2-(4-methylpenta-1,3-dien-2-yl)-1-oxo-1,2,3,4-tetrahydro-naphthalene-2-carboxylate (2p).**

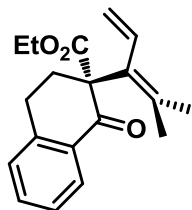

Reaction time: 72 h; Yield: 91%;  $[\alpha]_D^{30} = -72.1$  (*c* 0.39, CH<sub>2</sub>Cl<sub>2</sub>, 92% ee); HPLC (Daicel chiralpak ID, *n*-hexane/*i*-PrOH 90/10, 1.0 mL/min,  $t_{R(\text{major})} = 7.94$  min,  $t_{R(\text{minor})} = 8.60$  min); <sup>1</sup>H NMR (400 MHz, CDCl<sub>3</sub>)  $\delta = 7.99$  (d, *J*=7.8, 1H), 7.47 – 7.39 (m, 1H), 7.28 (t, *J*=7.5, 1H), 7.18 (d, *J*=7.6, 1H), 6.01 (dd, *J*=17.6, 11.1, 1H), 5.06 (dd, *J*=11.1, 2.1, 1H), 4.93 (dd, *J*=17.6, 2.1, 1H), 4.22 (qd, *J*=7.1, 1.2, 2H), 3.02 – 2.89 (m, 2H), 2.67 – 2.54 (m, 2H), 1.79 (s, 3H), 1.63 (d, *J*=1.1, 3H), 1.24 (t, *J*=7.1, 3H). <sup>13</sup>C NMR (100 MHz, CDCl<sub>3</sub>)  $\delta = 195.14, 172.07, 142.99, 136.57, 134.15, 133.21, 133.07, 129.06, 128.37, 128.16, 126.63, 118.81, 63.52, 61.41, 32.87, 26.12, 23.73, 22.49, 14.06$ . ESI-HRMS calcd for [C<sub>19</sub>H<sub>22</sub>O<sub>3</sub>+Na<sup>+</sup>]: 321.1467, found 321.1466.

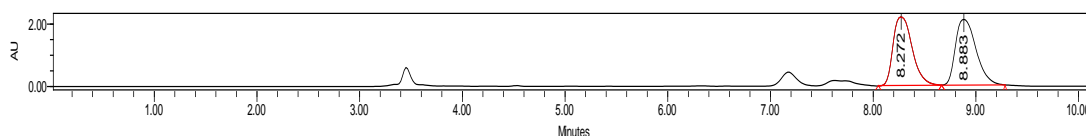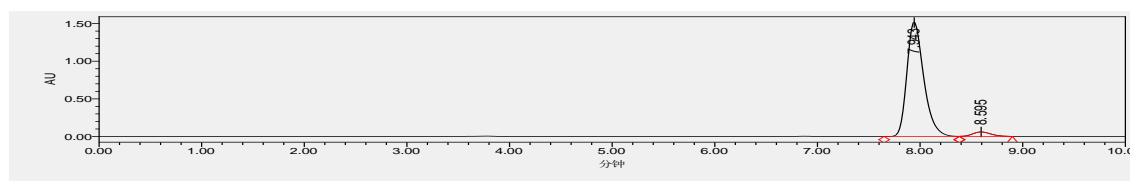

|   | Retention Time | Area     | % Area |   | Retention Time | Area     | % Area |
|---|----------------|----------|--------|---|----------------|----------|--------|
| 1 | 8.272          | 28412665 | 49.22  | 1 | 7.943          | 17297983 | 95.94  |
| 2 | 8.883          | 29308136 | 50.78  | 2 | 8.595          | 732187   | 4.06   |

**(R)-ethyl 6-methoxy-2-(4-methylpenta-1,3-dien-2-yl)-1-oxo-1,2,3,4-tetrahydronaphthalene-2-carboxylate (2q).**

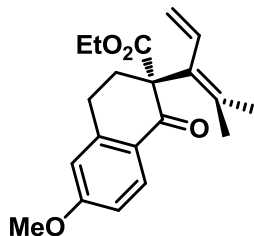

Reaction time: 32 h; Yield: 90%;  $[\alpha]_D^{25} = -112.2$  (*c* 0.62, CH<sub>2</sub>Cl<sub>2</sub>, 95% ee); HPLC (Daicel chiralpak IB, *n*-hexane/*i*-PrOH 99/1, 1.0 mL/min,  $t_{R(\text{major})} = 16.00$  min,  $t_{R(\text{minor})} = 19.91$  min); <sup>1</sup>H NMR (400 MHz, CDCl<sub>3</sub>)  $\delta = 7.90$  (d, *J*=8.8, 1H), 6.74 (dd, *J*=8.8, 2.5, 1H), 6.56 (d, *J*=2.4, 1H), 5.94 (dd, *J*=17.6, 11.1, 1H), 4.99 (dd, *J*=11.1, 2.2, 1H), 4.86 (dd, *J*=17.6, 2.2, 1H), 4.14 (q, *J*=7.1, 2H), 3.77 (s, 3H), 2.85 (t, *J*=6.1, 2H), 2.61 – 2.52 (m, 1H), 2.46 (dt, *J*=13.7, 5.9, 1H), 1.72 (s, 3H), 1.55 (d, *J*=1.3, 3H), 1.17 (t, *J*=7.1, 3H). <sup>13</sup>C NMR (100 MHz, CDCl<sub>3</sub>)  $\delta = 193.70, 172.15, 163.38, 145.58, 136.68, 133.85, 130.66, 129.55, 126.62, 118.66, 113.31, 112.08, 63.35, 61.41, 55.42, 32.93, 26.56, 23.74, 22.61, 14.10$ . ESI-HRMS calcd for

[C<sub>20</sub>H<sub>24</sub>O<sub>4</sub>+Na<sup>+</sup>]: 351.1572, found 351.1573.

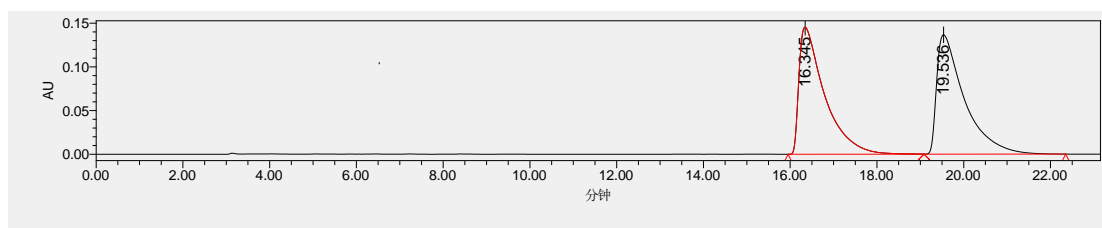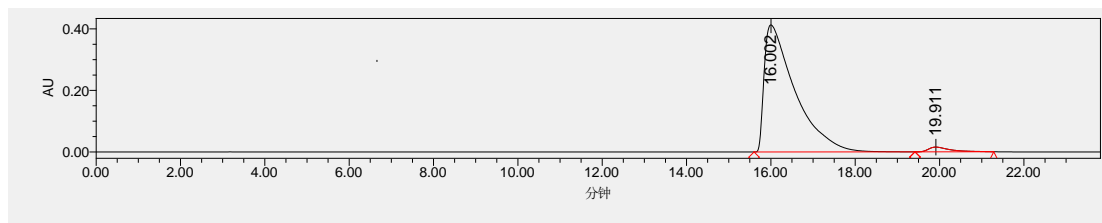

|   | Retention Time | Area    | % Area |   | Retention Time | Area     | % Area |
|---|----------------|---------|--------|---|----------------|----------|--------|
| 1 | 16.345         | 5948001 | 49.60  | 1 | 16.002         | 20892718 | 97.50  |
| 2 | 19.536         | 6043842 | 50.40  | 2 | 19.911         | 536093   | 2.50   |

**(R)-ethyl 7-methoxy-2-(4-methylpenta-1,3-dien-2-yl)-1-oxo-1,2,3,4-tetrahydro-naphthalene-2-carboxylate (2r).**

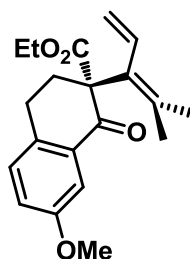

Reaction time: 48 h; Yield: 80%; [ $\alpha$ ]<sub>D</sub><sup>25</sup> = -108.5 (c 0.54, CH<sub>2</sub>Cl<sub>2</sub>, 92% ee); HPLC (Daicel chiralpak IE, *n*-hexane/*i*-PrOH 90/10, 1.0 mL/min,  $t_{R(\text{major})}$  = 13.82 min,  $t_{R(\text{minor})}$  = 13.09 min); <sup>1</sup>H NMR (400 MHz, CDCl<sub>3</sub>)  $\delta$  = 7.41 (d,  $J$ =2.7, 1H), 7.02 (d,  $J$ =8.4, 1H), 6.95 (dd,  $J$ =8.4, 2.8, 1H), 5.93 (dd,  $J$ =17.6, 11.1, 1H), 5.01 (dd,  $J$ =11.1, 2.2, 1H), 4.86 (dd,  $J$ =17.6, 2.2, 1H), 4.22 – 4.03 (m, 2H), 3.75 (s, 3H), 2.89 – 2.71 (m, 2H), 2.59 – 2.38 (m, 2H), 1.72 (s, 3H), 1.56 (d,  $J$ =1.2, 3H), 1.17 (t,  $J$ =7.1, 3H). <sup>13</sup>C NMR (100 MHz, CDCl<sub>3</sub>)  $\delta$  = 195.04, 172.15, 158.29, 136.58, 135.65, 134.09, 133.90, 129.60, 129.11, 121.54, 118.89, 110.01, 63.34, 61.44, 55.44, 33.23, 25.39, 23.73, 22.54, 14.09. ESI-HRMS calcd for [C<sub>20</sub>H<sub>24</sub>O<sub>4</sub>+Na<sup>+</sup>]: 351.1572, found 351.1574.

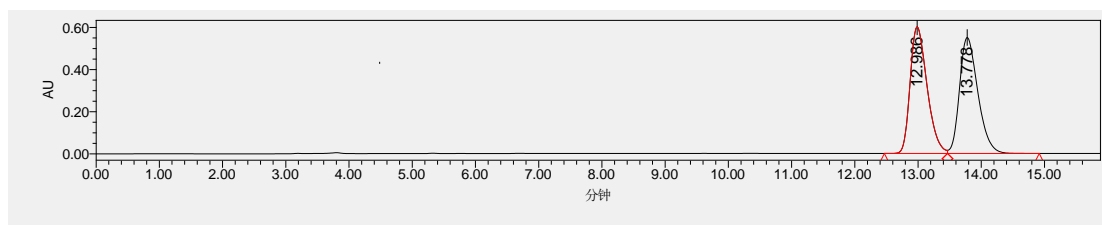



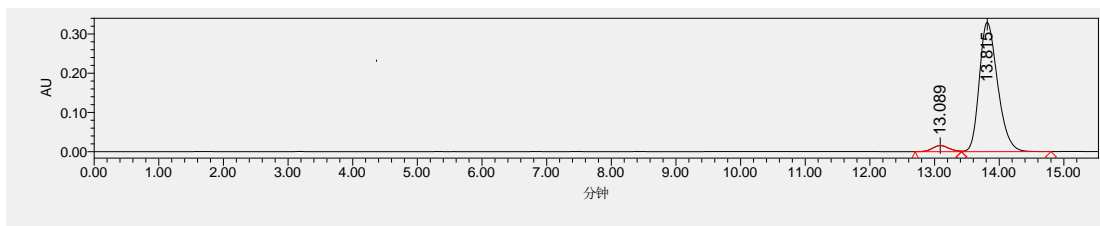

| Retention Time | Area   | % Area   | Retention Time | Area | % Area |         |       |
|----------------|--------|----------|----------------|------|--------|---------|-------|
| 1              | 12986  | 11165257 | 50.21          | 1    | 13.089 | 276315  | 4.09  |
| 2              | 13.778 | 11073825 | 49.79          | 2    | 13.815 | 6479634 | 95.91 |

**(R)-ethyl 6,7-dimethyl-2-(4-methylpenta-1,3-dien-2-yl)-1-oxo-1,2,3,4-tetrahydronaphthalene-2-carboxylate (2s).**

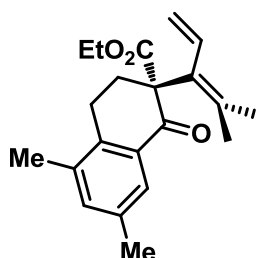

Reaction time: 96 h; Yield: 78%;  $[\alpha]_D^{25} = -113.7$  ( $c$  0.52,  $\text{CH}_2\text{Cl}_2$ , 90% ee); HPLC (Daicel chiralpak IC,  $n$ -hexane/ $i$ -PrOH 99/1, 1.0 mL/min,  $t_{R(\text{major})} = 11.12$  min,  $t_{R(\text{minor})} = 13.69$  min);  $^1\text{H}$  NMR (400 MHz,  $\text{CDCl}_3$ )  $\delta = 7.58$  (s, 1H), 7.07 (s, 1H), 5.92 (dd,  $J=17.6, 11.1$ , 1H), 4.98 (dd,  $J=11.1, 2.2$ , 1H), 4.85 (dd,  $J=17.6, 2.1$ , 1H), 4.21 – 4.05 (m, 2H), 2.69 (t,  $J=6.0$ , 2H), 2.57 – 2.46 (m, 2H), 2.24 (s, 3H), 2.16 (s, 3H), 1.71 (s, 3H), 1.55 (d,  $J=1.2$ , 3H), 1.17 (t,  $J=7.1$ , 3H).  $^{13}\text{C}$  NMR (100 MHz,  $\text{CDCl}_3$ )  $\delta = 195.97, 172.21, 138.48, 136.57, 135.76, 135.73, 135.52, 134.11, 133.26, 128.95, 126.11, 118.58, 63.05, 61.35, 32.12, 23.76, 23.26, 22.46, 20.90, 19.11, 14.10$ . ESI-HRMS calcd for  $[\text{C}_{21}\text{H}_{26}\text{O}_3 + \text{Na}^+]$ : 349.1780, found 349.1778.

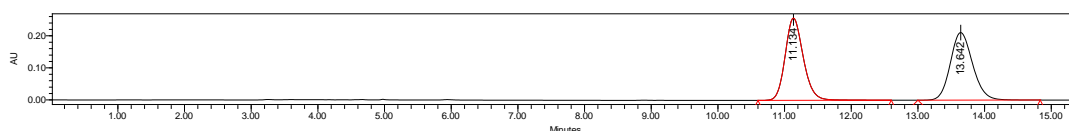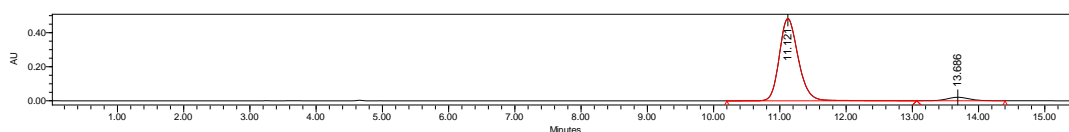

| Retention Time | Area   | % Area  | Retention Time | Area | % Area |         |       |
|----------------|--------|---------|----------------|------|--------|---------|-------|
| 1              | 11.134 | 4837151 | 49.68          | 1    | 11.121 | 9579969 | 95.15 |
| 2              | 13.642 | 4898795 | 50.32          | 2    | 13.686 | 488452  | 4.85  |

**ethyl 3-cyclohexylidene-2-(hydroxy(phenyl)methylene)pent-4-enoate (2t).**

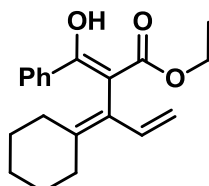

Reaction time: 11 h; Temperature: 35 °C; Yield: 87%;  $^1\text{H}$  NMR (400 MHz,

CDCl<sub>3</sub>)  $\delta$  = 13.53 (s, 1H), 7.68 – 7.51 (m, 2H), 7.36 – 7.24 (m, 3H), 6.90 (dd,  $J$ =17.0, 10.6, 1H), 5.15 – 4.97 (m, 2H), 4.22 (q,  $J$ =7.1, 2H), 2.36 – 2.20 (m, 2H), 2.04 – 1.88 (m, 2H), 1.56 – 1.48 (m, 1H), 1.44 – 1.28 (m, 4H), 1.24 (t,  $J$ =7.1, 3H), 0.83 – 0.69 (m, 1H). <sup>13</sup>C NMR (100 MHz, CDCl<sub>3</sub>)  $\delta$  = 173.90, 170.58, 143.90, 135.25, 134.76, 129.84, 128.02, 127.50, 124.88, 113.59, 99.96, 60.63, 32.89, 30.18, 27.28, 26.76, 26.64, 14.25. ESI-HRMS calcd for [C<sub>20</sub>H<sub>24</sub>O<sub>3</sub>+Na<sup>+</sup>]: 335.1623, found 335.1622.

**(1*R*,2*R*)-ethyl 5-bromo-1-hydroxy-1-methyl-2-(4-methylpenta-1,3-dien-3-yl)-2,3-dihydro-1*H*-indene-2-carboxylate (3).**

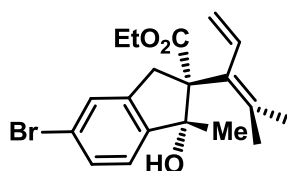

Yield: 82%; 19:1 d.r.; 98% ee; HPLC (Daicel chiralpak ID, *n*-hexane/*i*-PrOH 90/10, 1.0 mL/min,  $t_{R(\text{major})}$  = 11.52 min,  $t_{R(\text{minor})}$  = 6.19 min); <sup>1</sup>H NMR (400 MHz, CDCl<sub>3</sub>)  $\delta$  = 7.35 (d,  $J$ =8.0, 1H), 7.26 (s, 1H), 7.14 (d,  $J$ =8.0, 1H), 5.96 (dd,  $J$ =17.7, 11.0, 1H), 5.14 (dd,  $J$ =11.0, 2.4, 1H), 4.79 (dd,  $J$ =17.8, 2.4, 1H), 4.28 – 4.12 (m, 2H), 3.64 (d,  $J$ =15.9, 1H), 3.24 (s, 1H), 3.14 (d,  $J$ =15.9, 1H), 1.72 (dd,  $J$ =6.4, 1.0, 6H), 1.43 (s, 3H), 1.29 (t,  $J$ =7.1, 3H). <sup>13</sup>C NMR (100 MHz, CDCl<sub>3</sub>)  $\delta$  = 174.51, 147.51, 140.83, 139.12, 134.18, 133.56, 130.29, 127.71, 123.24, 121.45, 120.14, 84.07, 67.00, 60.94, 41.76, 26.47, 24.22, 22.08, 14.24. ESI-HRMS calcd for [C<sub>19</sub>H<sub>23</sub><sup>79</sup>BrO<sub>3</sub>+K<sup>+</sup>]: 417.0468, found 417.0466; calcd for [C<sub>19</sub>H<sub>23</sub><sup>81</sup>BrO<sub>3</sub>+K<sup>+</sup>]: 419.0447, found 419.0446;

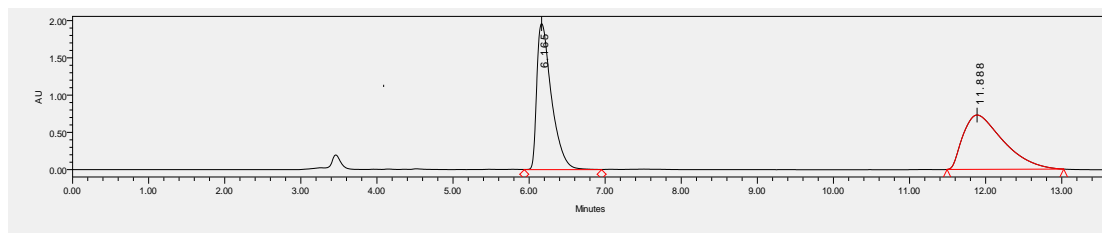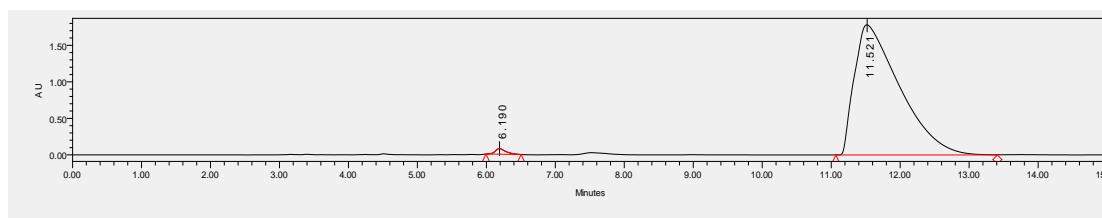

|   | Retention Time | Area     | % Area |   | Retention Time | Area     | % Area |
|---|----------------|----------|--------|---|----------------|----------|--------|
| 1 | 6.165          | 26273886 | 49.57  | 1 | 6.190          | 835821   | 1.02   |
| 2 | 11.888         | 26729499 | 50.43  | 2 | 11.521         | 81141157 | 98.98  |

**(*R,E*)-5'-bromo-4-(2-iodoethylidene)-5,5-dimethyl-4,5-dihydro-2*H*-spiro[furan-3,2'-indene]-1',2(3'*H*)-dione (4).**

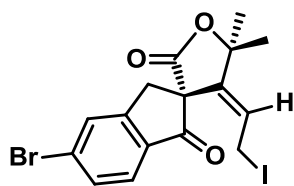

Yield: 85%; 5:1 mixture of *E/Z*-isomers; The *E*-isomer was determined to be 98% ee by HPLC (Daicel chiralcel IA, *n*-hexane/*i*-PrOH 90/10, 1.0 mL/min,  $t_{R(\text{major})} = 7.94$  min,  $t_{R(\text{minor})} = 9.50$  min). The *Z*-isomer was determined to be 68% ee by HPLC (Daicel chiralcel IA, *n*-hexane/*i*-PrOH 90/10, 1.0 mL/min,  $t_{R(\text{major})} = 7.17$  min,  $t_{R(\text{minor})} = 8.45$  min).

for the *E*-isomer:  $^1\text{H}$  NMR (400 MHz,  $\text{CDCl}_3$ )  $\delta = 7.79$  (s, 1H), 7.71 – 7.60 (m, 2H), 5.79 (dd,  $J=11.0, 7.4$ , 1H), 3.72 (dd,  $J=43.0, 17.8$ , 2H), 3.55 (dd,  $J=9.9, 7.4$ , 1H), 3.13 (dd,  $J=10.9, 10.0$ , 1H), 1.68 (s, 3H), 1.57 (s, 3H).  $^{13}\text{C}$  NMR (100 MHz,  $\text{CDCl}_3$ )  $\delta = 198.93, 174.22, 155.10, 148.16, 134.39, 133.62, 133.32, 131.10, 127.75, 123.84, 87.99, 62.36, 38.05, 29.92, 29.33, 0.00$ . ESI-HRMS calcd for  $[\text{C}_{16}\text{H}_{14}^{79}\text{BrIO}_3+\text{Na}^+]$ : 482.9069, found 482.9065; calcd for  $[\text{C}_{16}\text{H}_{14}^{81}\text{BrIO}_3+\text{Na}^+]$ : 484.9048, found 484.9044.

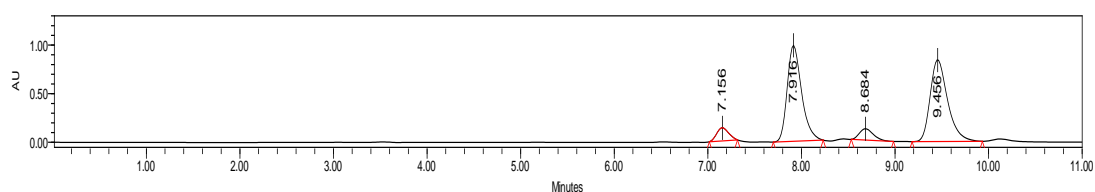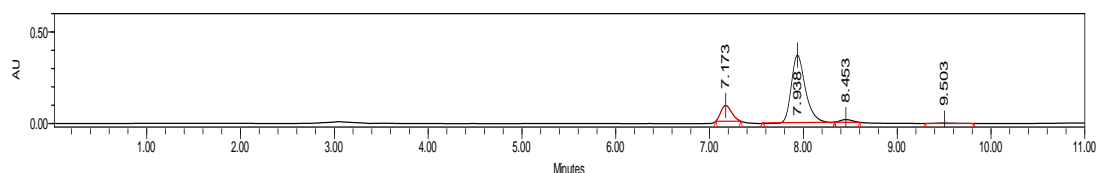

|   | Retention Time | Area     | % Area |   | Retention Time | Area    | % Area |
|---|----------------|----------|--------|---|----------------|---------|--------|
| 1 | 7.156          | 1196703  | 5.03   | 1 | 7.173          | 688103  | 14.65  |
| 2 | 7.916          | 10501527 | 44.18  | 2 | 7.938          | 3851013 | 81.98  |
| 3 | 8.684          | 1211236  | 5.10   | 3 | 8.453          | 130174  | 2.77   |
| 4 | 9.456          | 10859045 | 45.69  | 4 | 9.503          | 28236   | 0.60   |

**(1*R*,2*S*)-5-bromo-2-(hydroxymethyl)-2-(4-methylpenta-1,3-dien-3-yl)-2,3-dihydro-1*H*-inden-1-ol (5).**

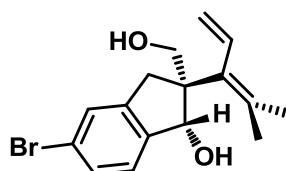

Yield: 82%; 4.9:1 d.r.; The major diastereomer was determined to be

98% ee by HPLC (Daicel chiralcel IE, *n*-hexane/*i*-PrOH 80/20, 1.0 mL/min,  $t_{R(\text{major})} = 9.96$  min,  $t_{R(\text{minor})} = 7.84$  min). The minor diastereomer was determined to be 97% ee ( $t_{R(\text{major})} = 6.49$  min,  $t_{R(\text{minor})} = 5.80$  min).  $^1\text{H}$  NMR (400 MHz,  $\text{CDCl}_3$ )  $\delta = 7.42 - 7.27$  (m, 2.46H), 7.26 - 7.13 (m, 0.58H), 6.45 (dd,  $J=17.8, 11.1, 0.17\text{H}$ ), 6.33 (dd,  $J=17.7, 11.1, 0.83\text{H}$ ), 5.45 (s, 0.17H), 5.35 (ddd,  $J=11.1, 6.6, 2.3, 1\text{H}$ ), 5.03 (ddd,  $J=17.7, 9.7, 2.3, 1\text{H}$ ), 4.93 (s, 0.83H), 3.89 (d,  $J=11.5, 0.17\text{H}$ ), 3.71 (d,  $J=11.4, 0.17\text{H}$ ), 3.62 (d,  $J=10.9, 0.83\text{H}$ ), 3.40 (dd,  $J=16.1, 0.7, 0.83\text{H}$ ), 3.26 (dd,  $J=26.1, 13.7, 1\text{H}$ ), 3.16 (s, 0.17H), 3.03 (d,  $J=16.2, 0.83\text{H}$ ), 2.17 (s, 1H), 2.01 (d,  $J=1.4, 2.49\text{H}$ ), 1.91 (d,  $J=0.9, 2.50\text{H}$ ), 1.88 (d,  $J=1.5, 0.51\text{H}$ ), 1.79 (d,  $J=1.0, 0.51\text{H}$ ), 1.66 - 1.55 (br, 1H).  $^{13}\text{C}$  NMR (100 MHz,  $\text{CDCl}_3$ )  $\delta = 144.89, 142.34, 141.60, 139.29, 138.99, 135.03, 134.10, 132.02, 131.80, 130.04, 129.90, 128.38, 127.19, 126.99, 125.17, 122.92, 121.76, 118.68, 81.38, 77.45, 66.98, 66.65, 59.75, 57.06, 41.47, 39.51, 25.20, 24.75, 22.33, 22.29$ . ESI-HRMS calcd for  $[\text{C}_{16}\text{H}_{19}^{79}\text{BrO}_2+\text{Na}^+]$ : 345.0466, found 345.0464; calcd for  $[\text{C}_{16}\text{H}_{19}^{81}\text{BrO}_2+\text{Na}^+]$ : 347.0446, found 347.0453.

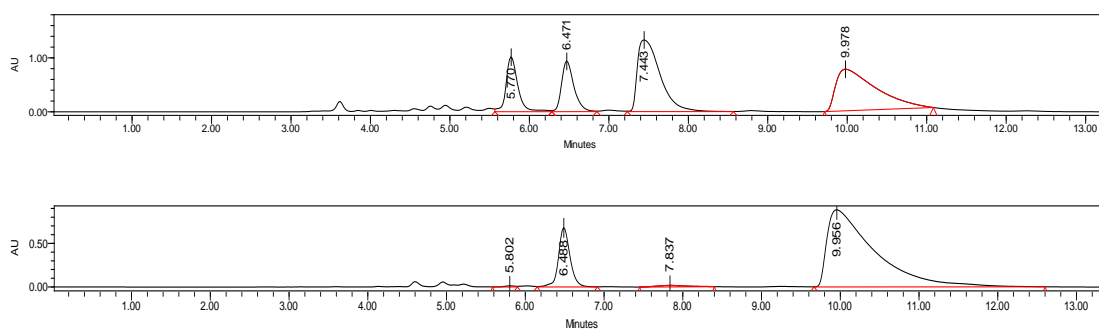

|   | Retention Time | Area     | % Area |   | Retention Time | Area     | % Area |
|---|----------------|----------|--------|---|----------------|----------|--------|
| 1 | 5.770          | 10472851 | 14.14  | 1 | 5.802          | 105366   | 0.24   |
| 2 | 6.471          | 10149362 | 13.70  | 2 | 6.488          | 6924894  | 15.61  |
| 3 | 7.443          | 26360194 | 35.59  | 3 | 7.837          | 326145   | 0.74   |
| 4 | 9.978          | 27076700 | 36.56  | 4 | 9.956          | 37000784 | 83.42  |

## X. Copies of NMR spectral for substrate and product

1a

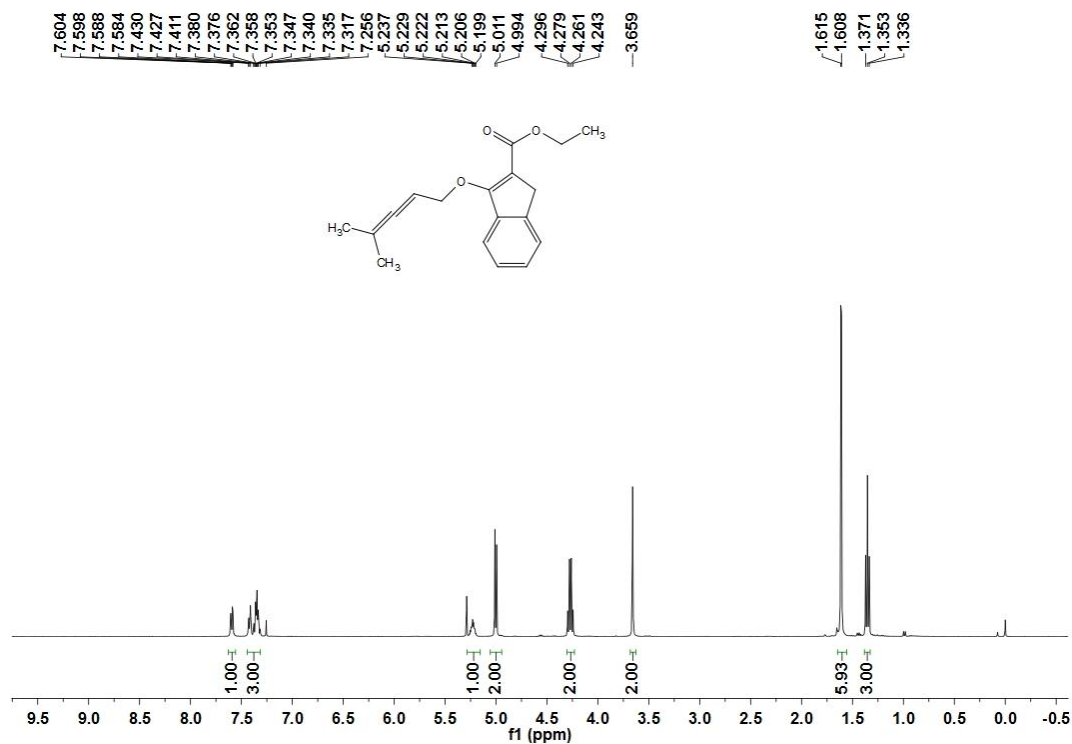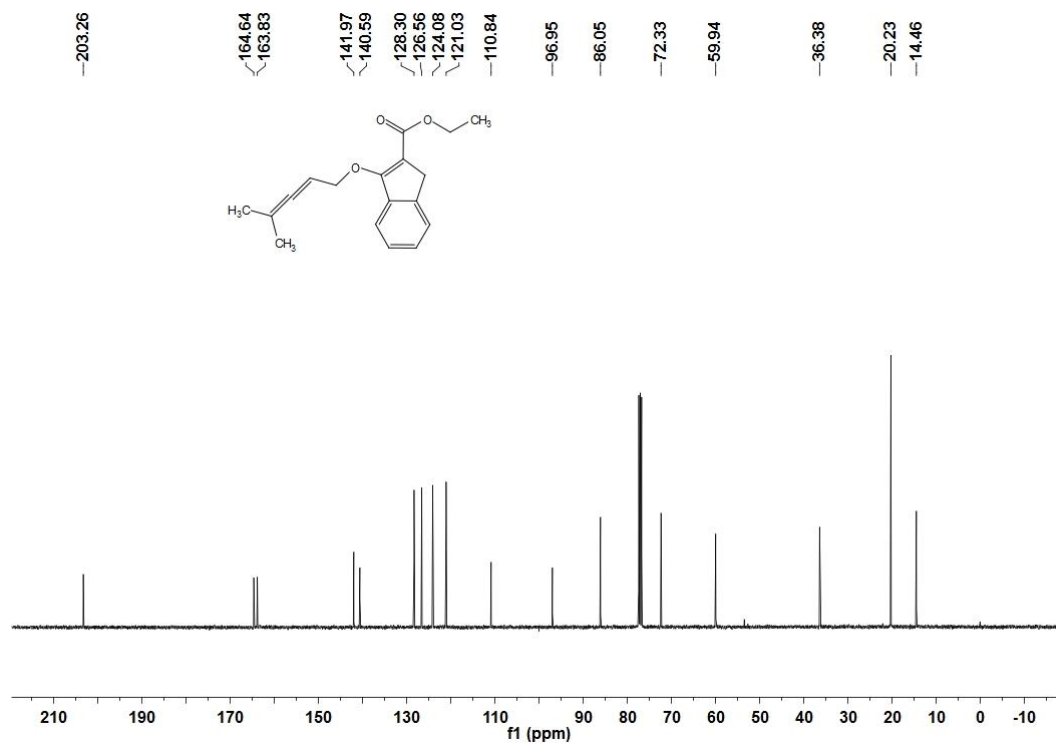

1b

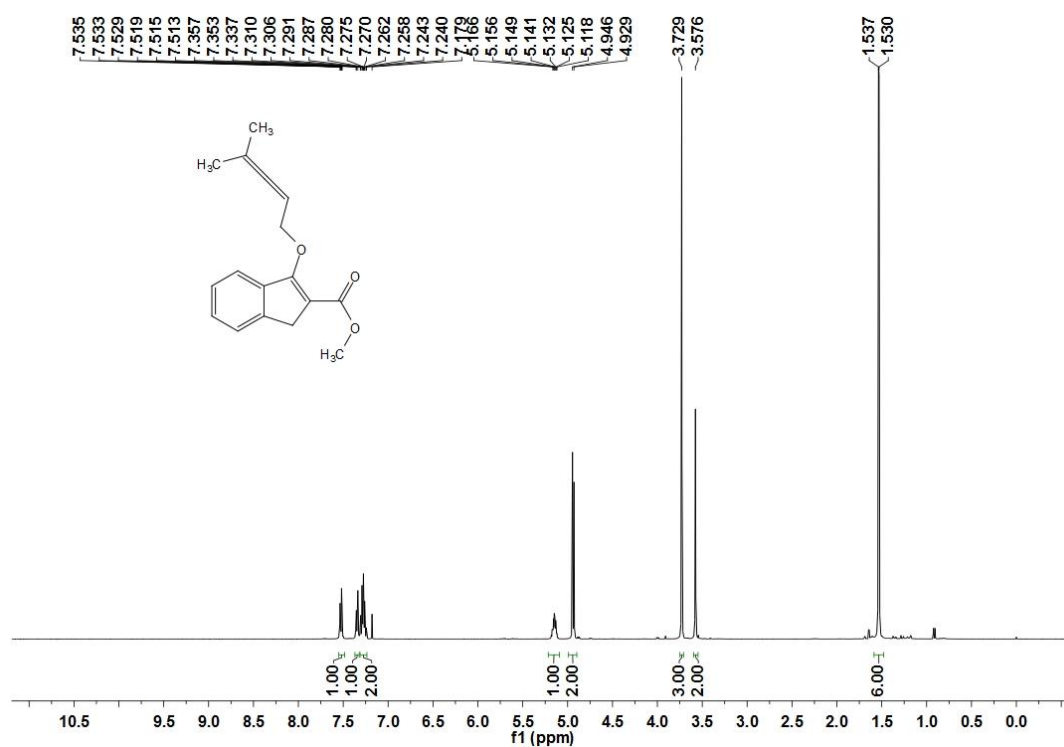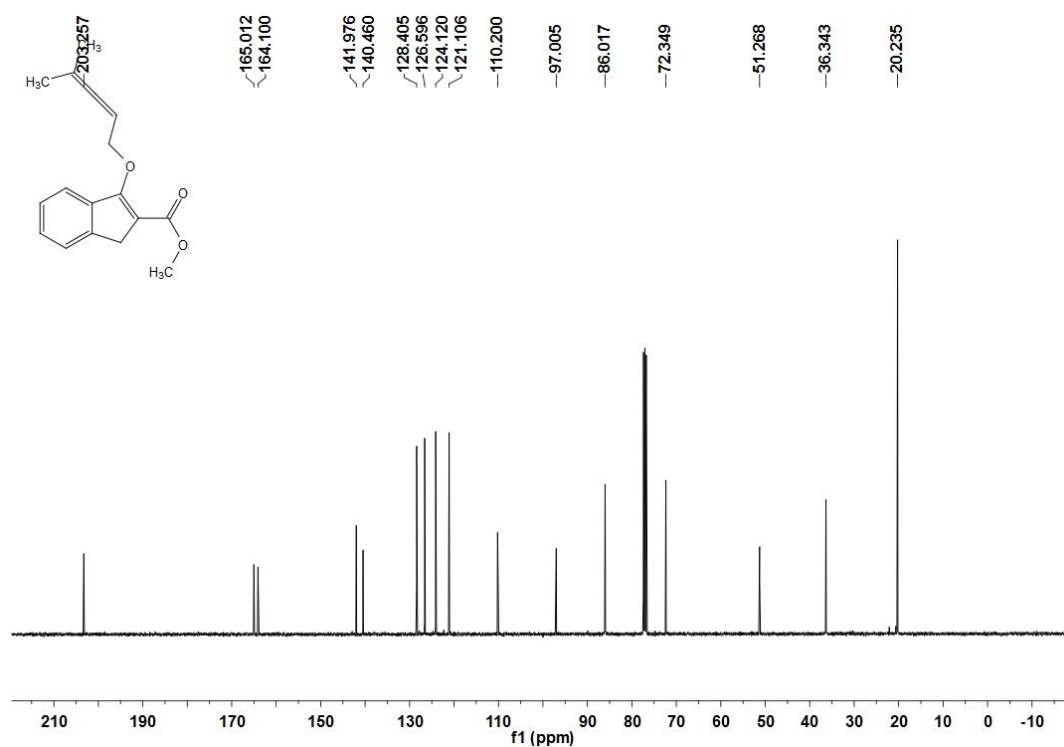

1c

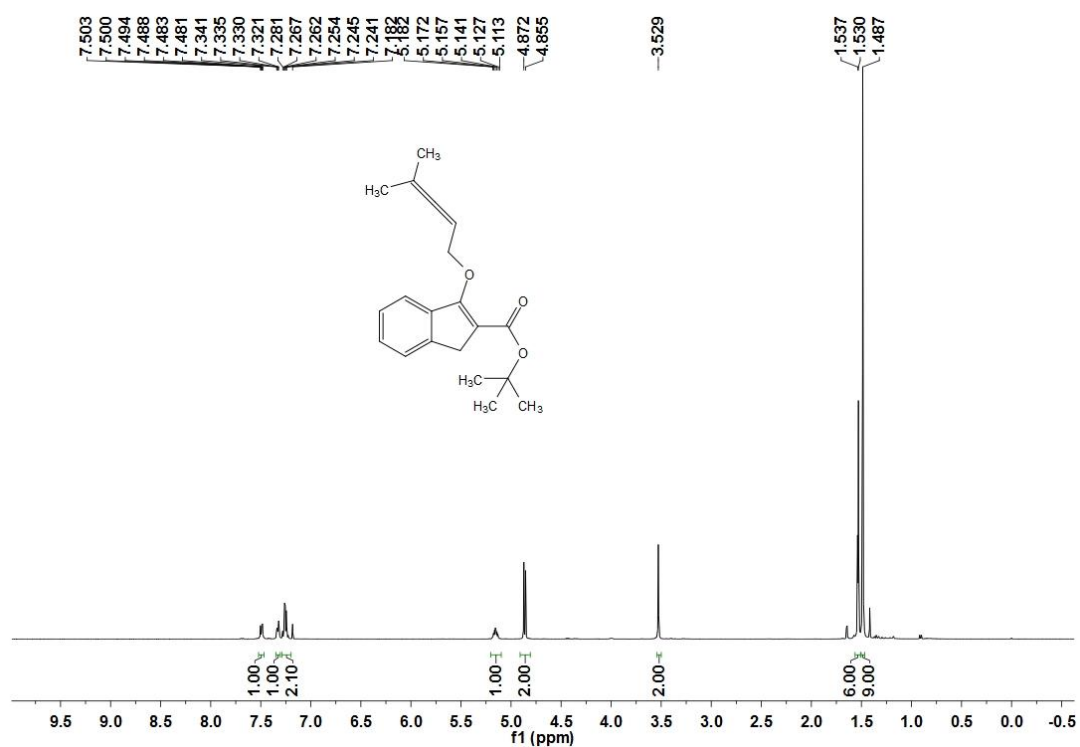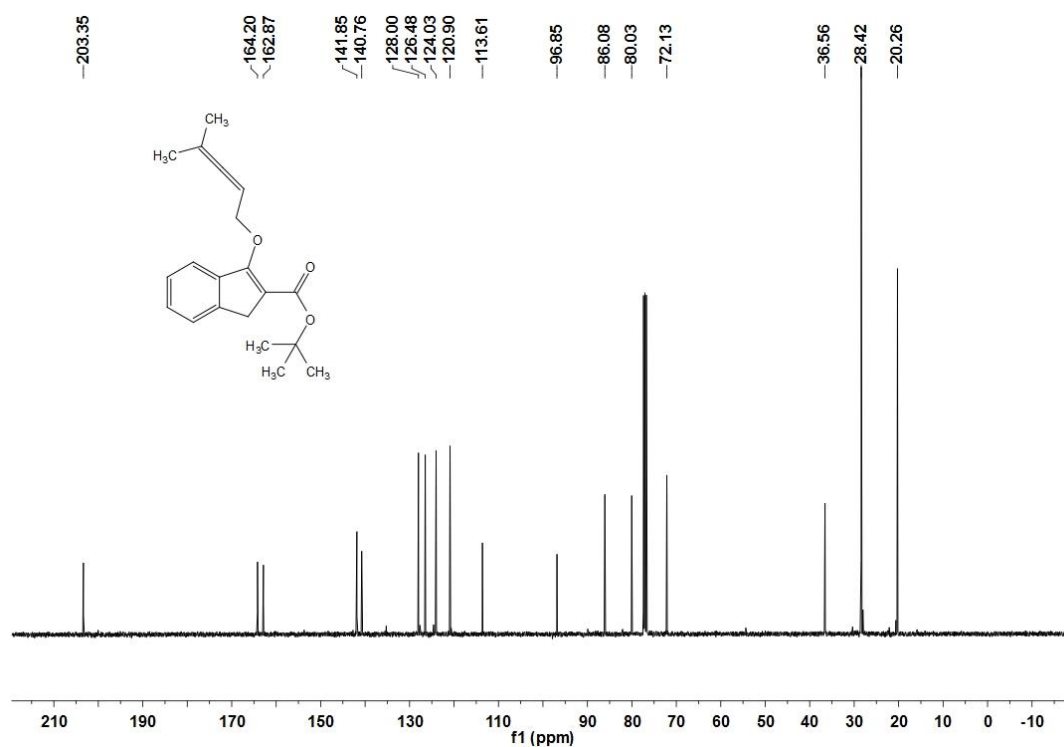

1d

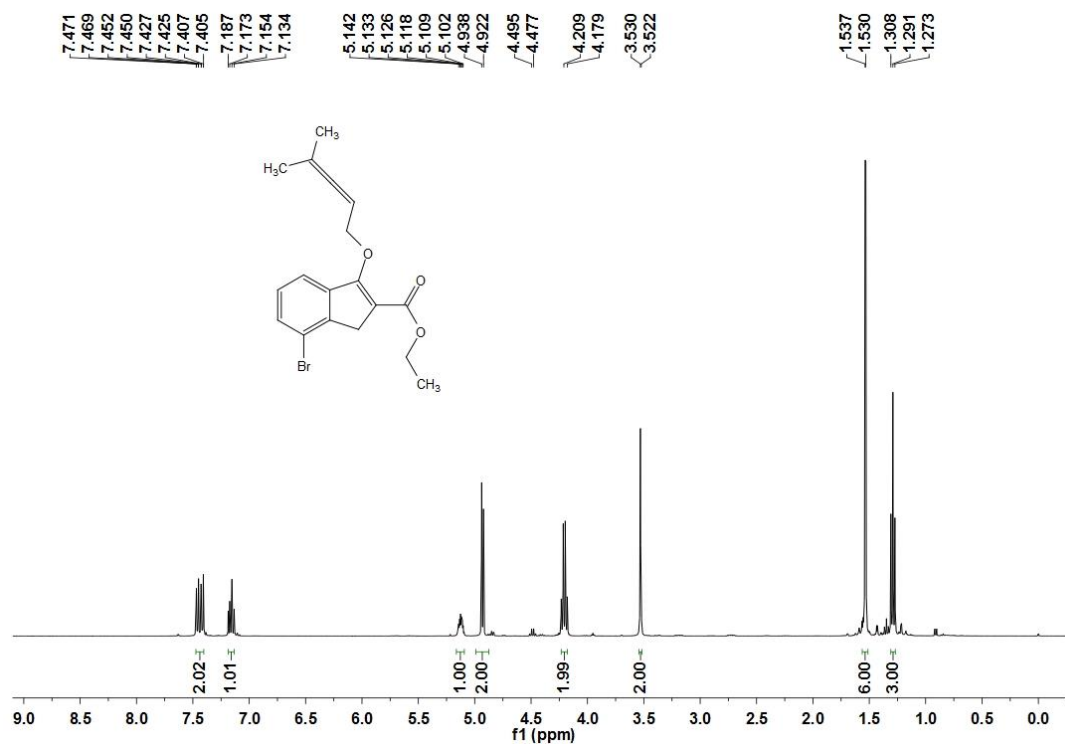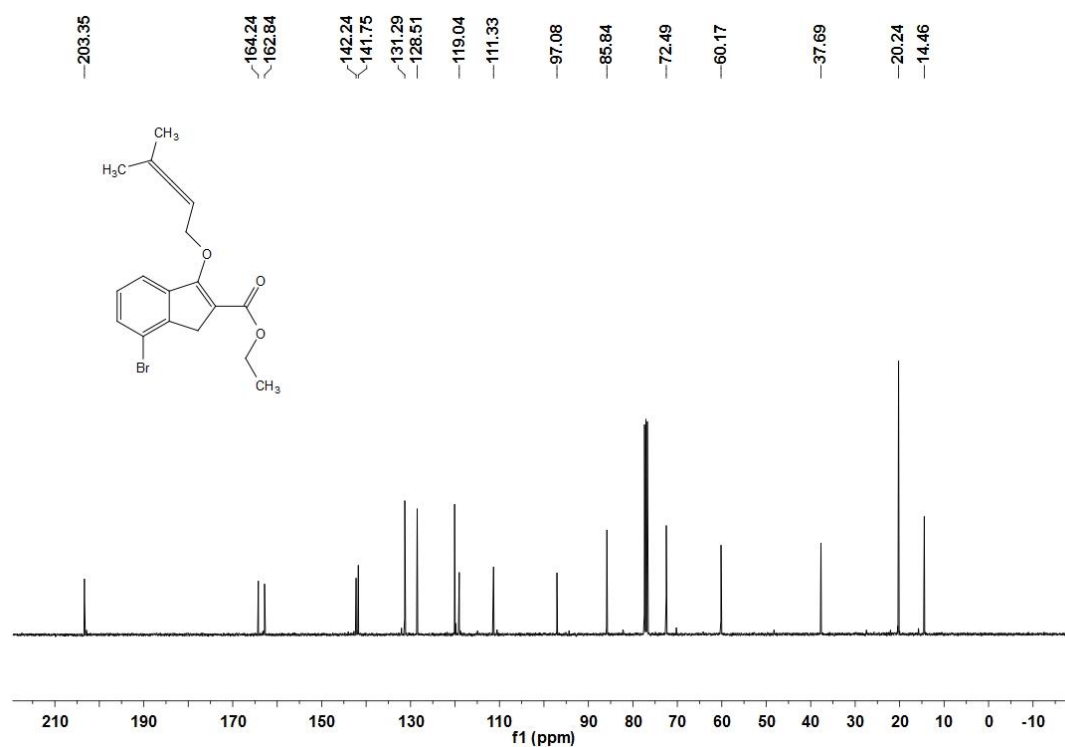



1e

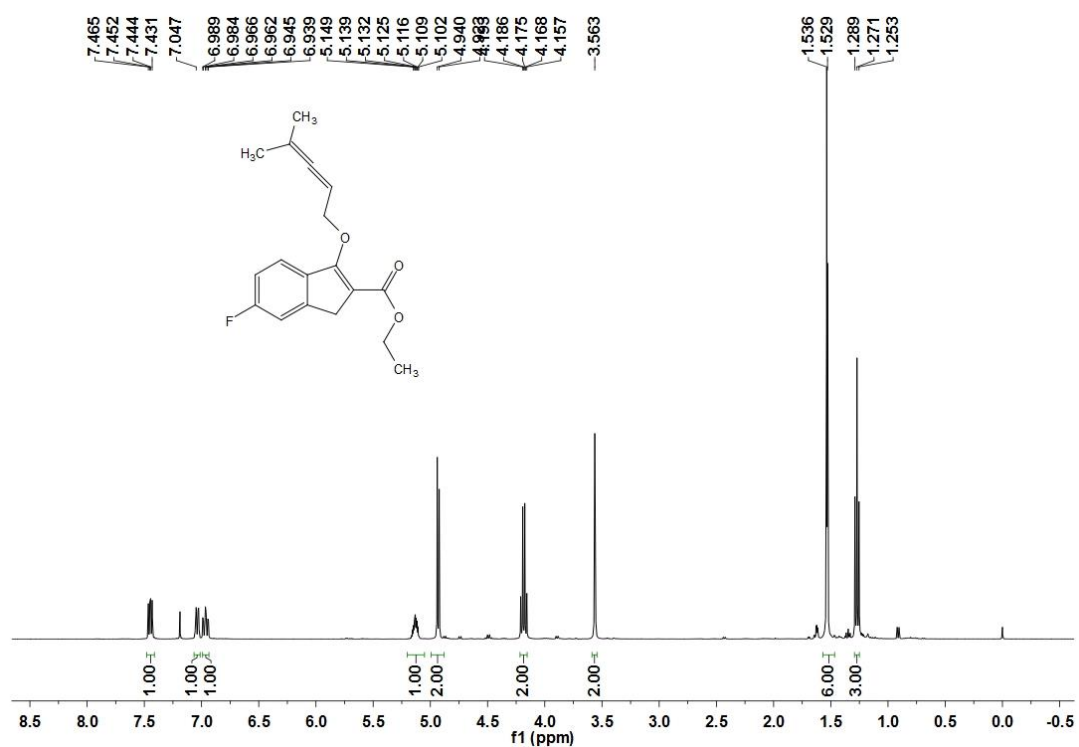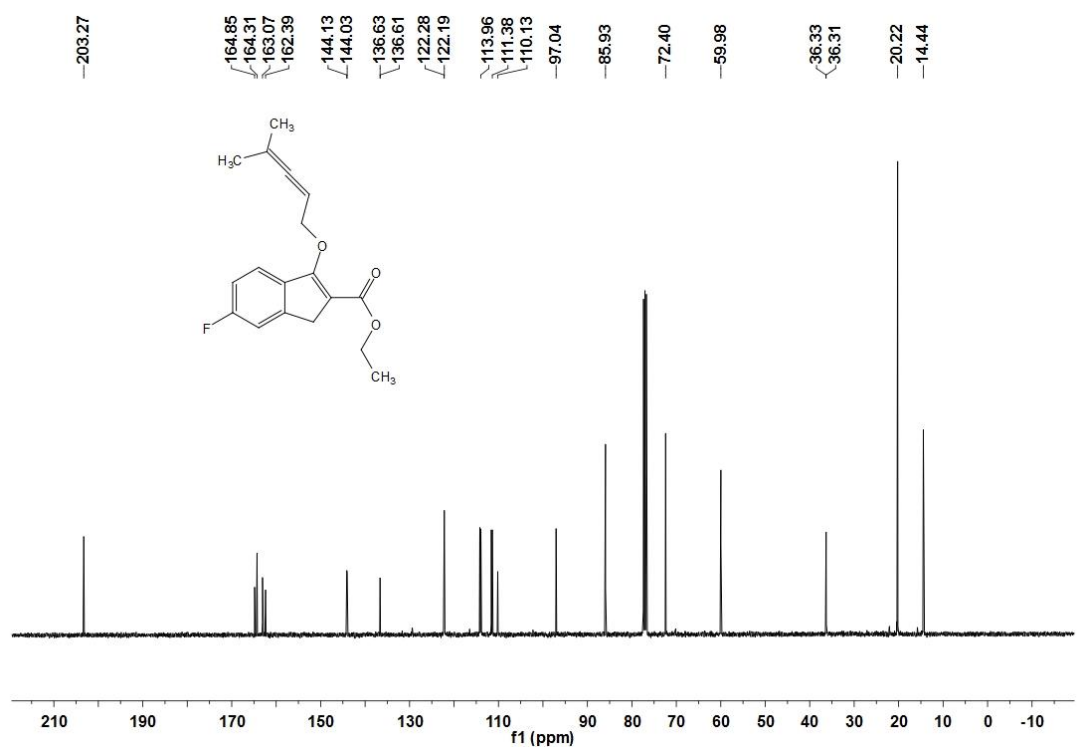

1f

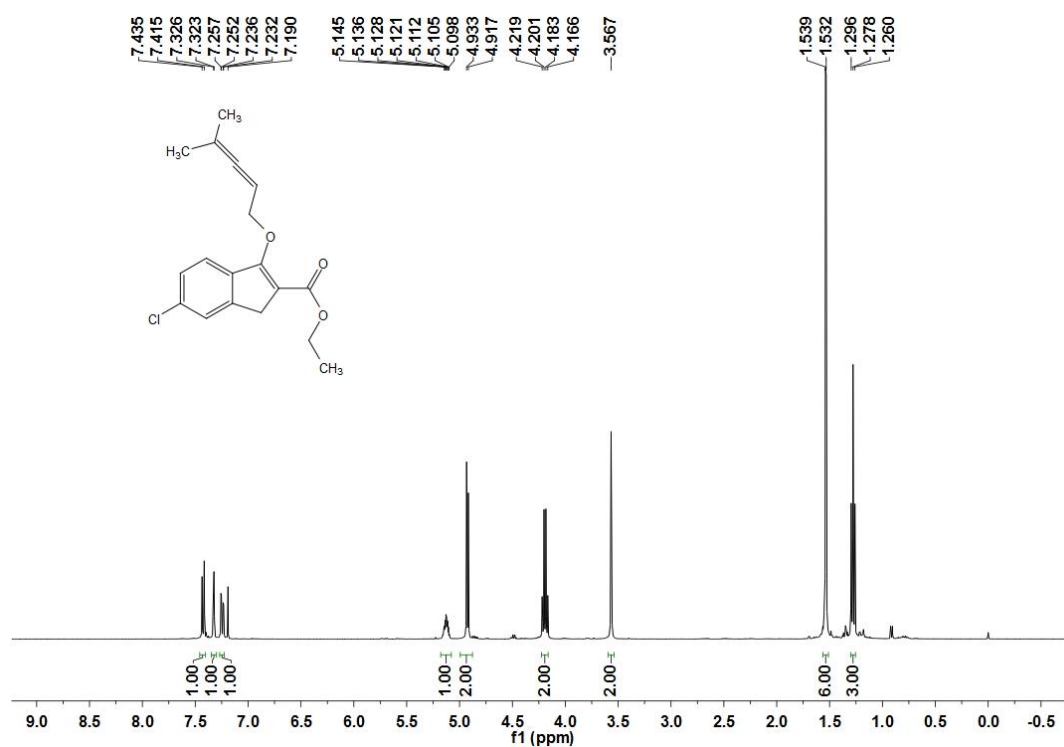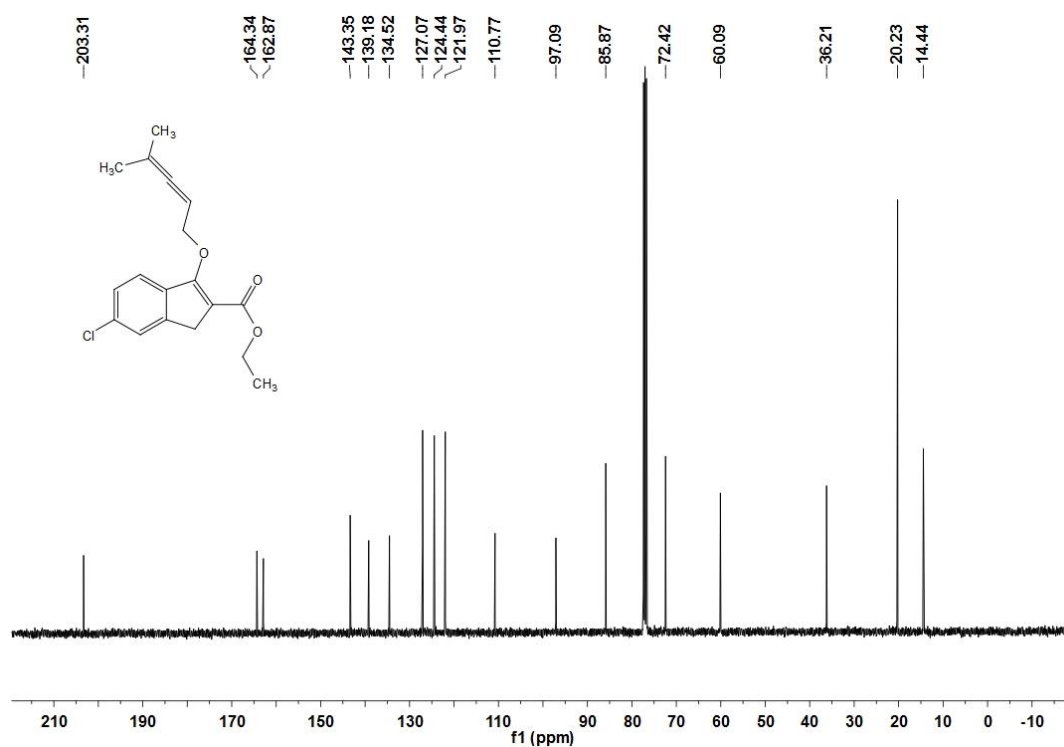

1g

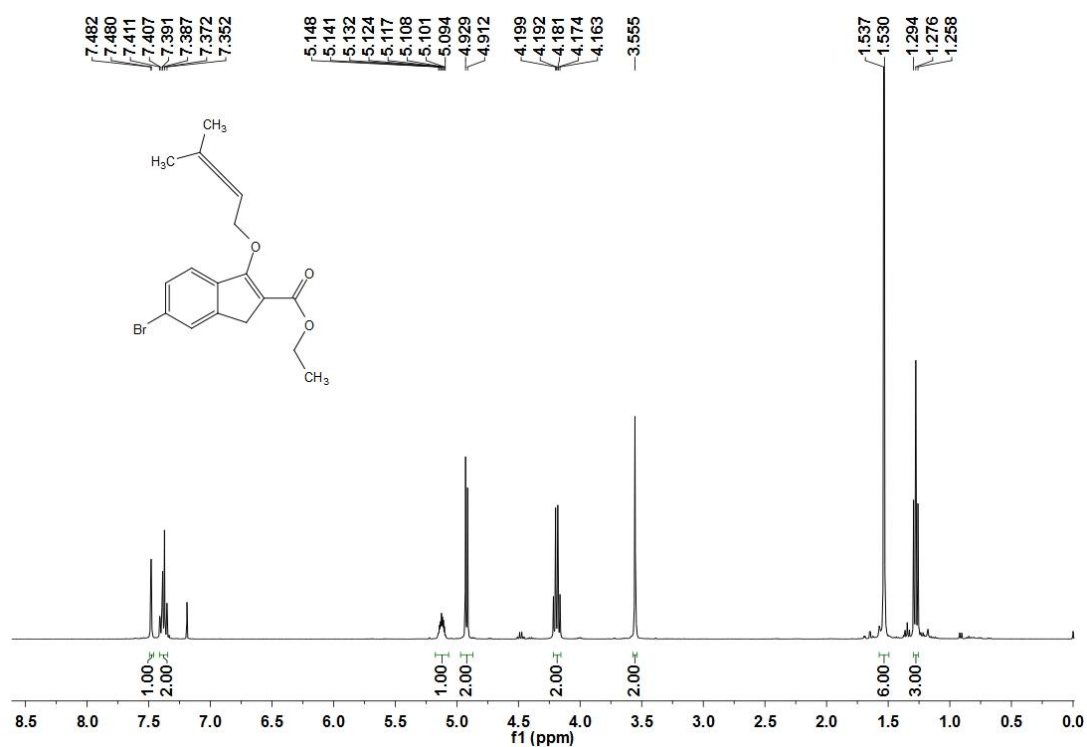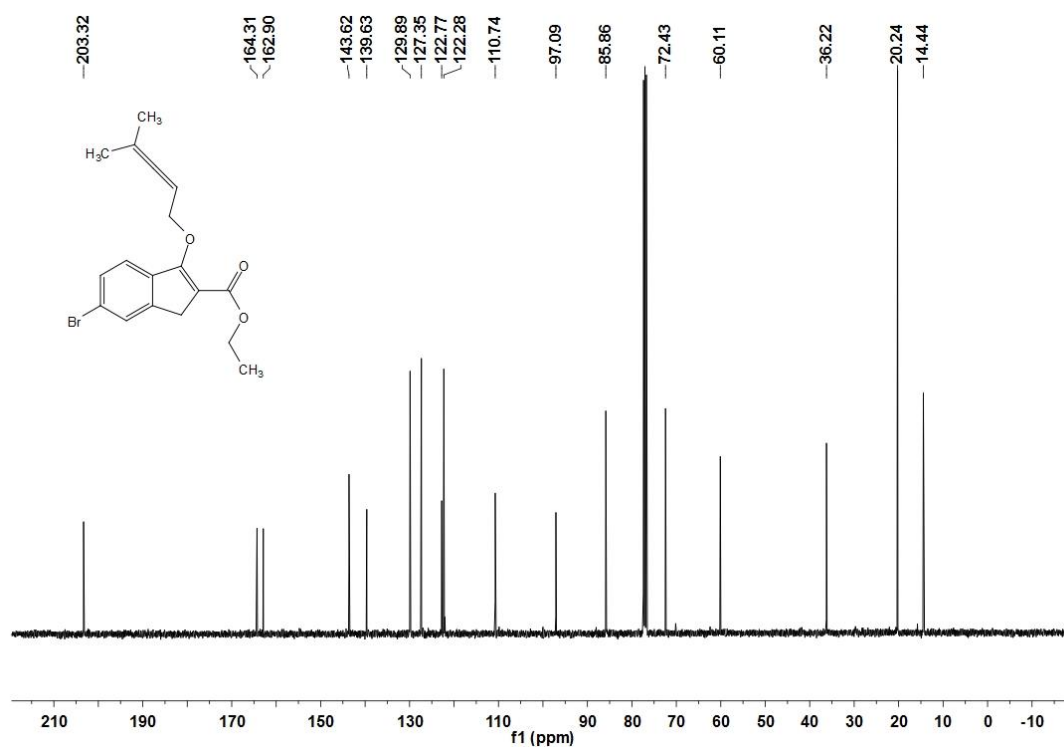

1h

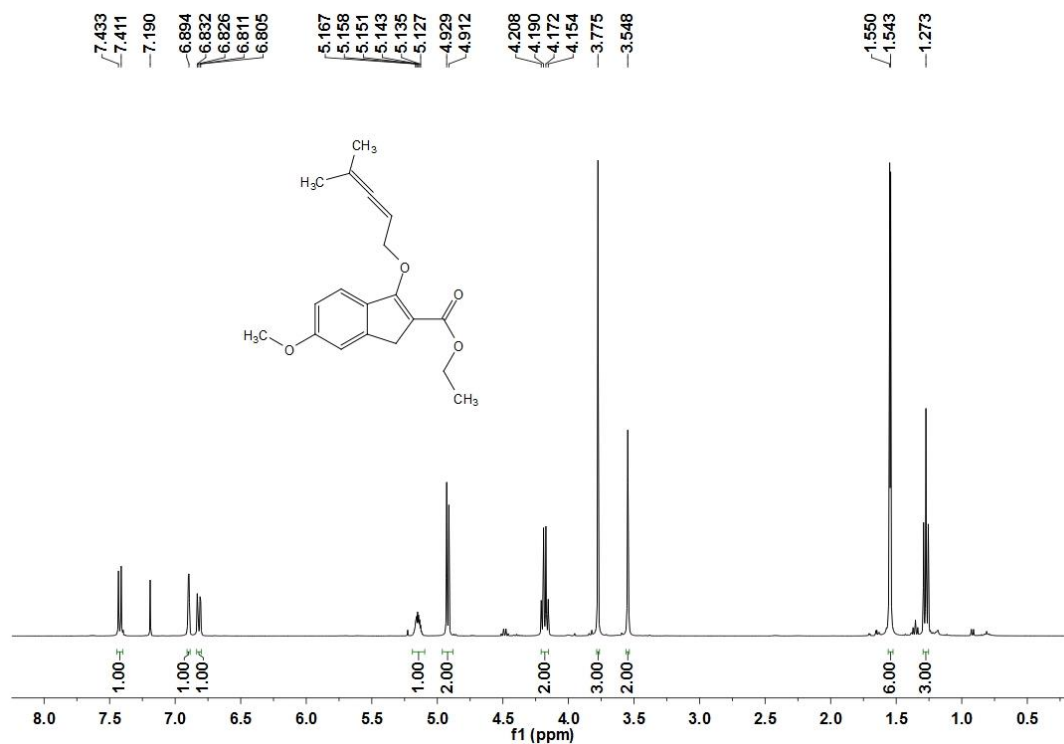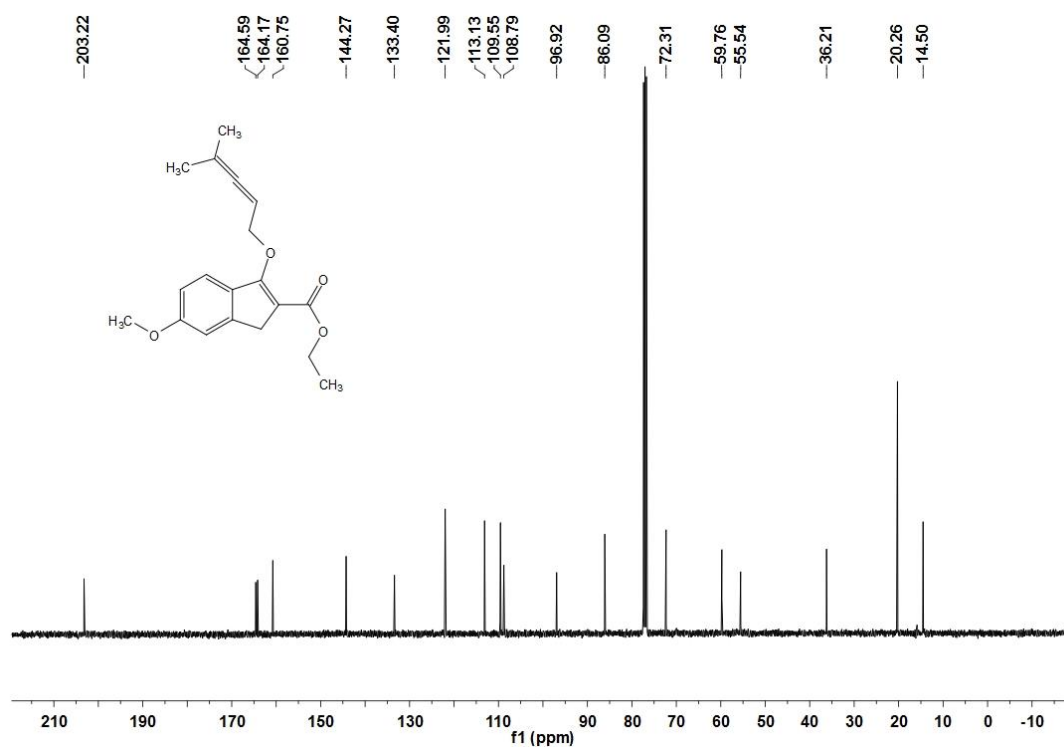

1i

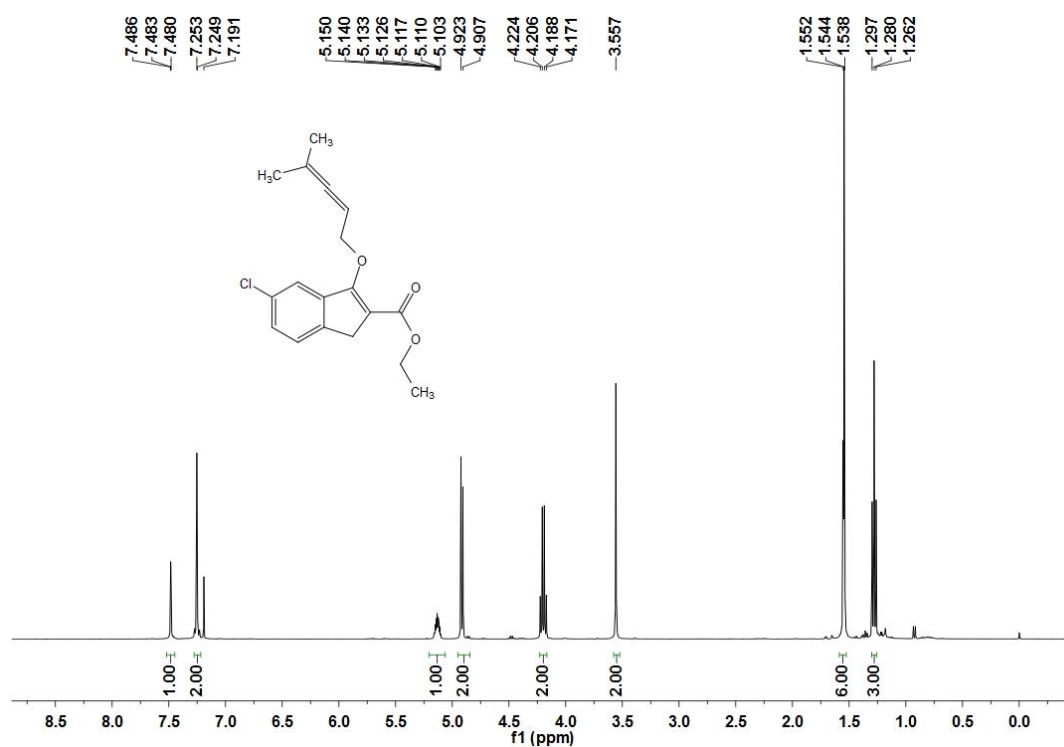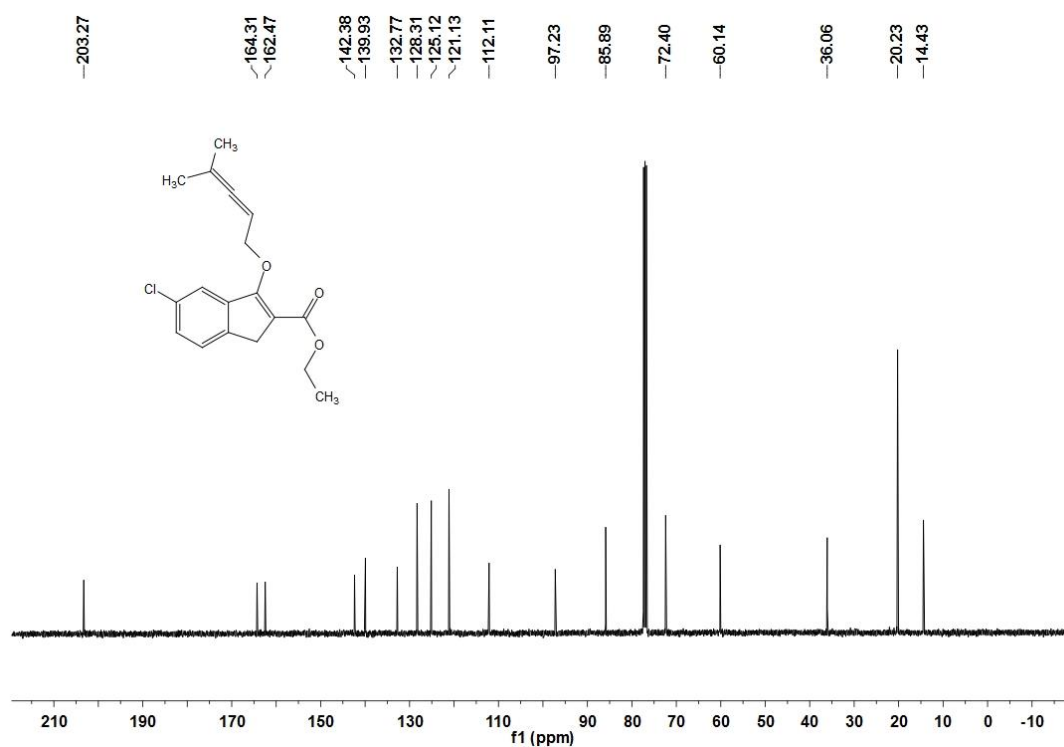

1j

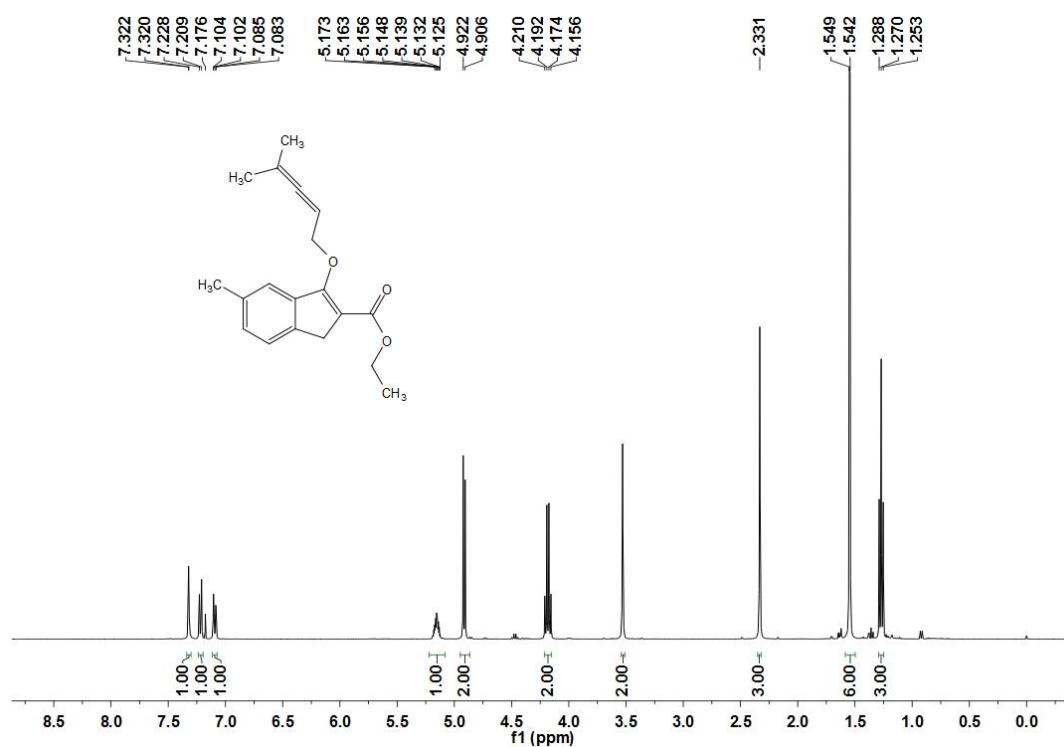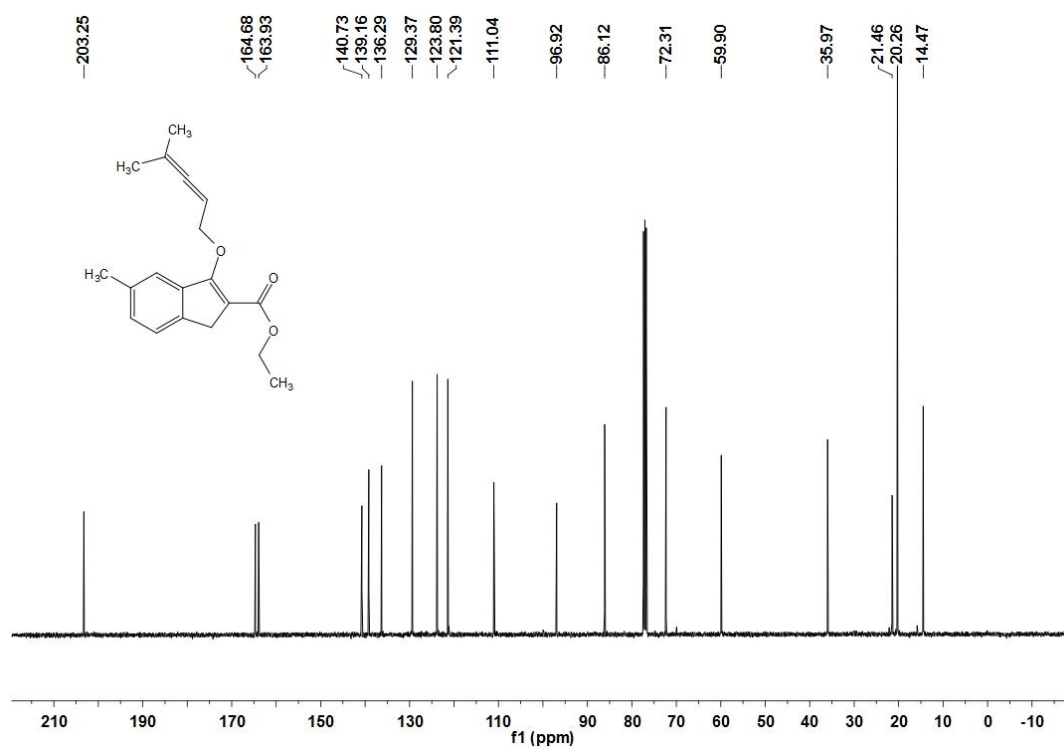

1k

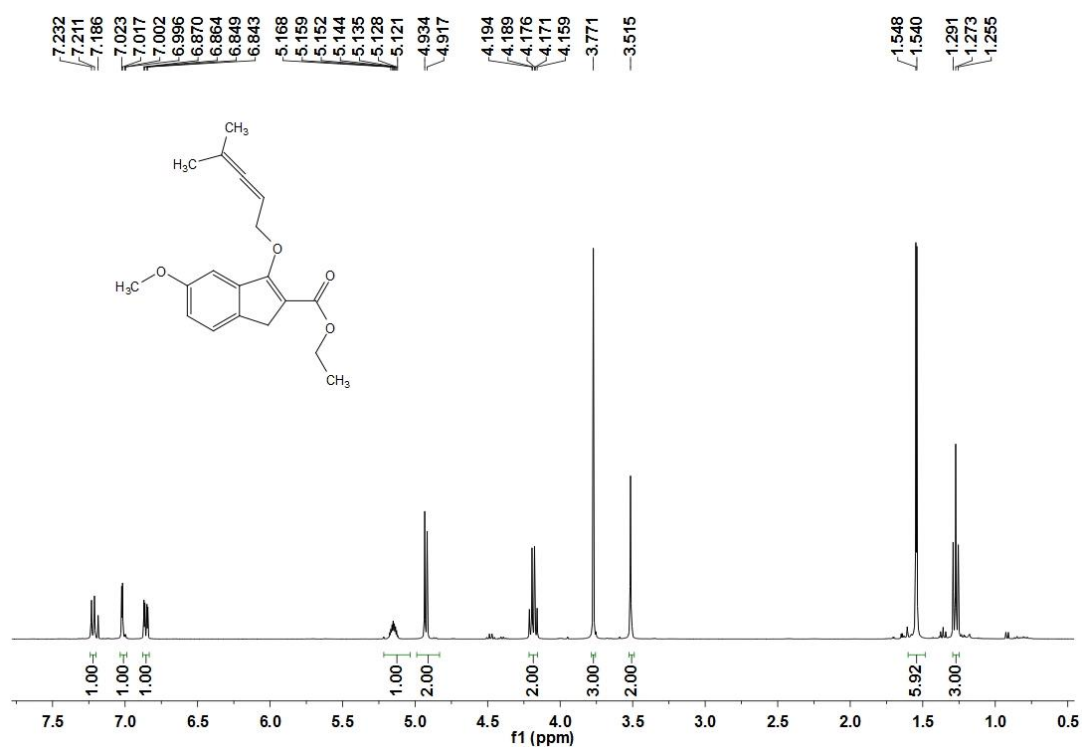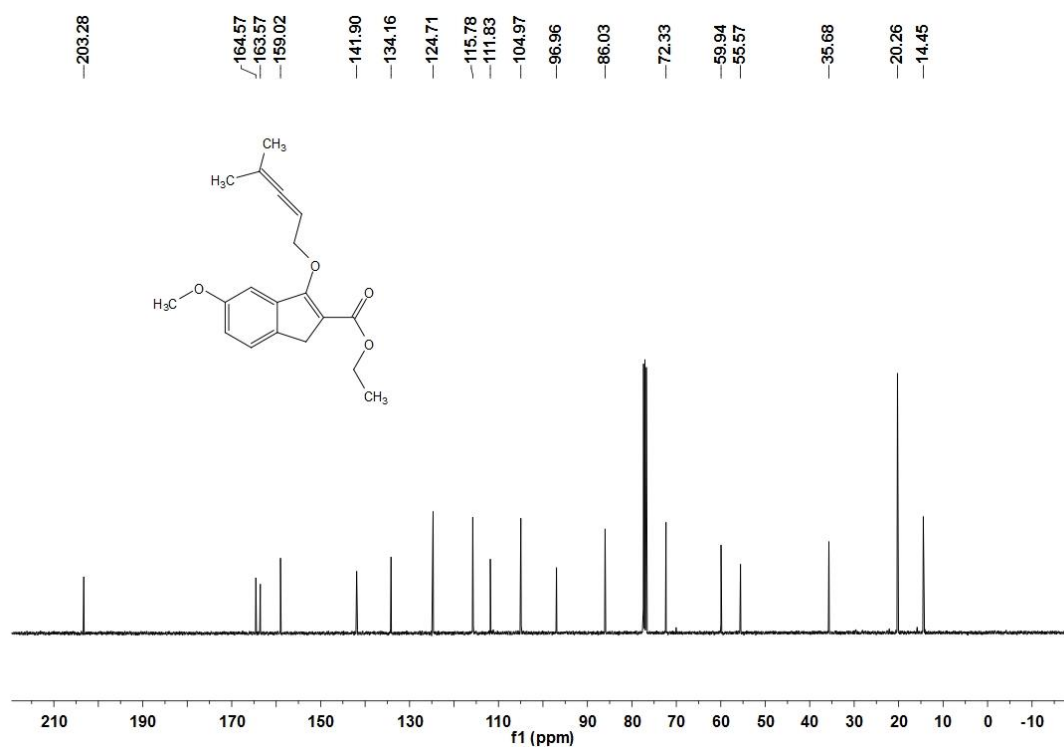

11

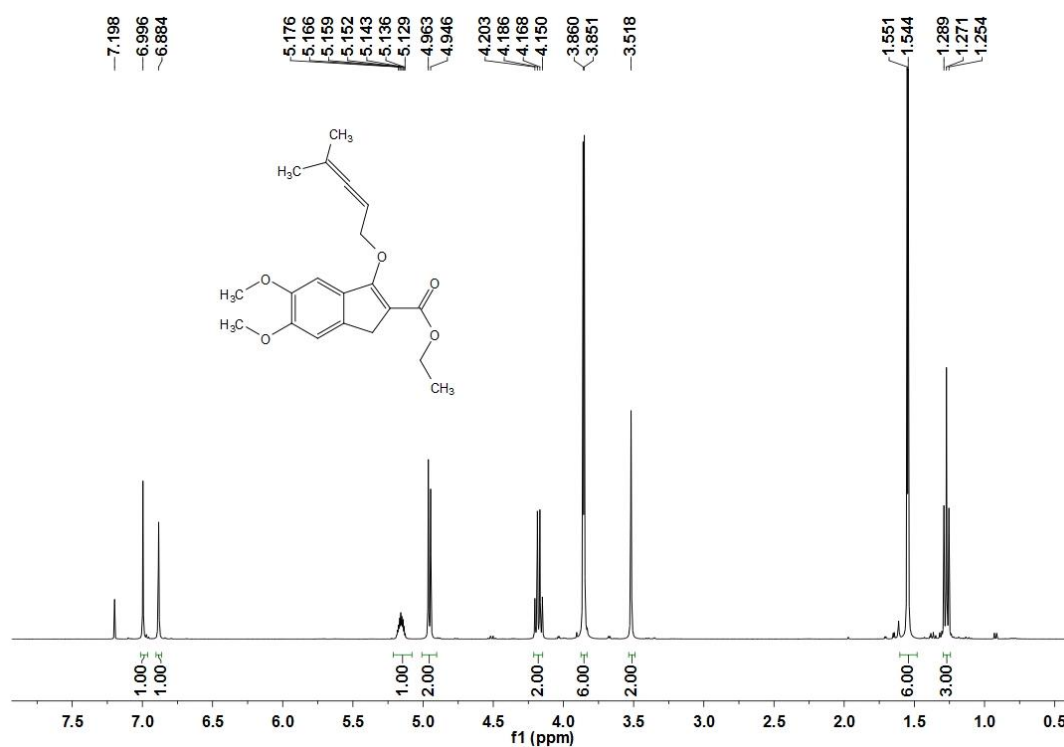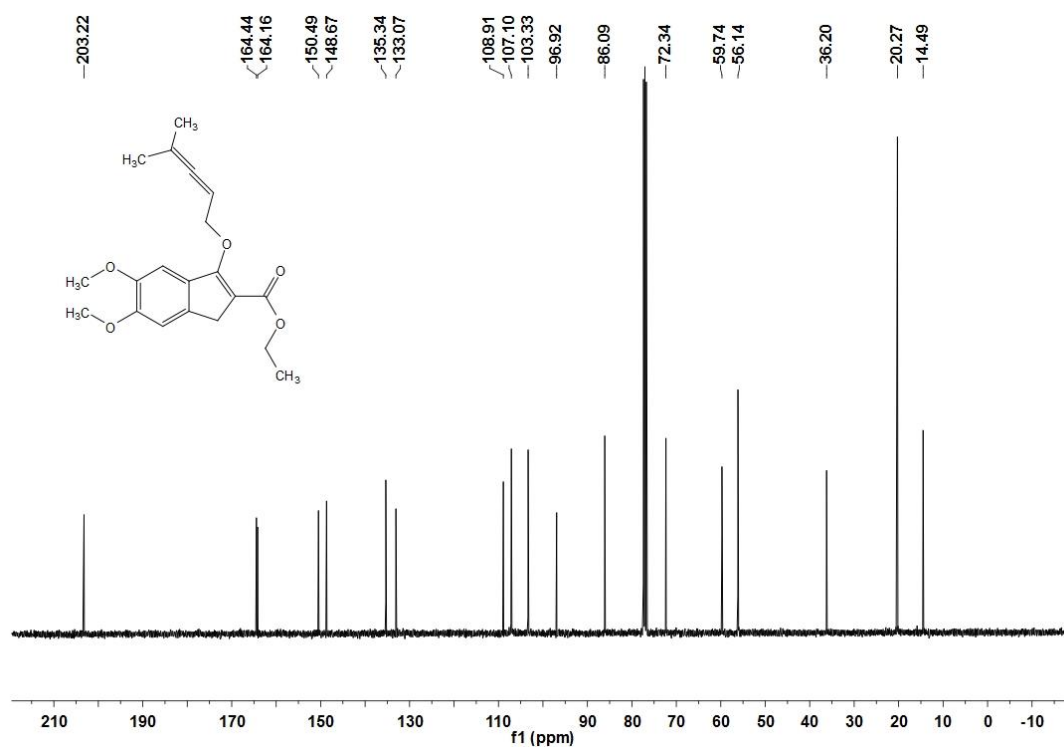



1m

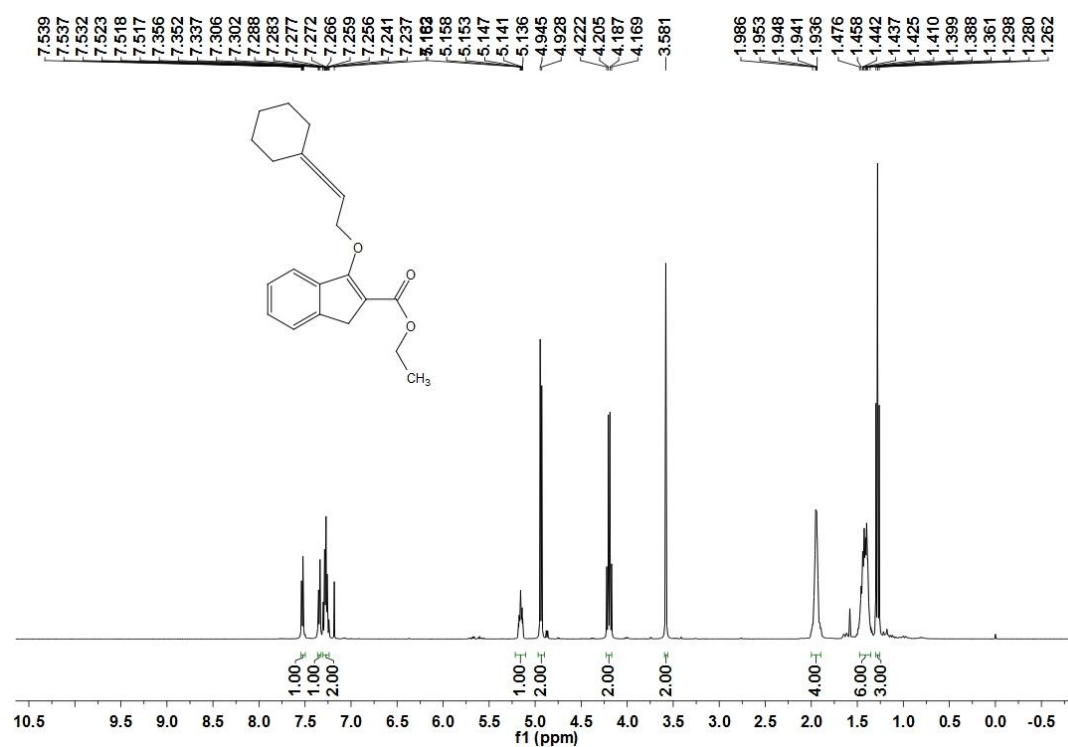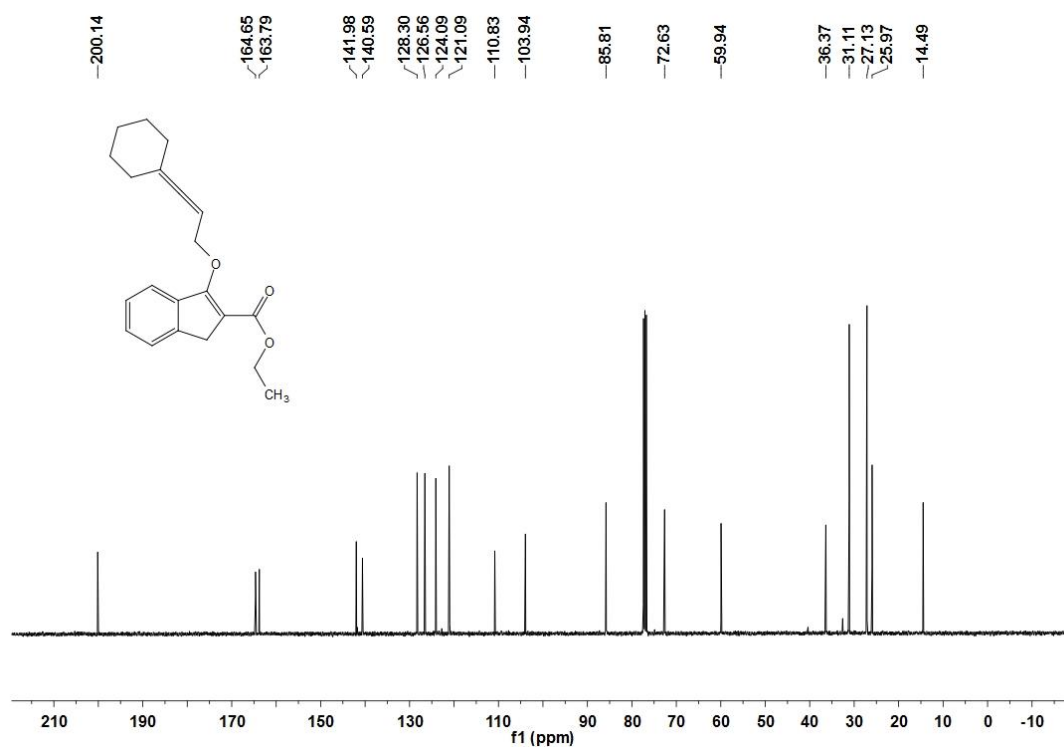

1n

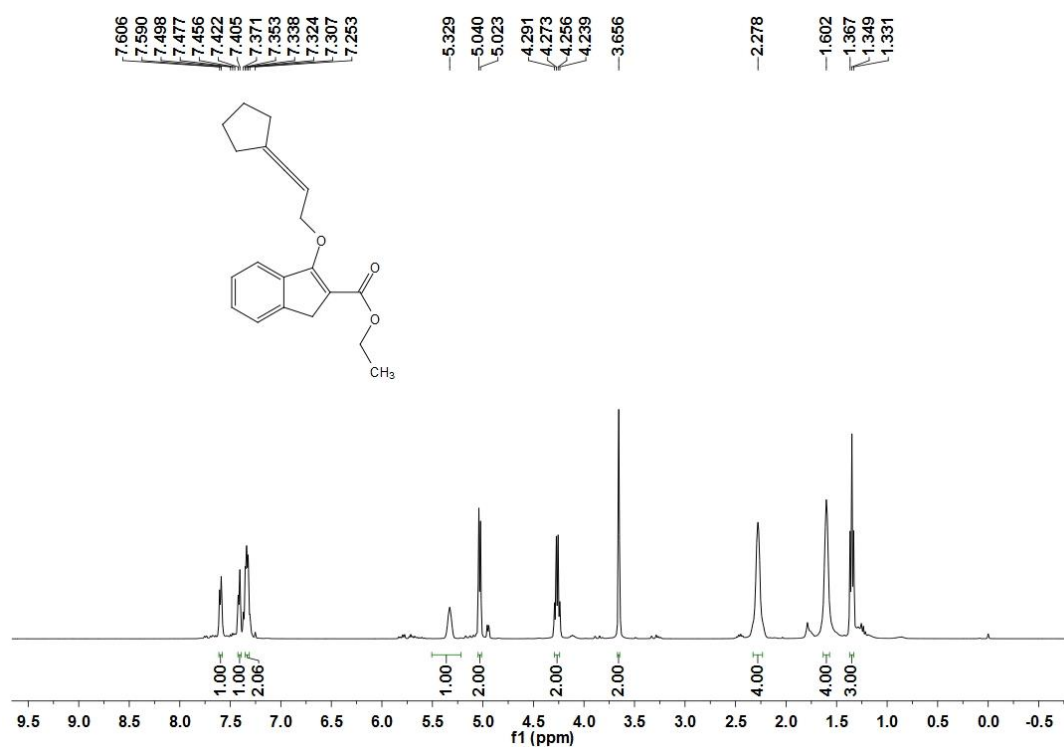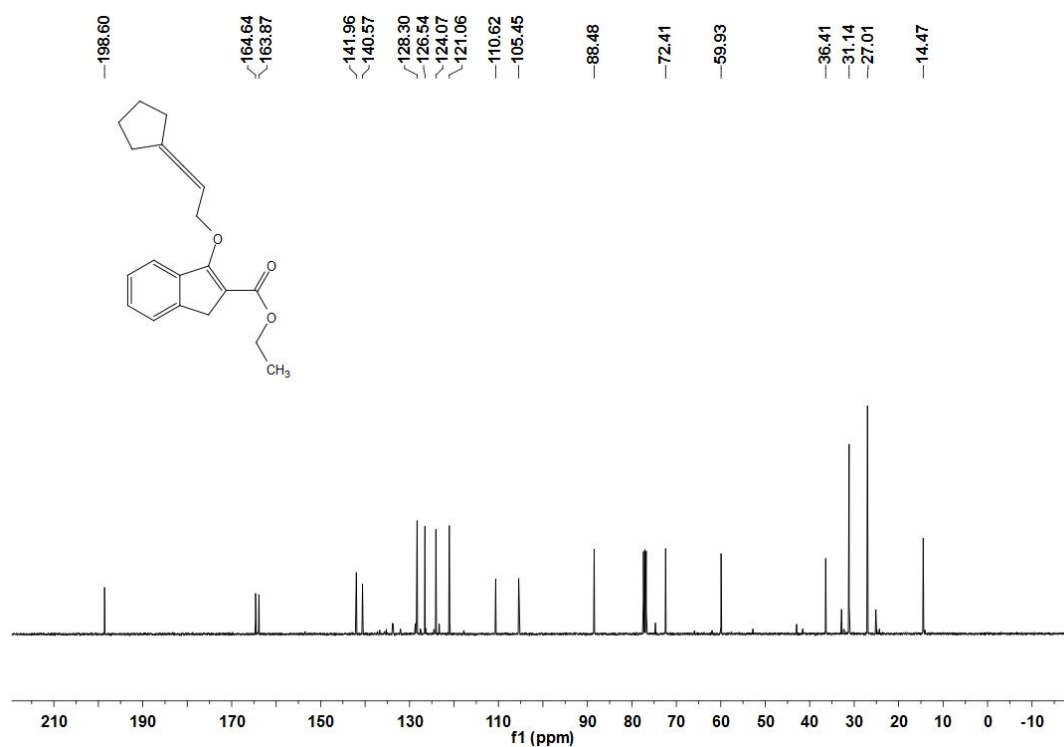

1o

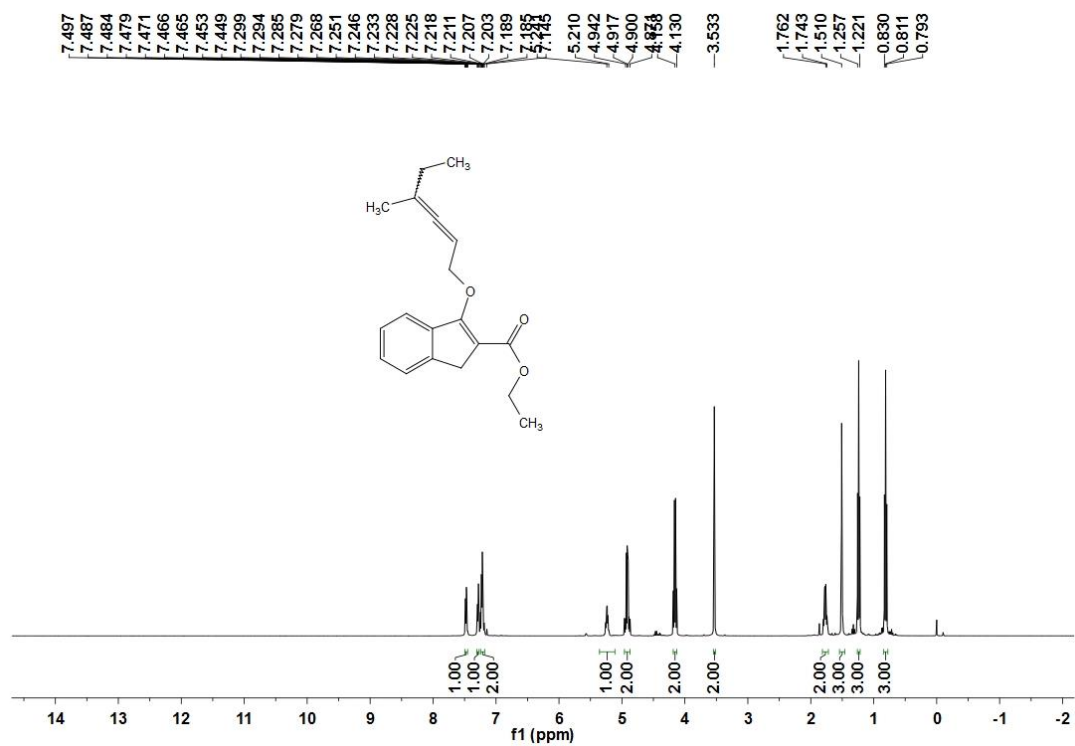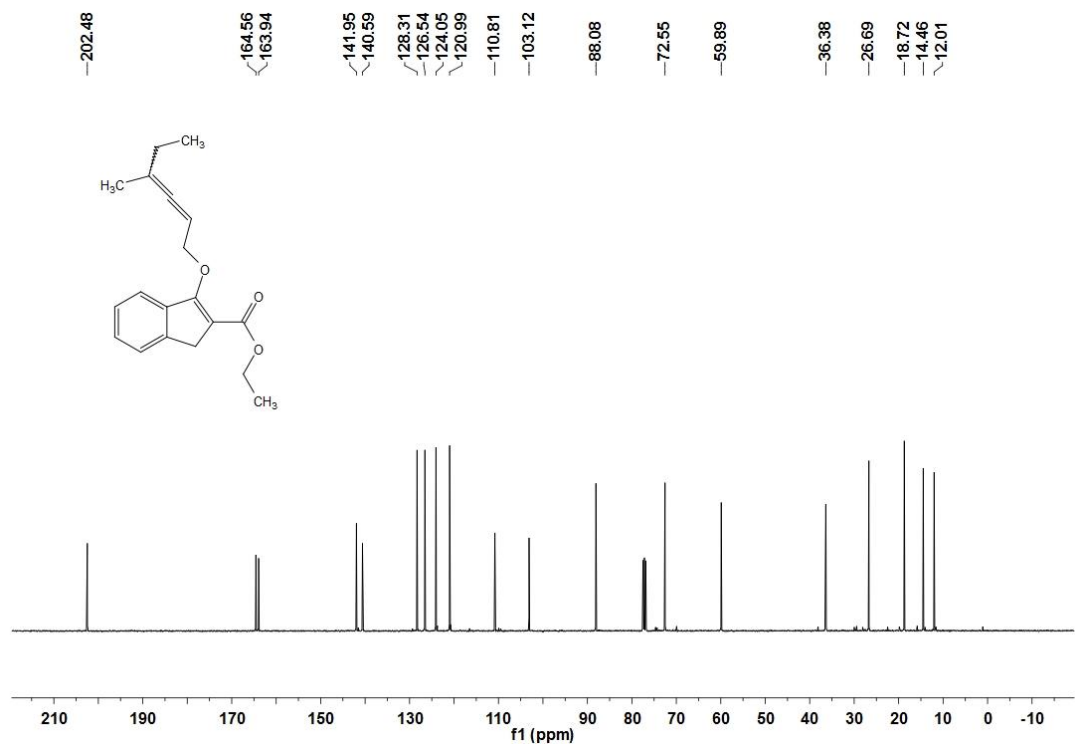

1p

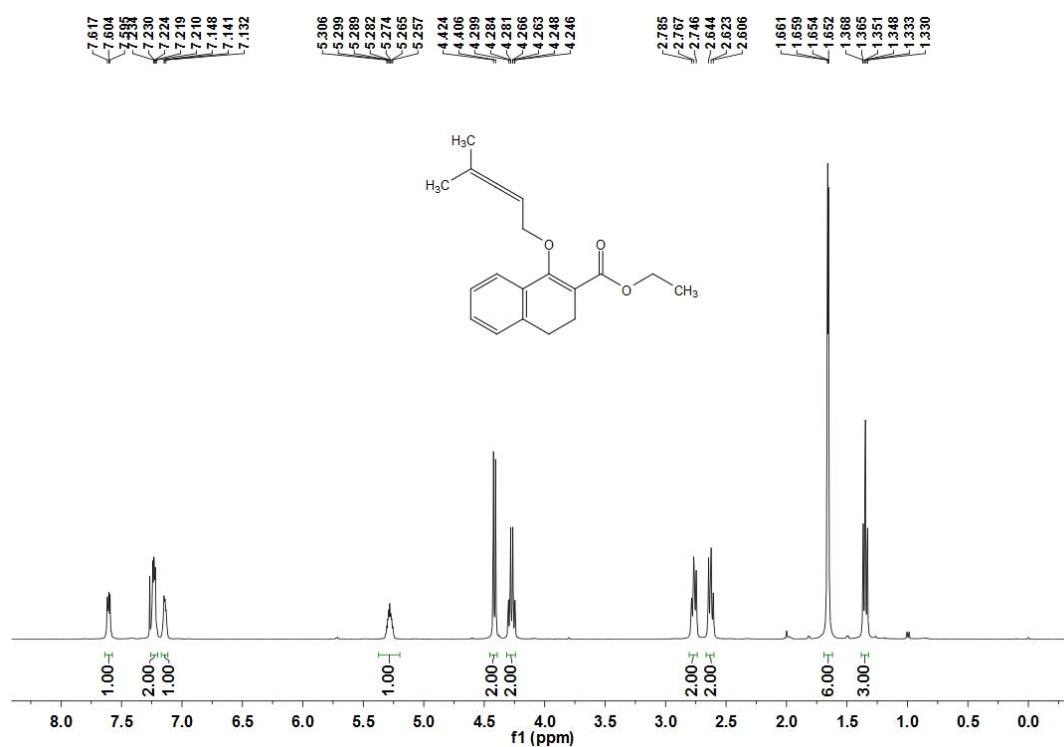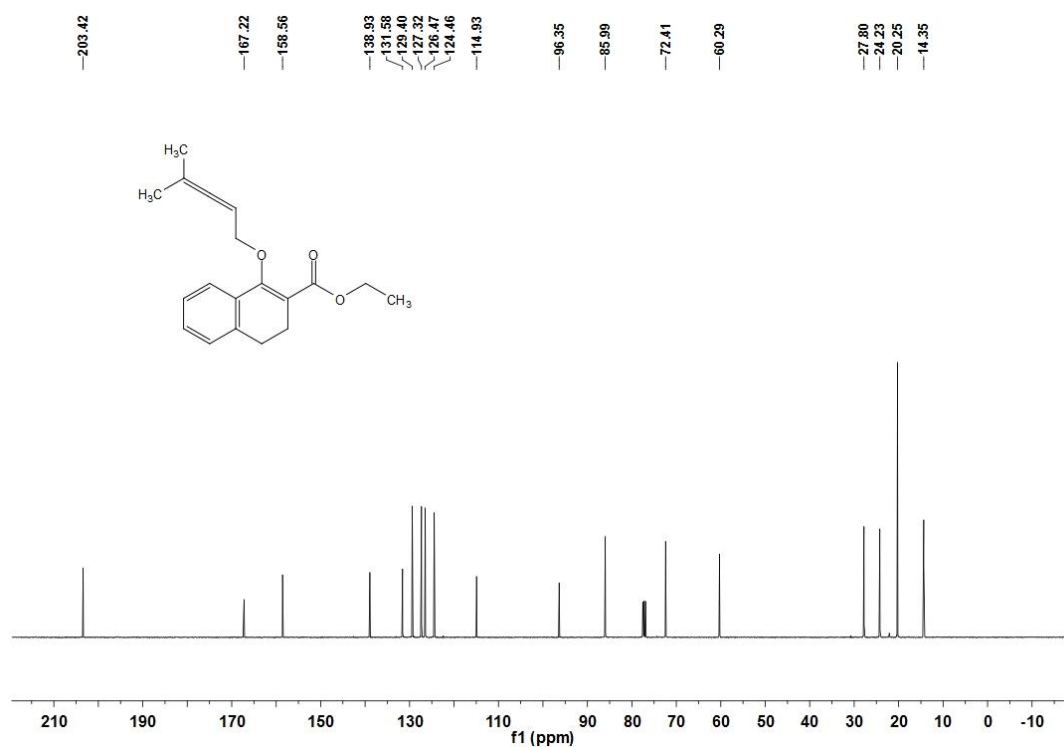

1q

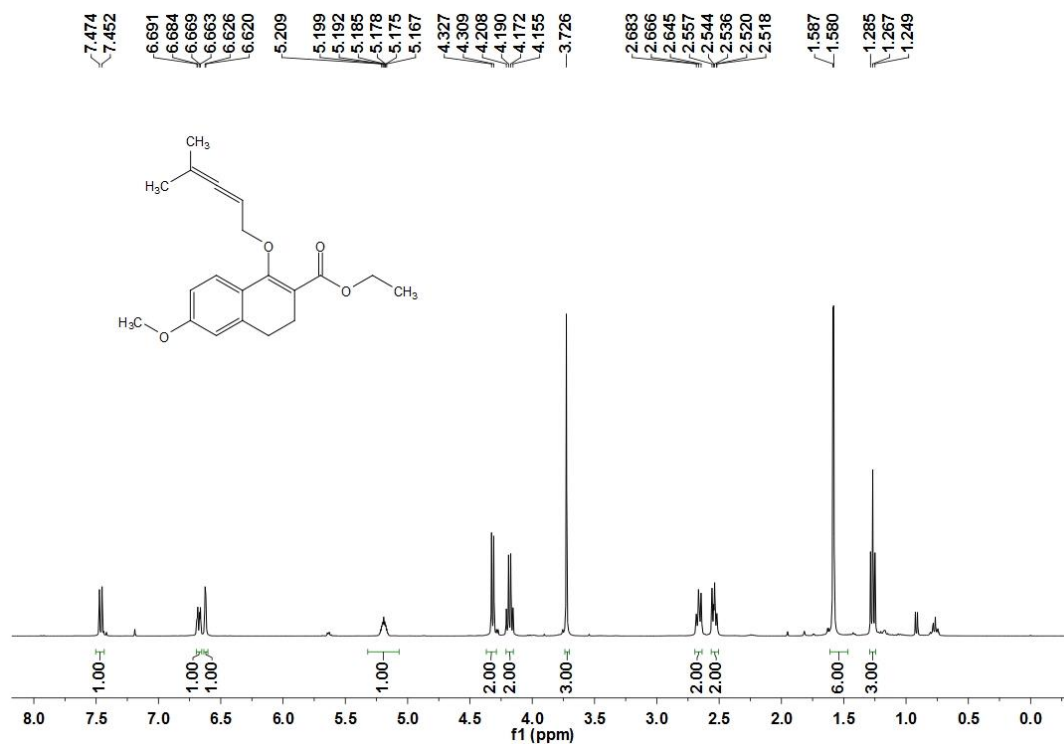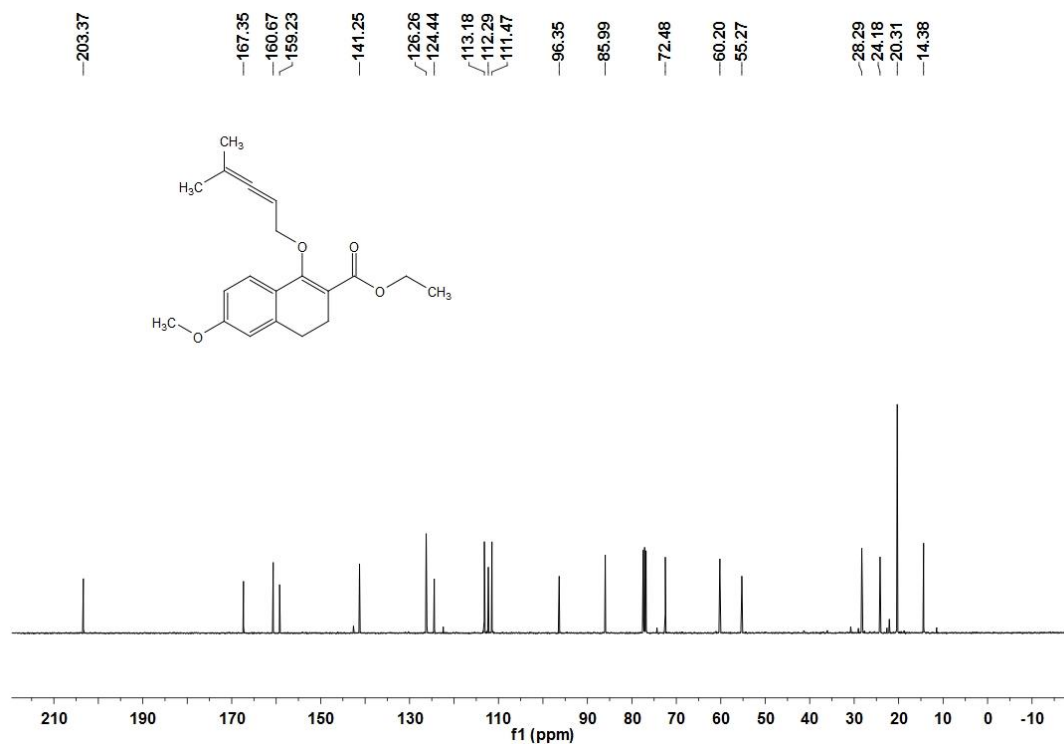

1r

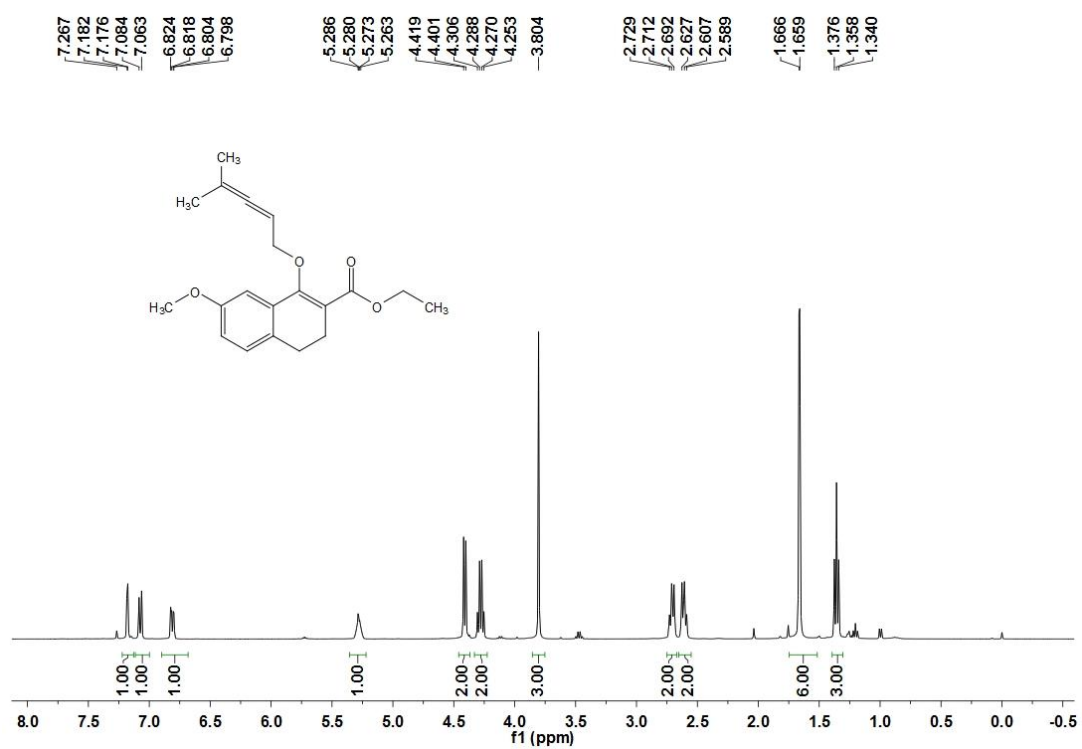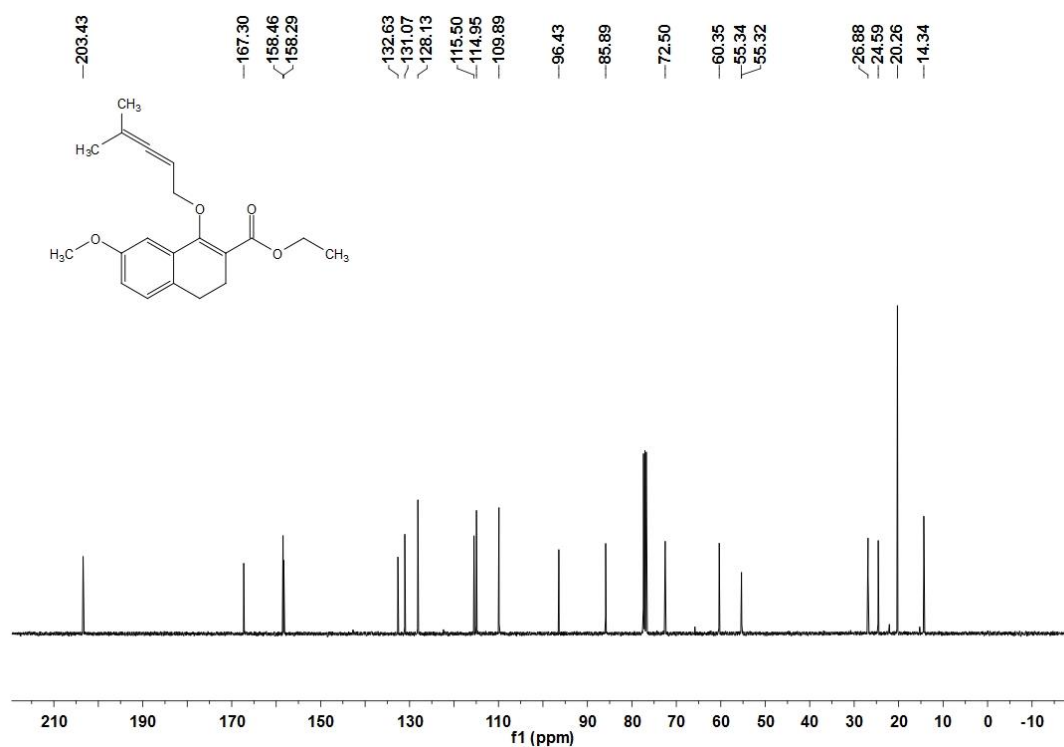

1s

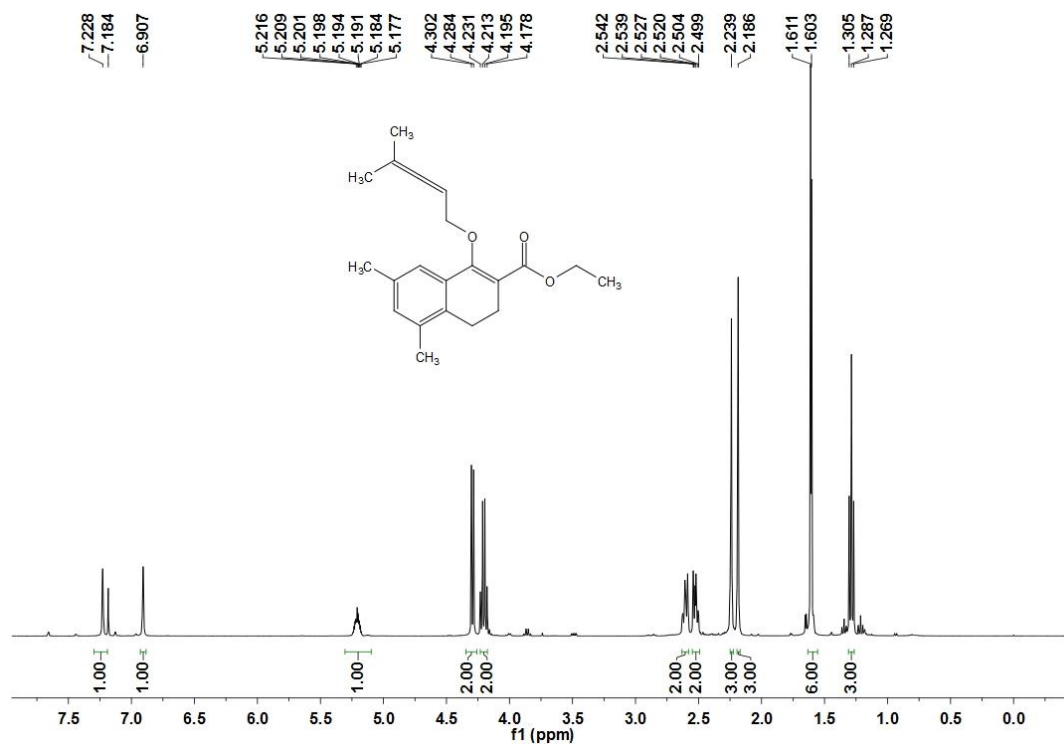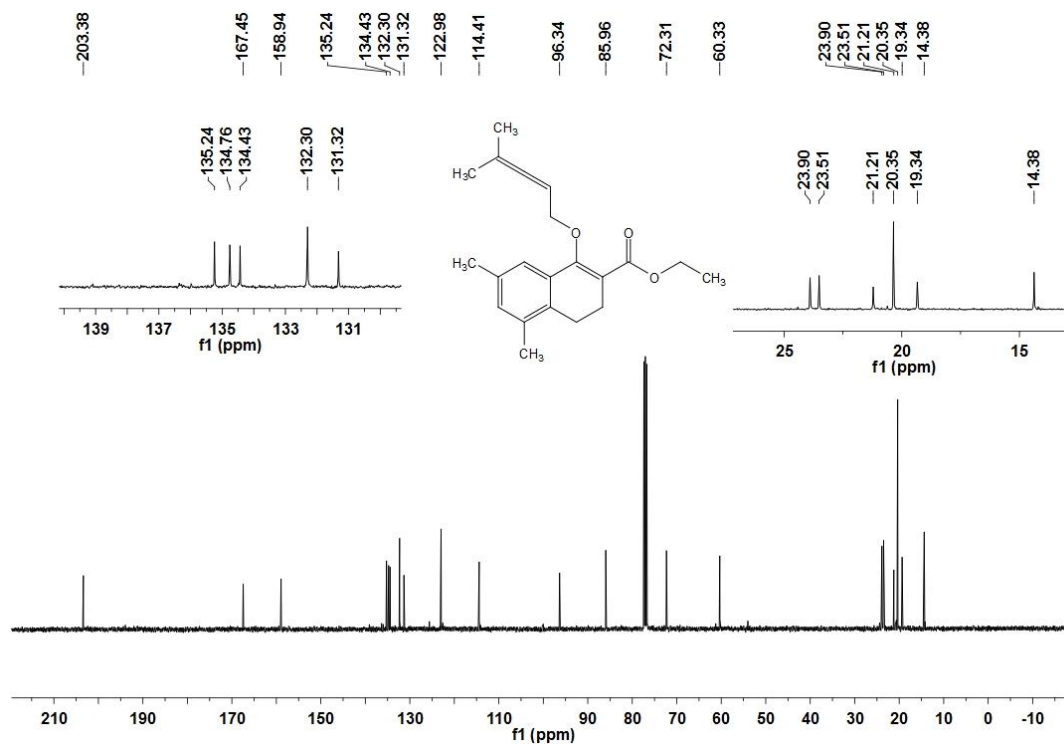

1u

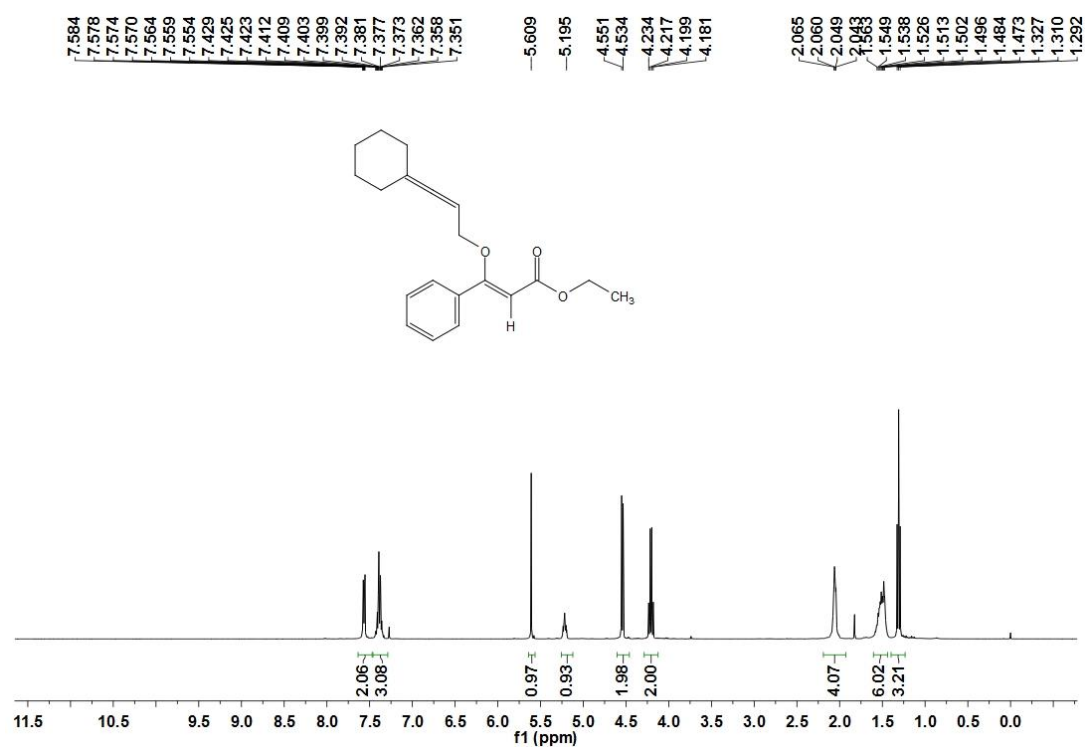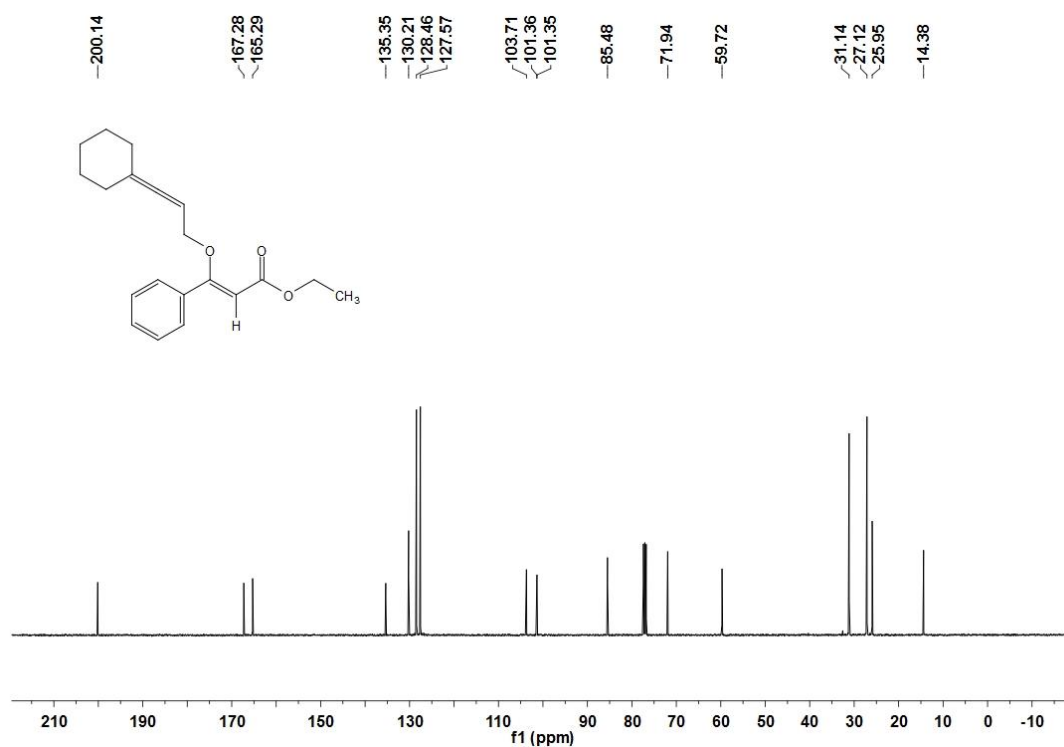



2a

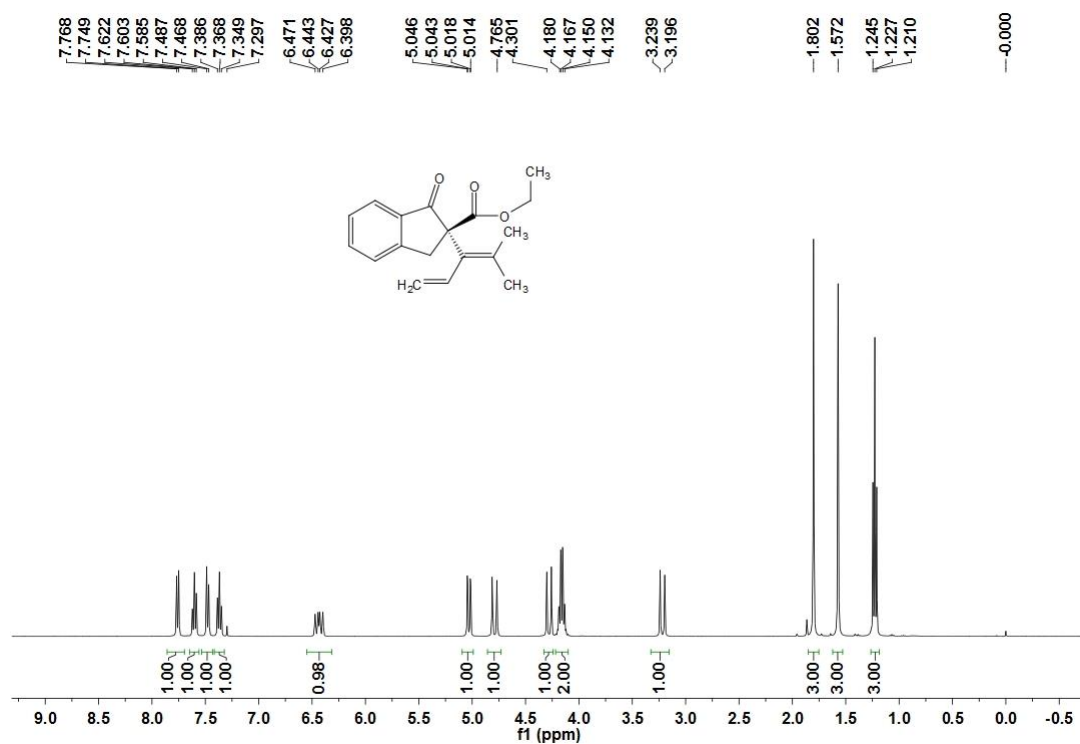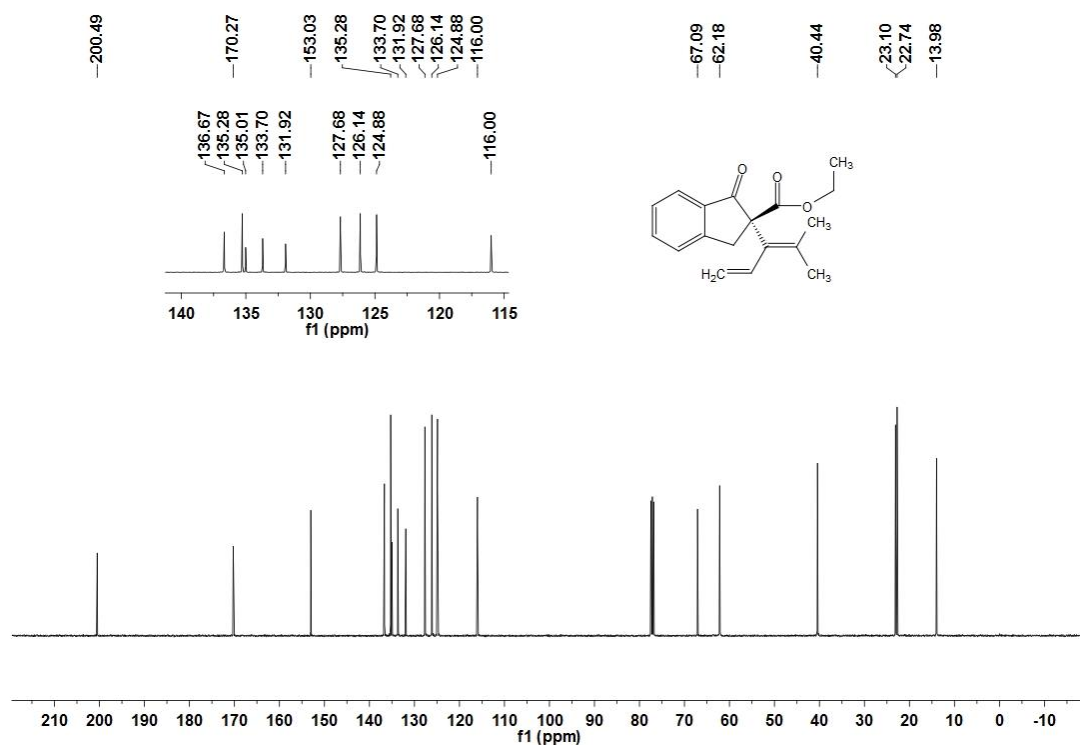

2b

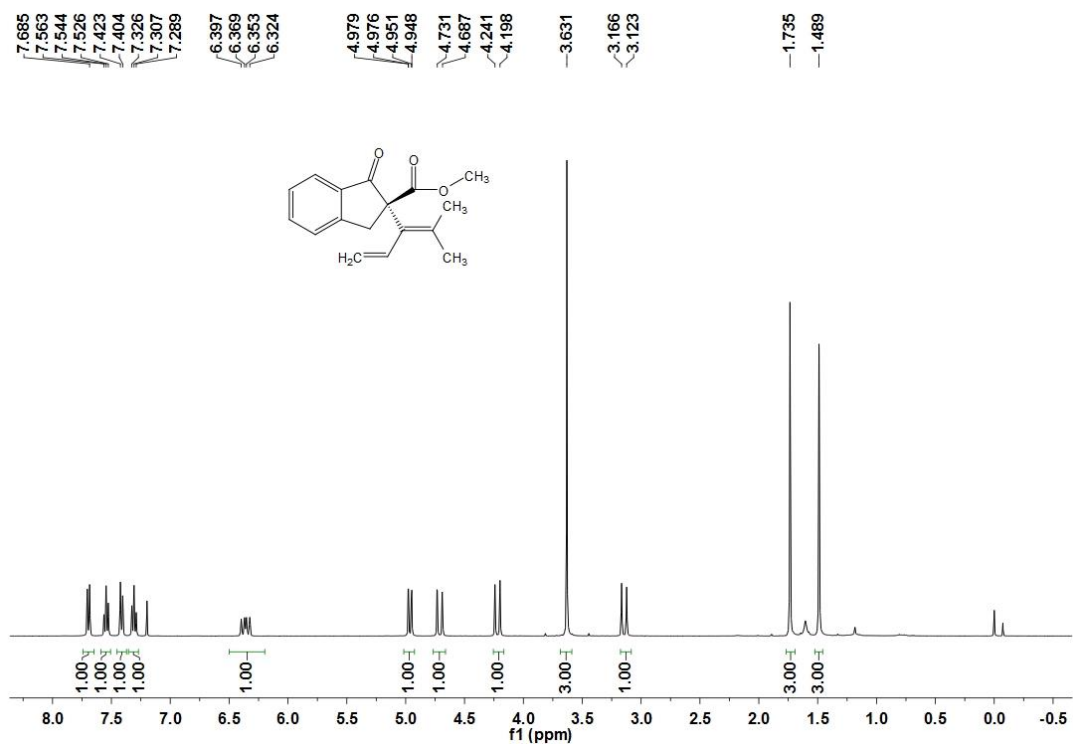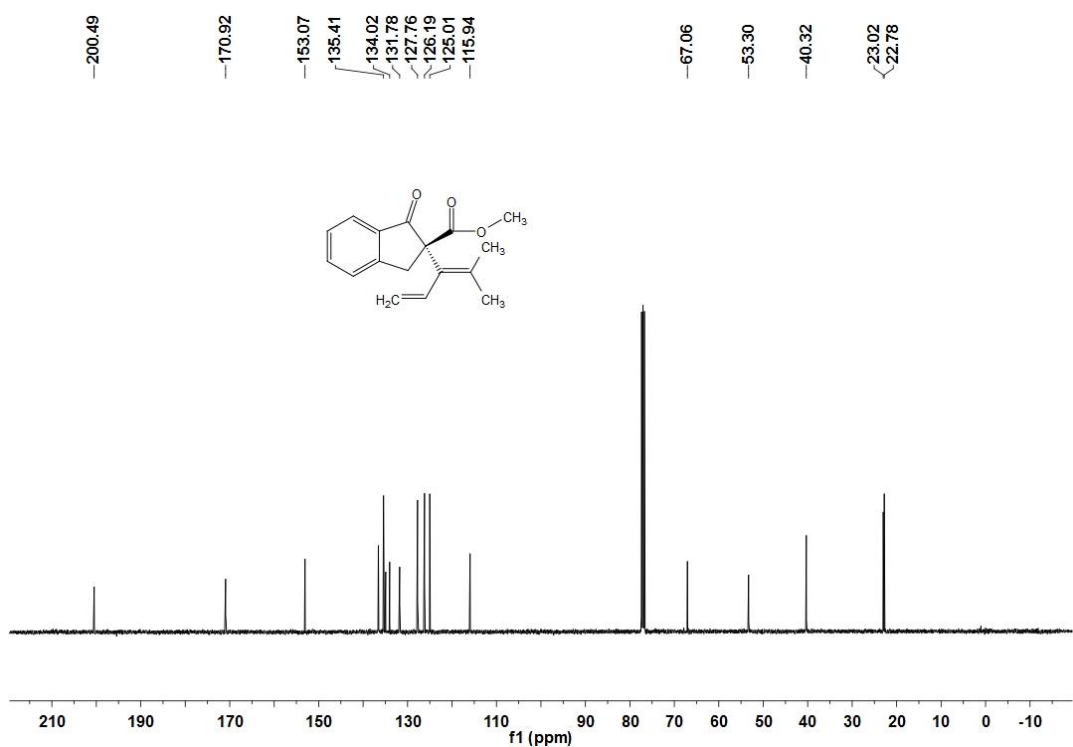

2c

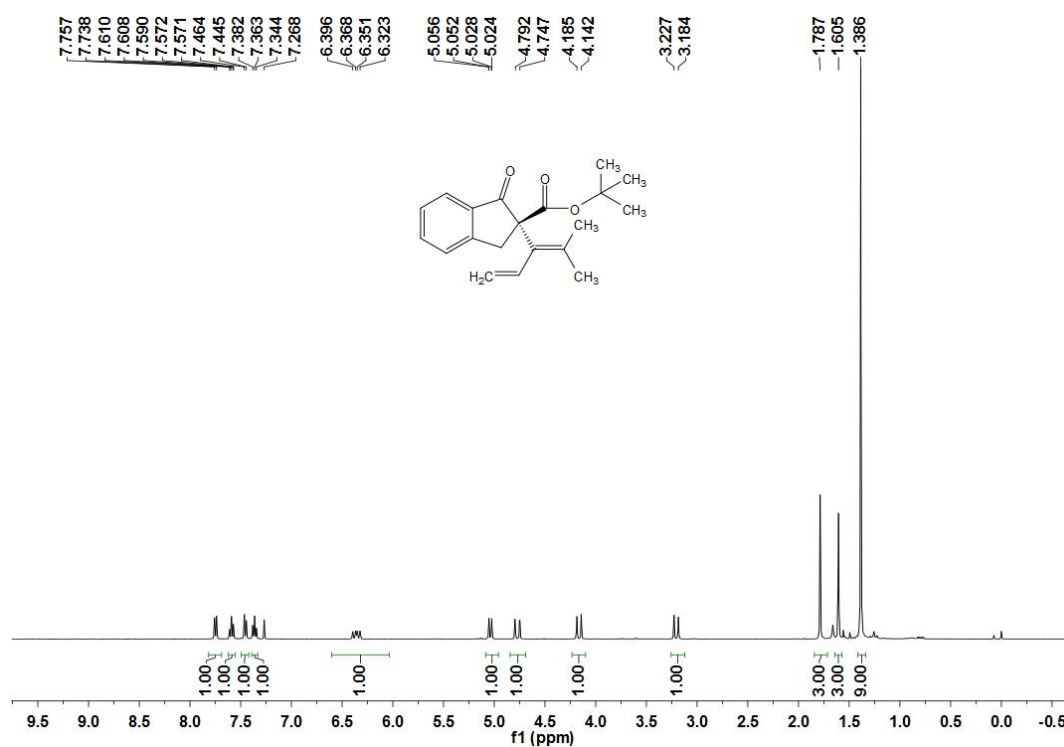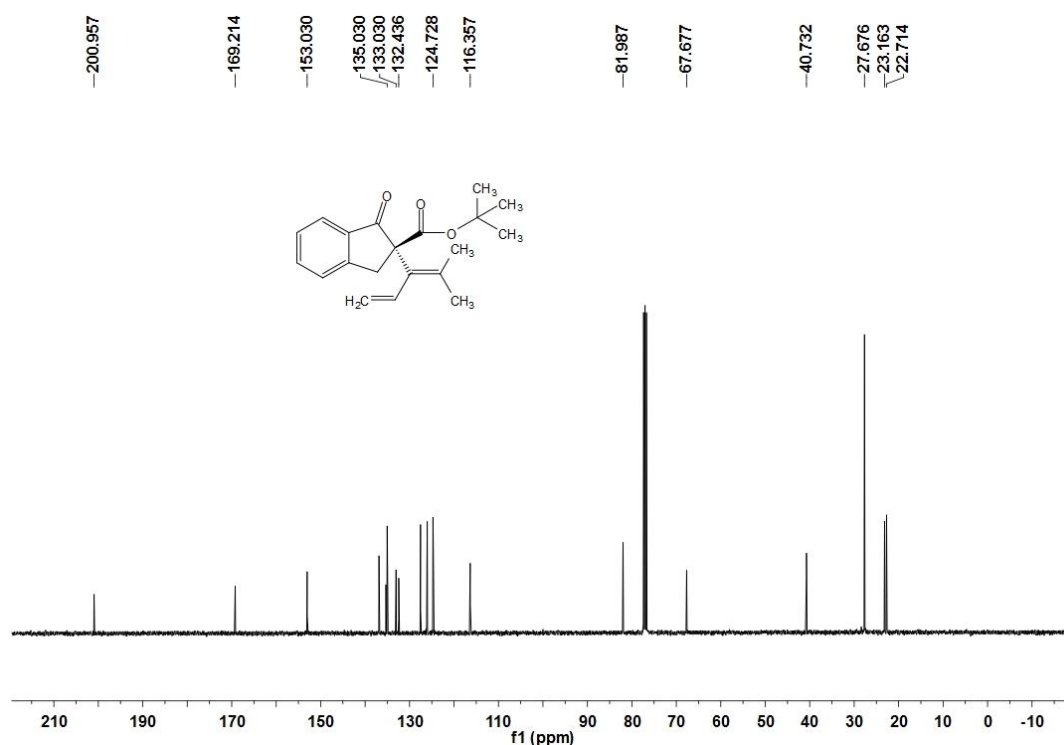

2d

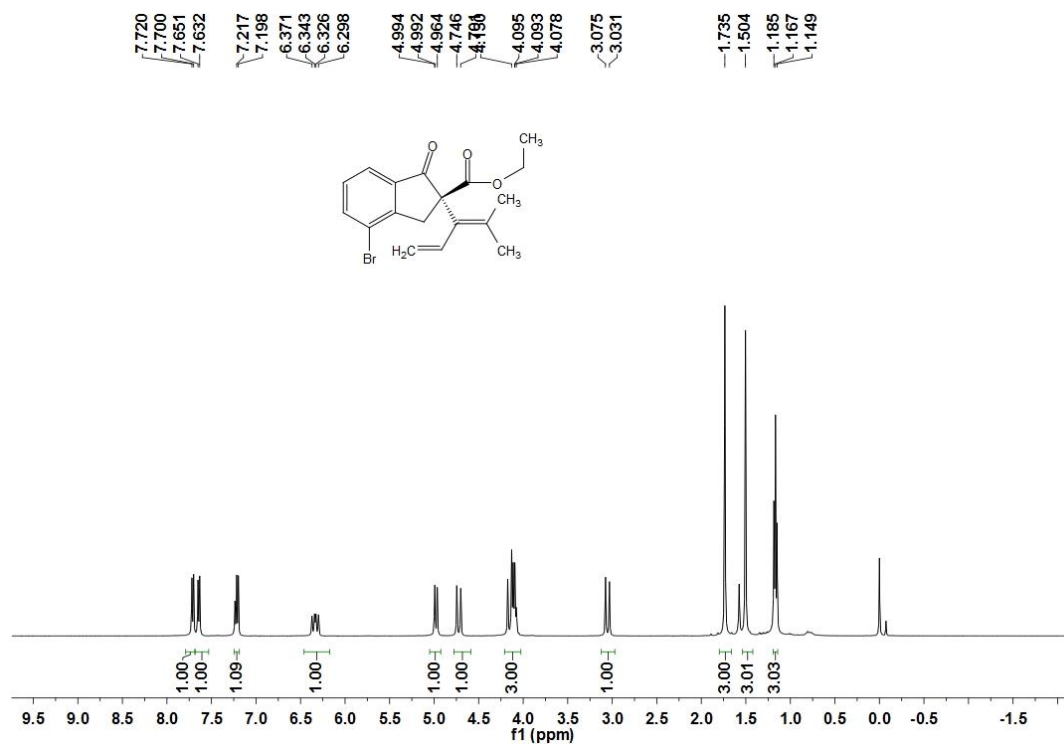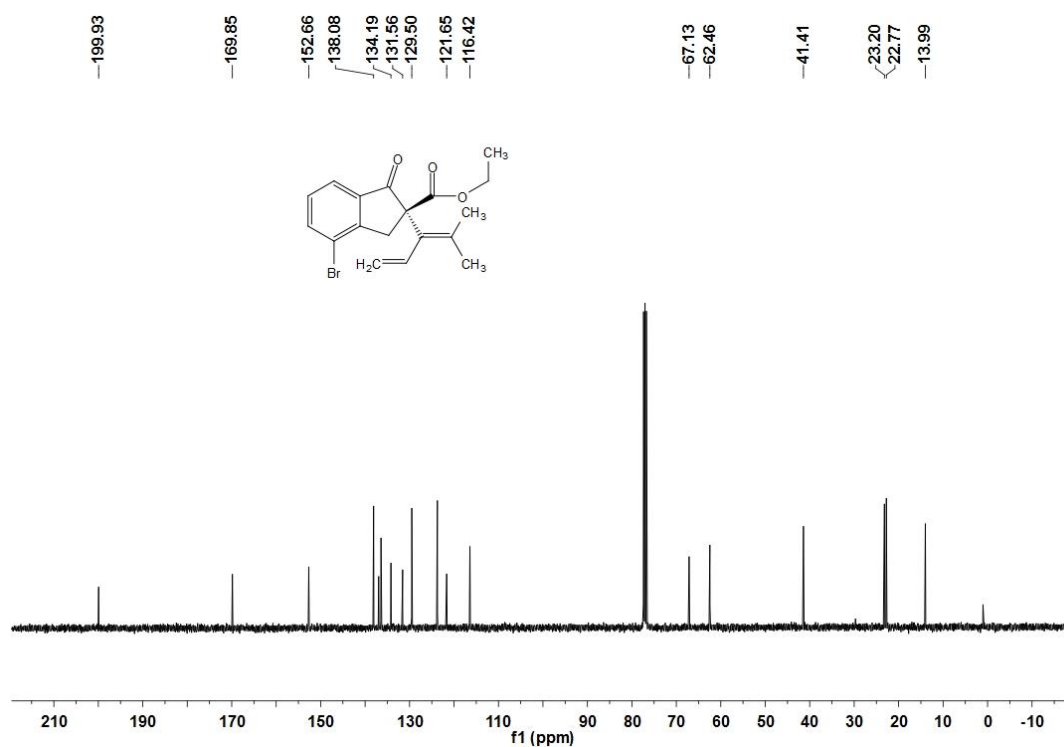

2e

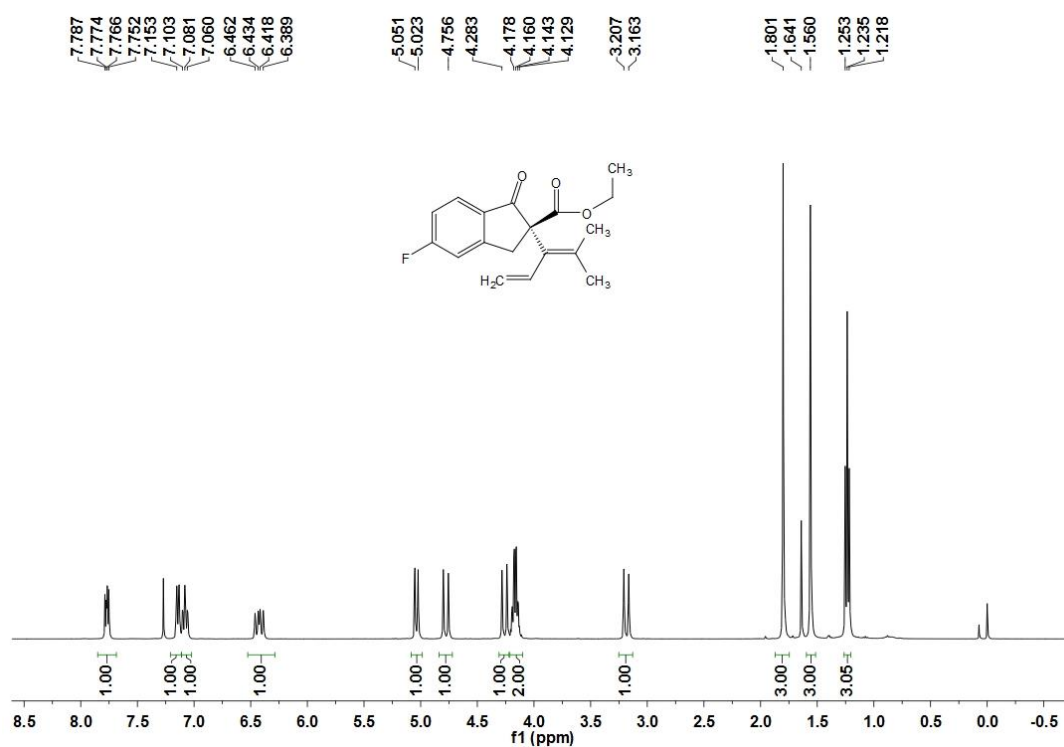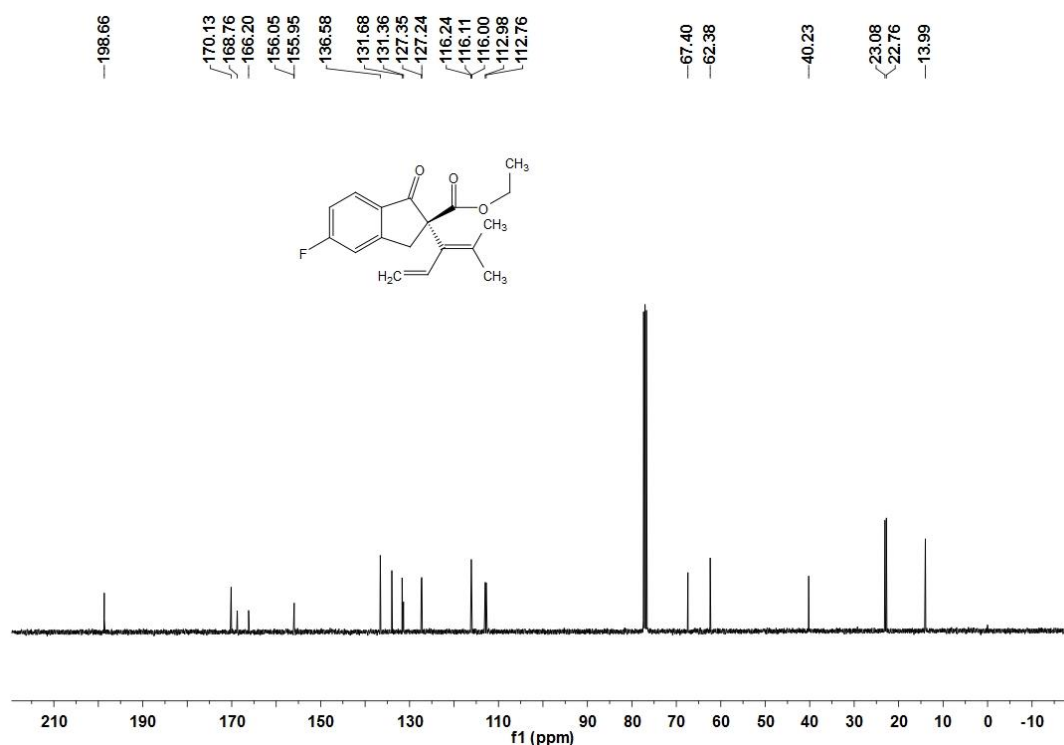

2f

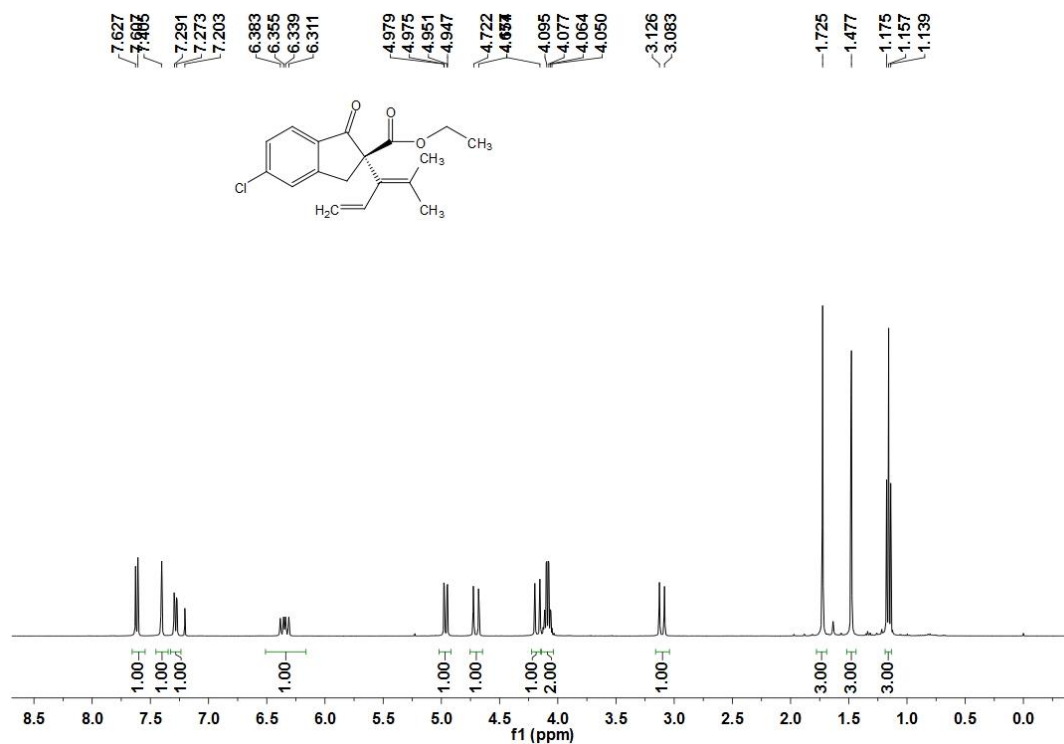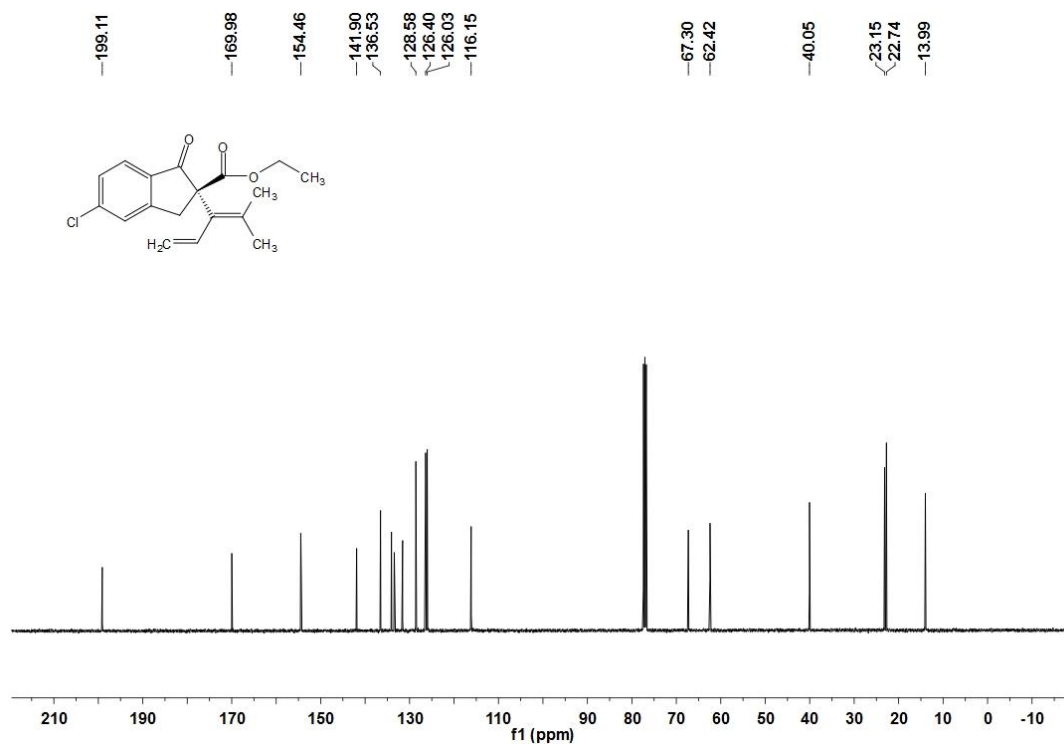

2g

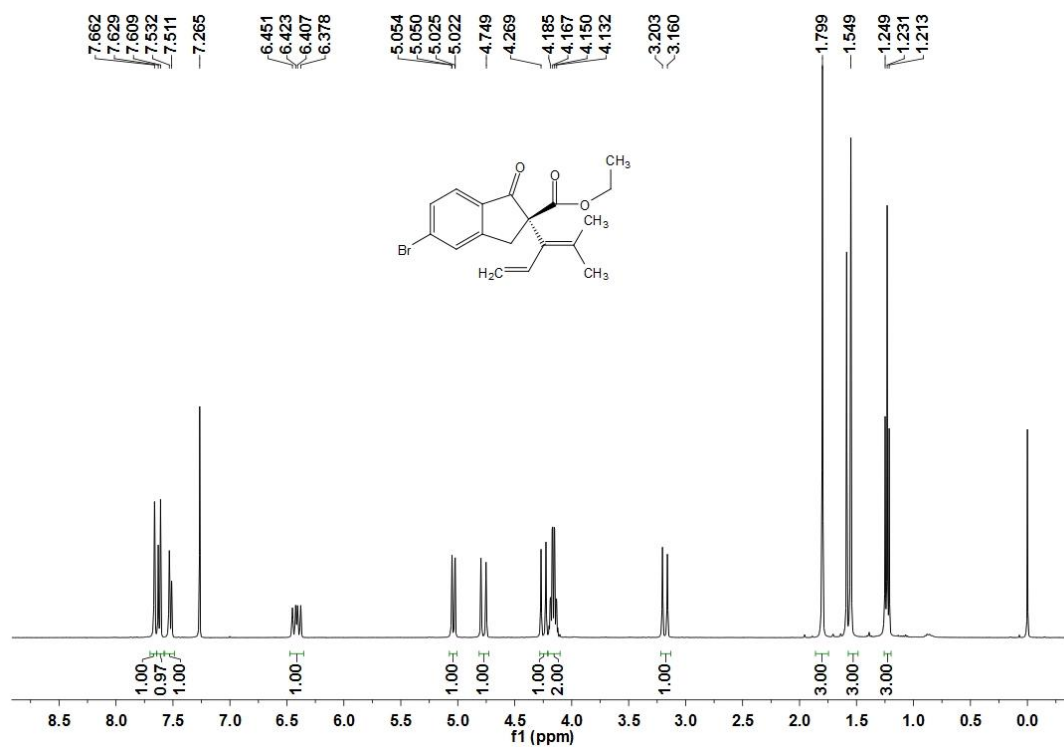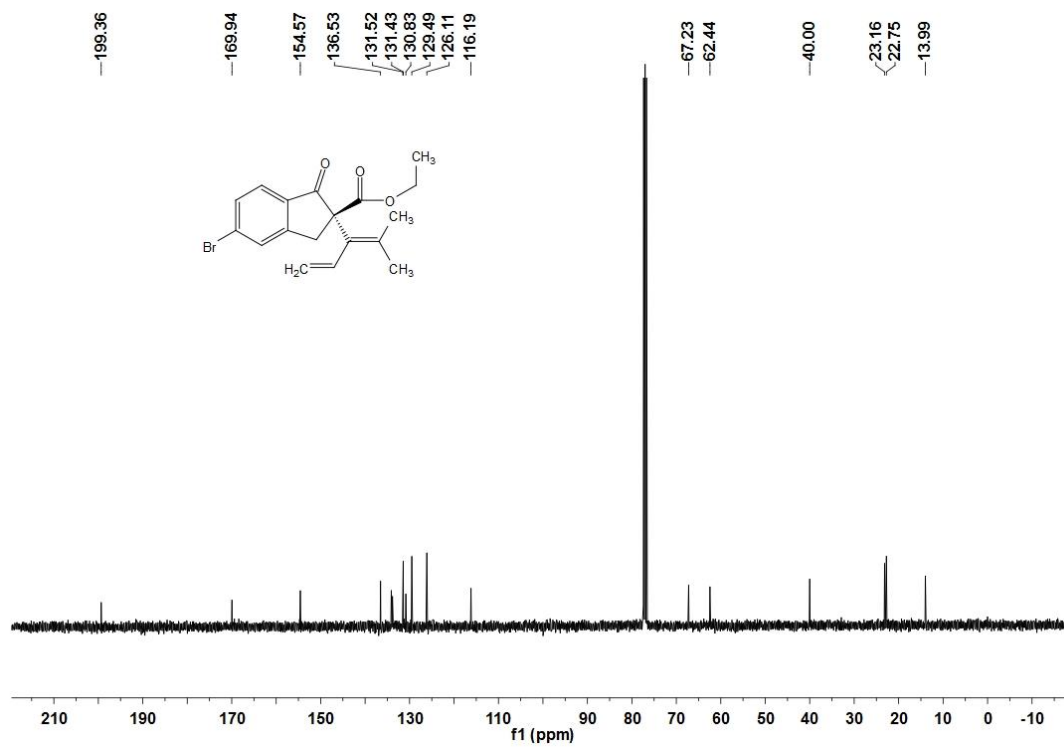

2h

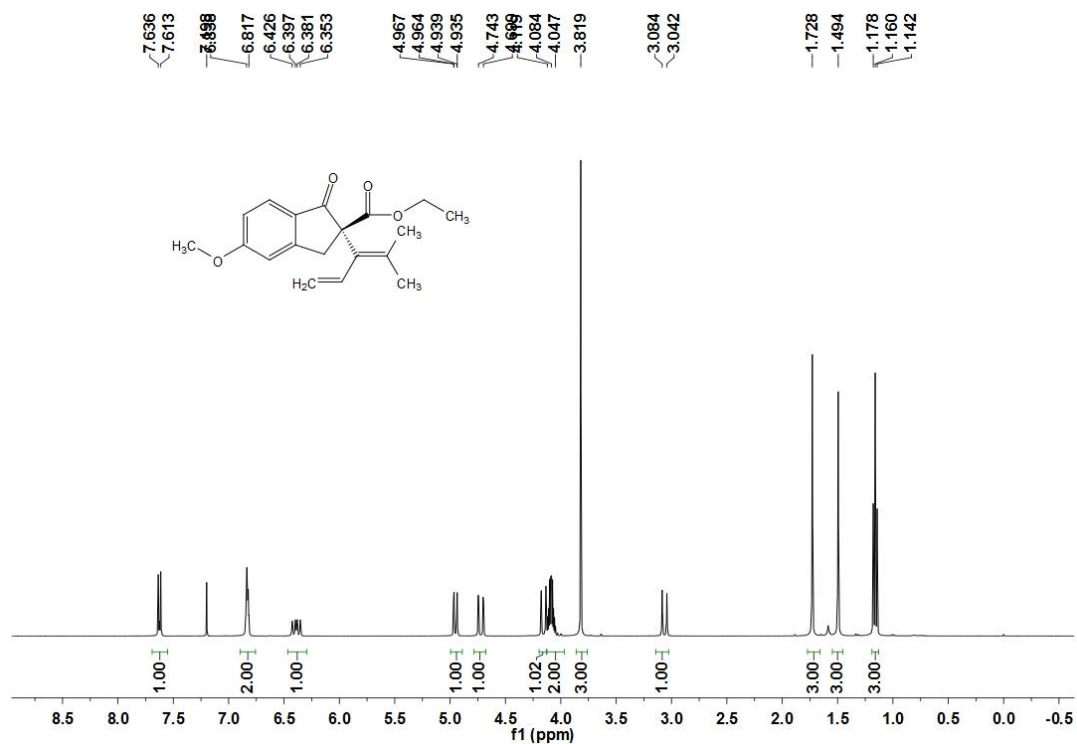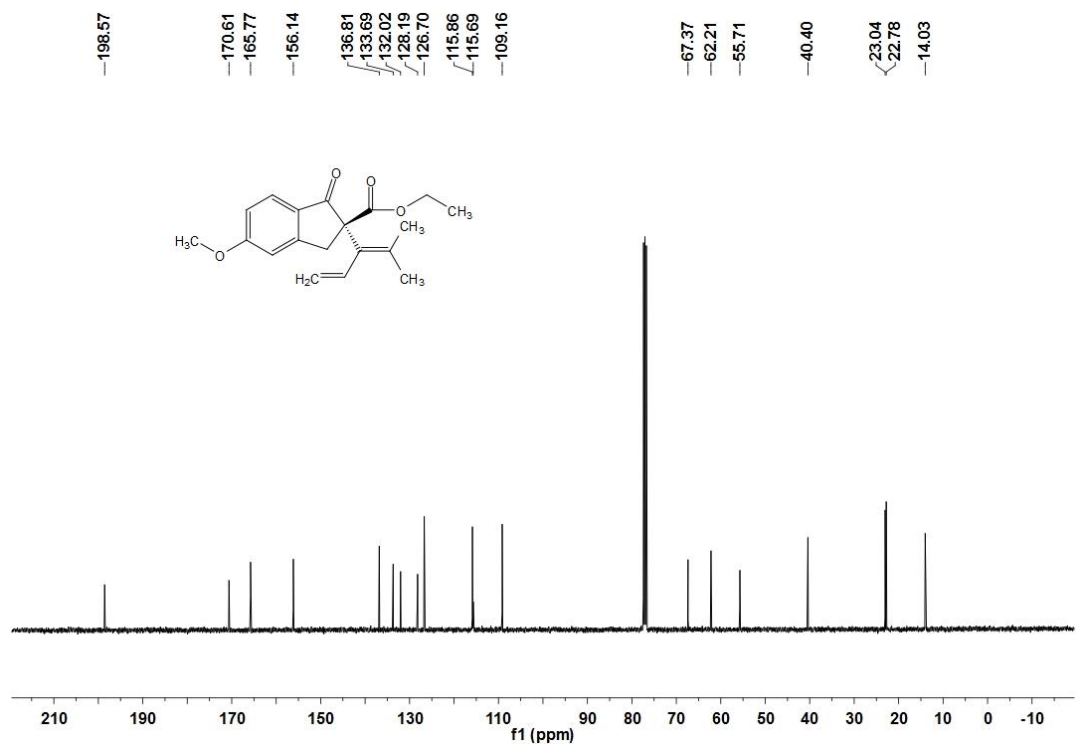





2j

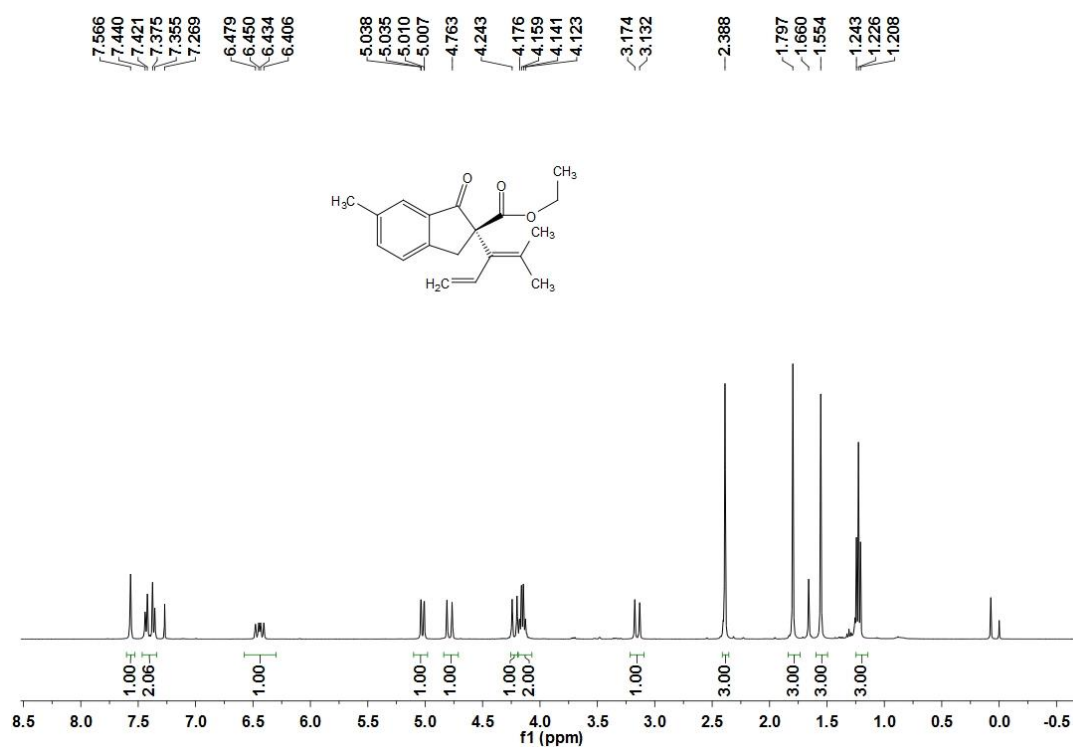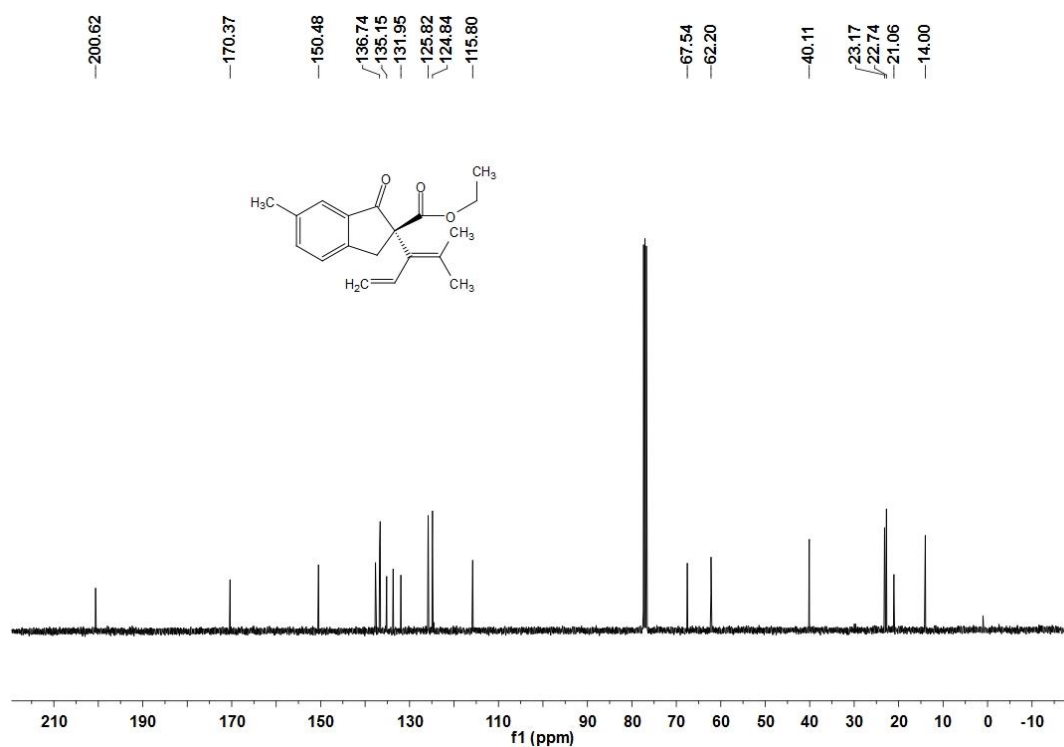

2k

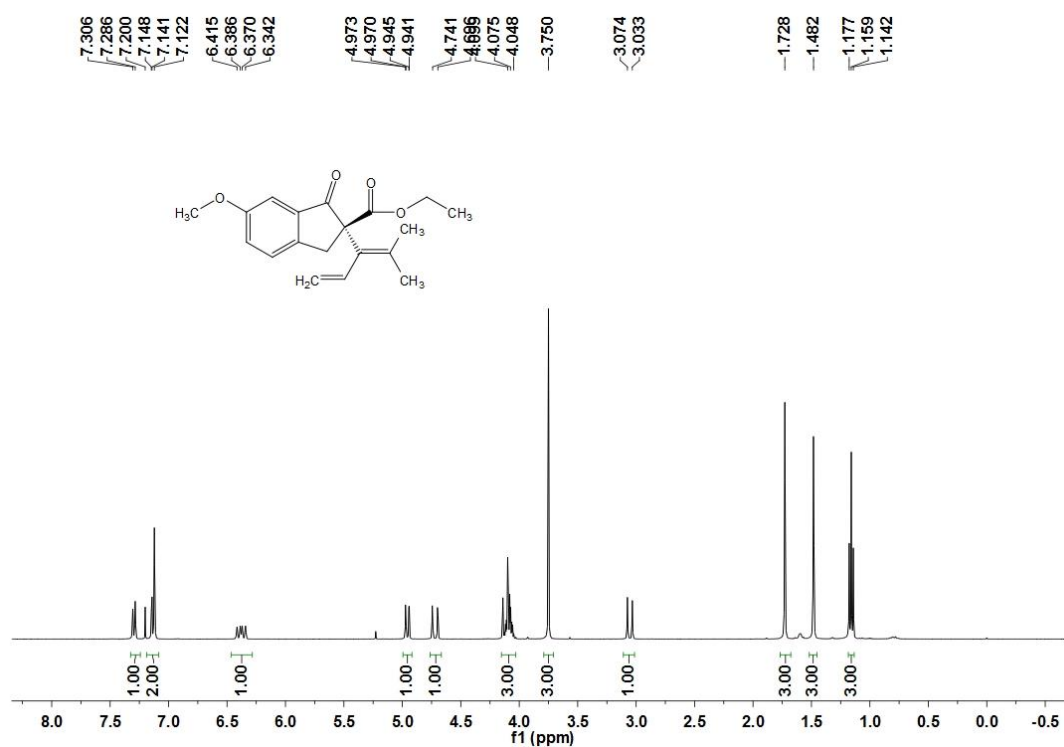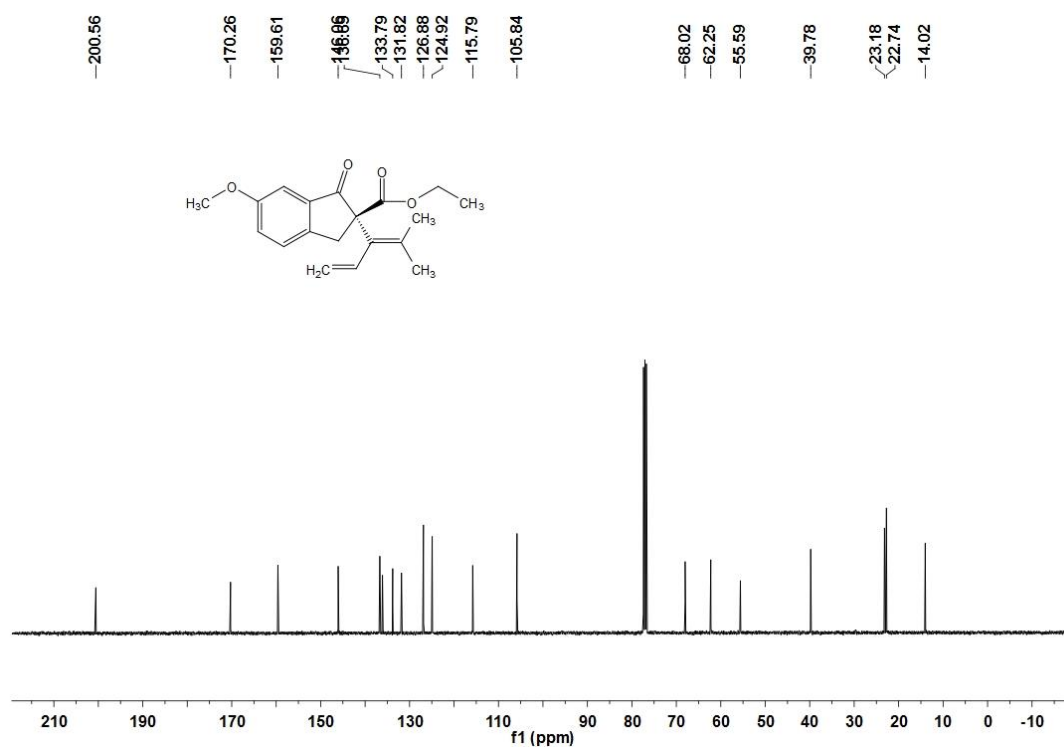

21

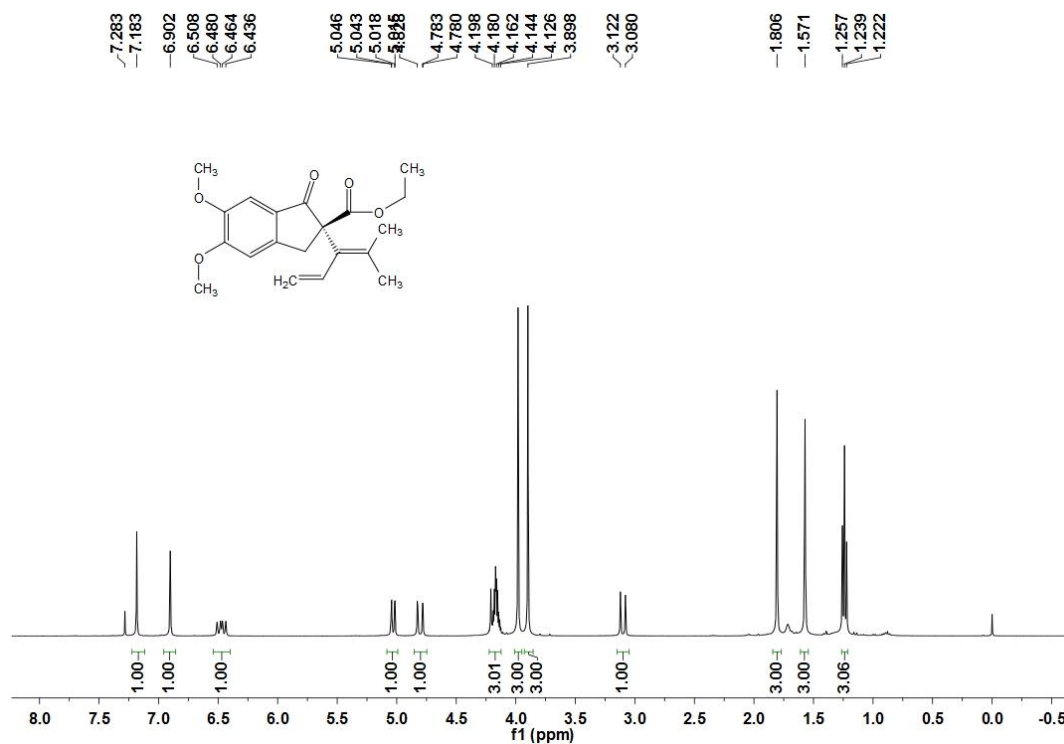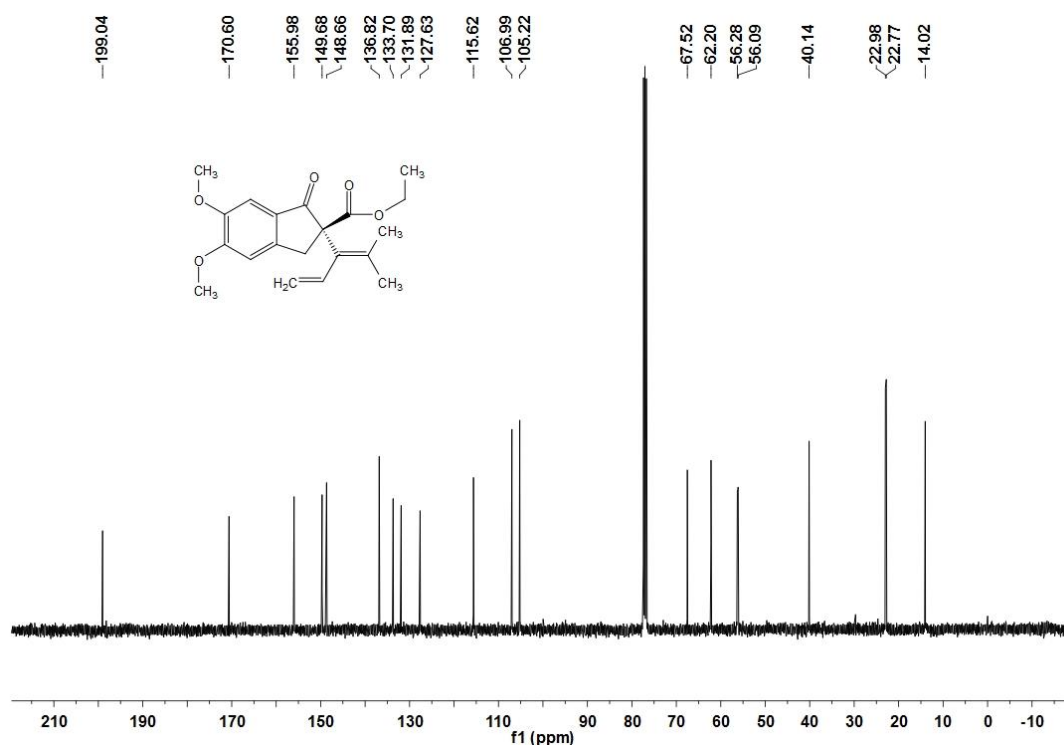

2m

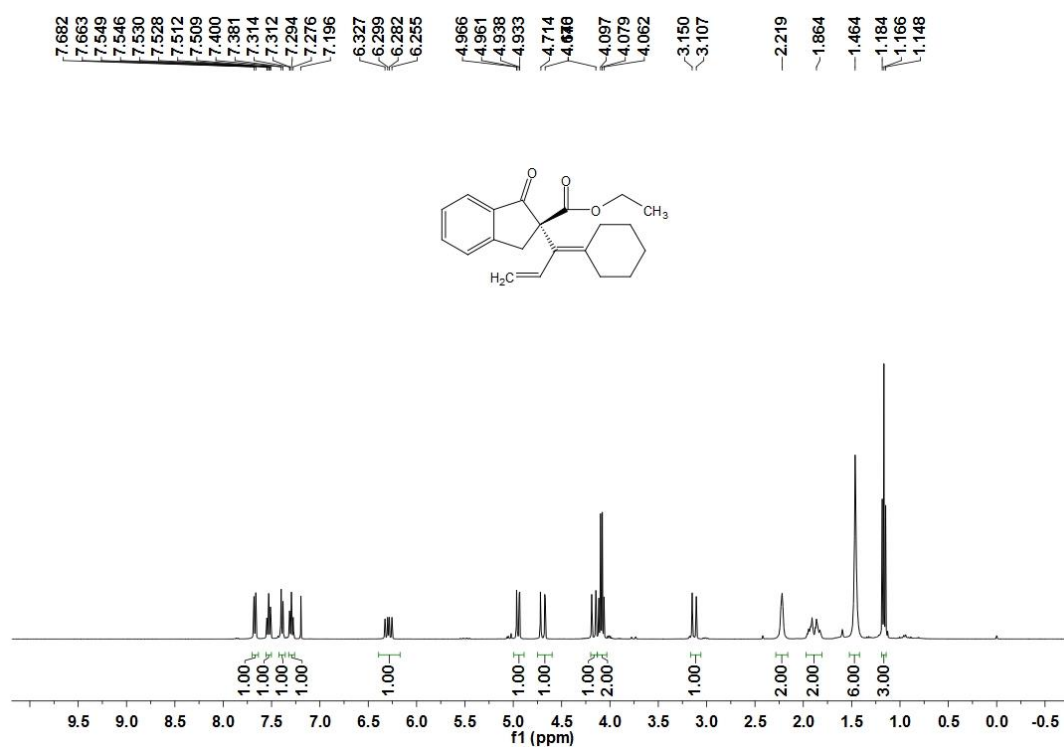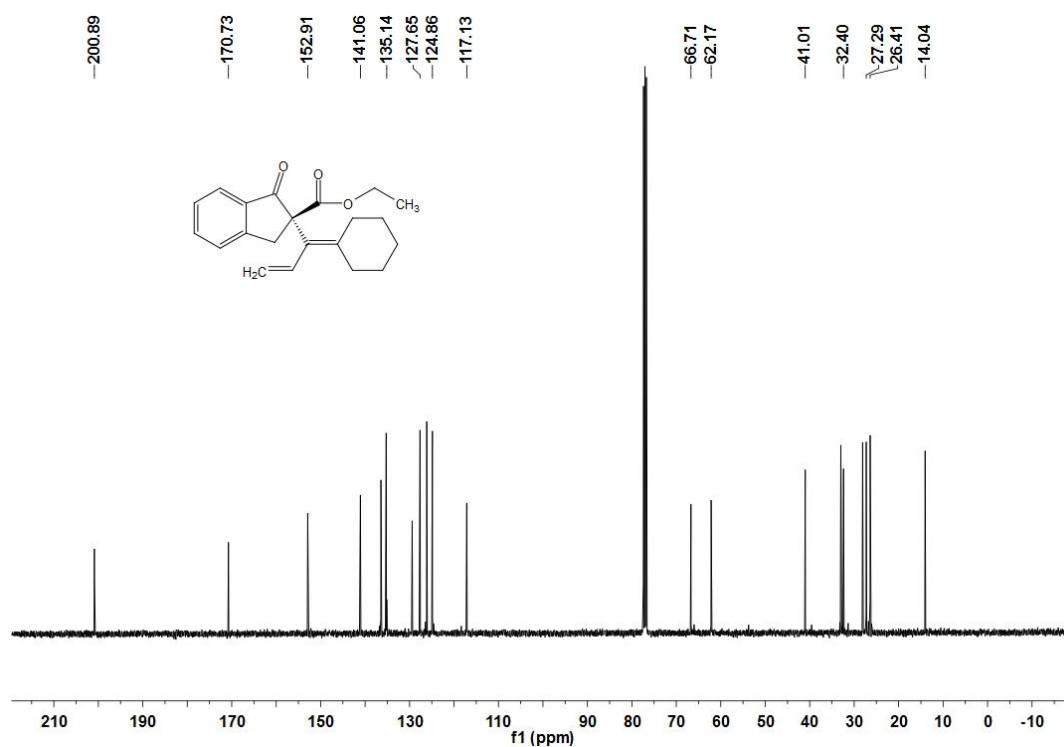

2n

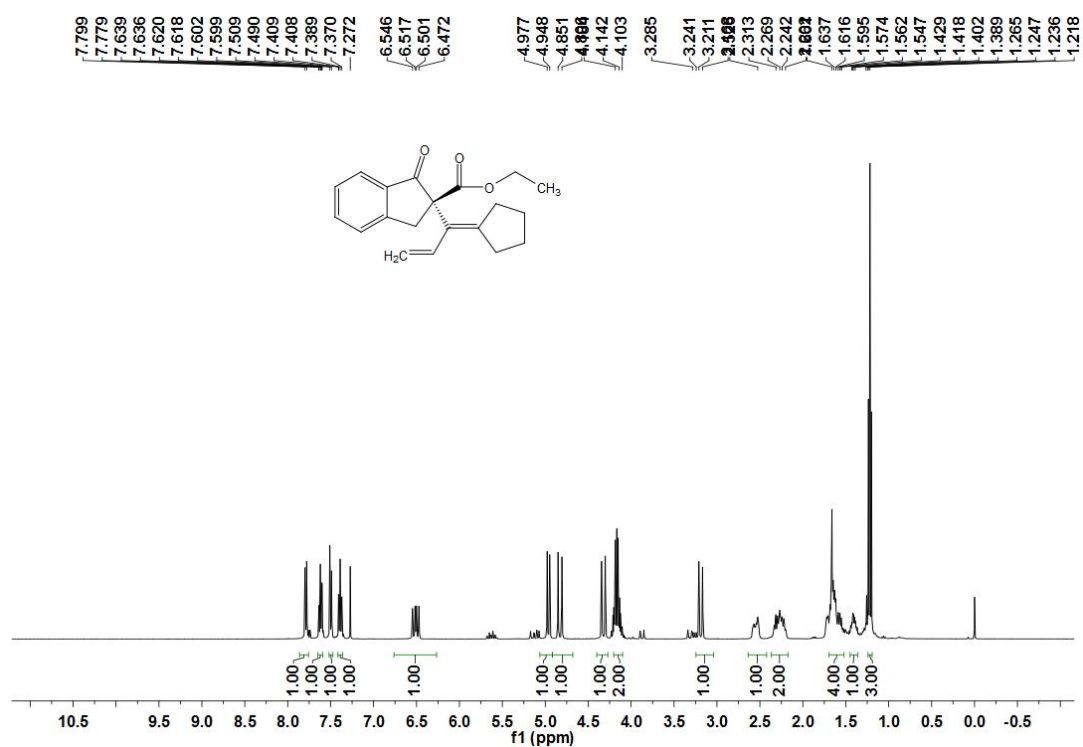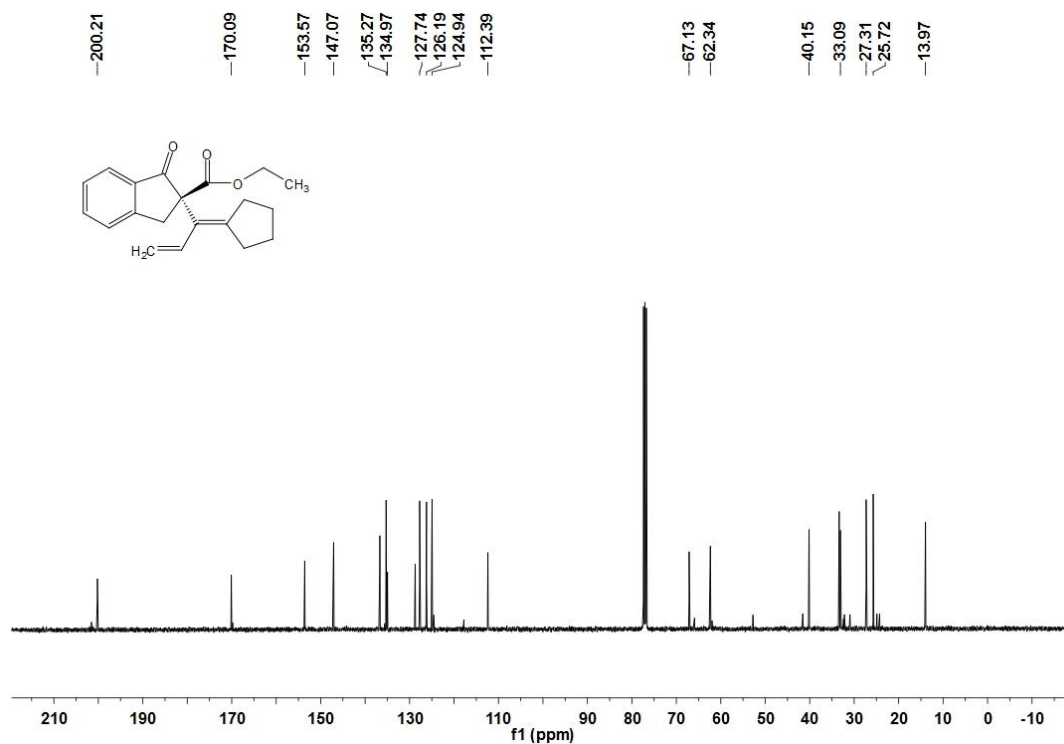

20

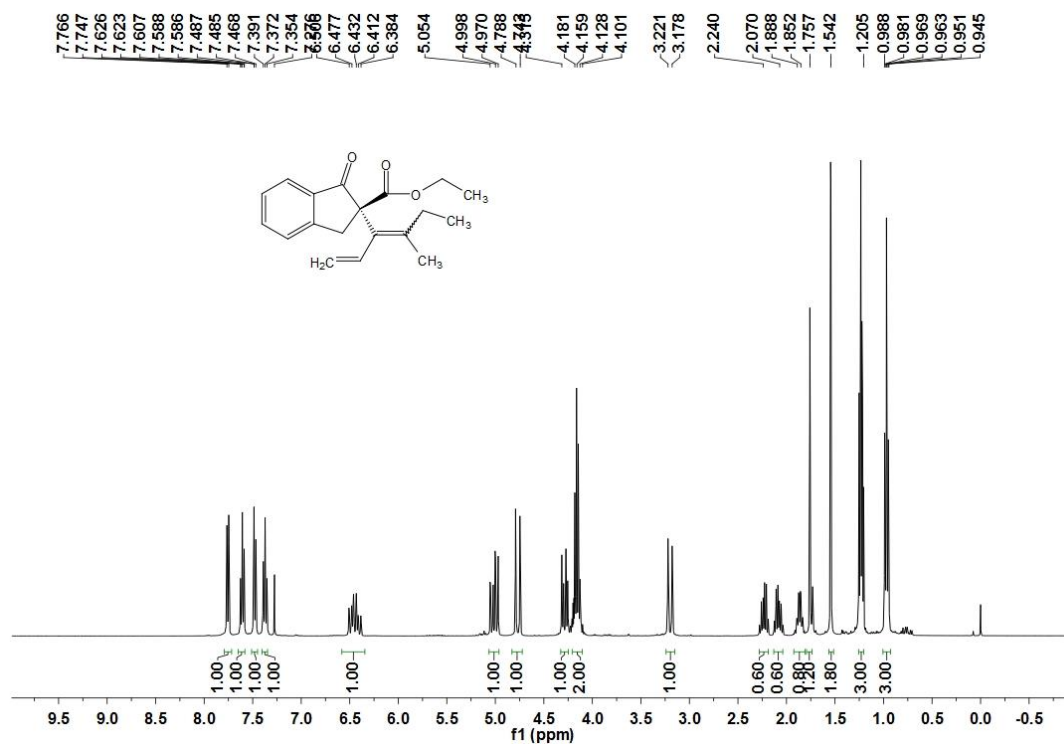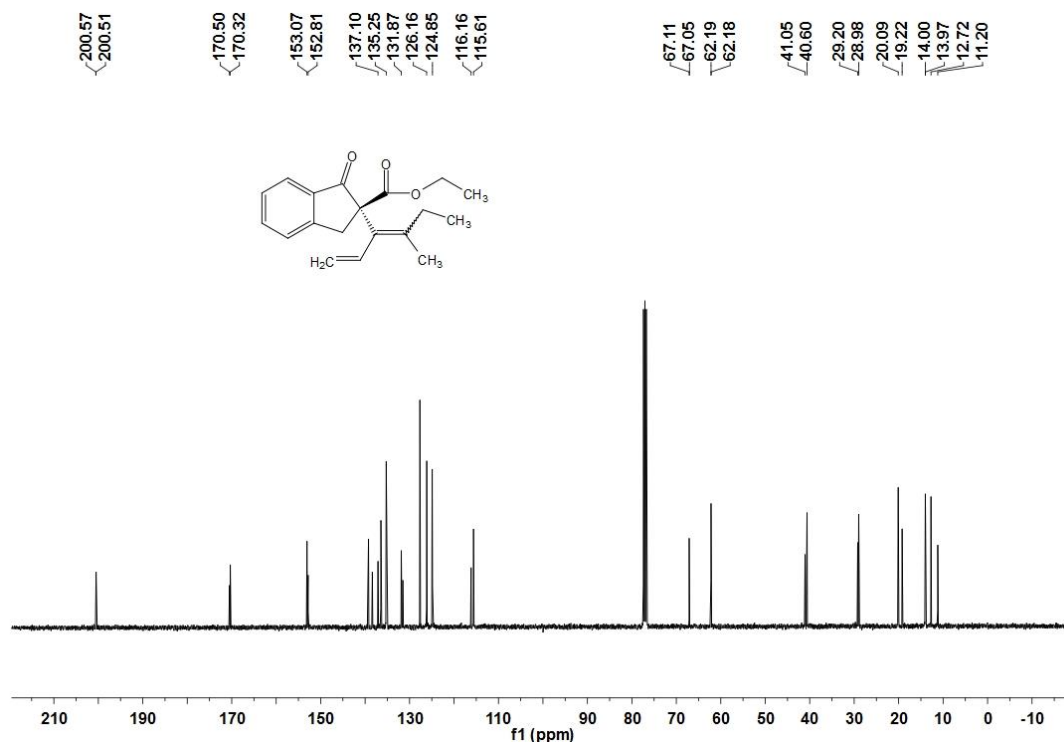

2p

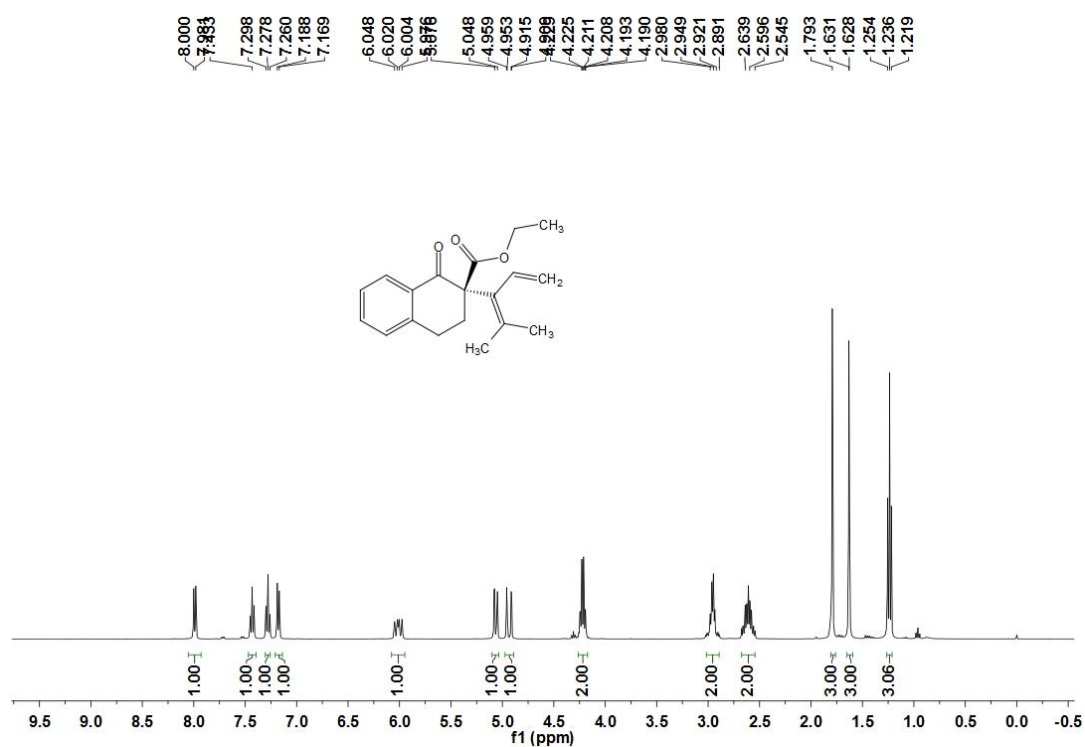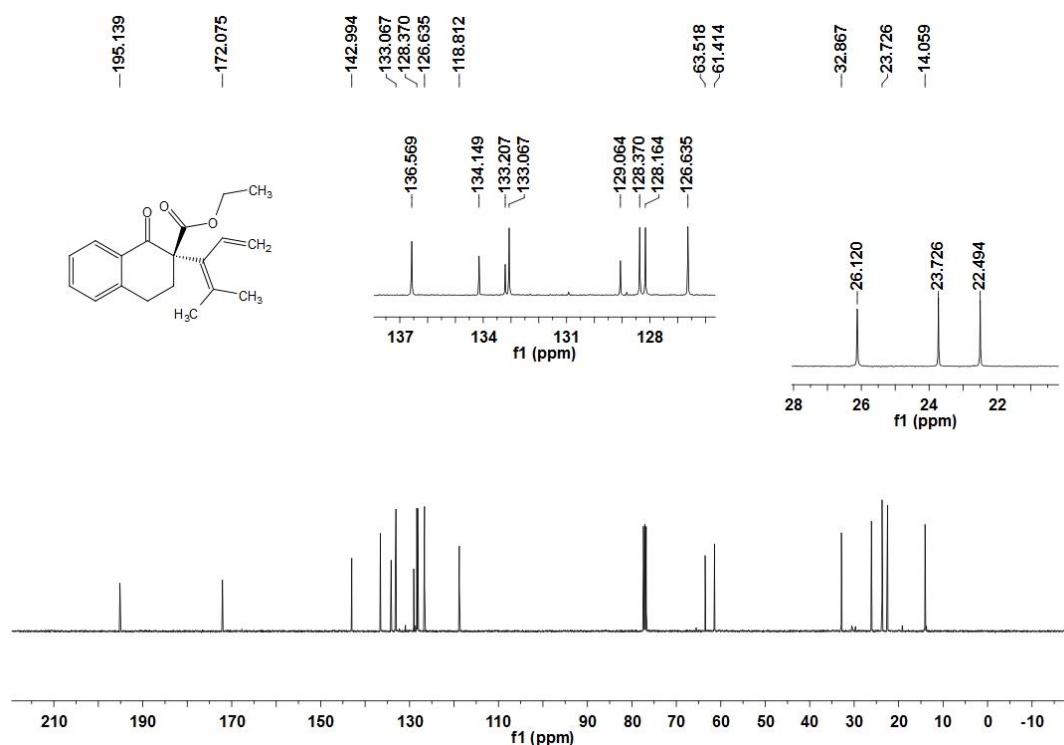



2q

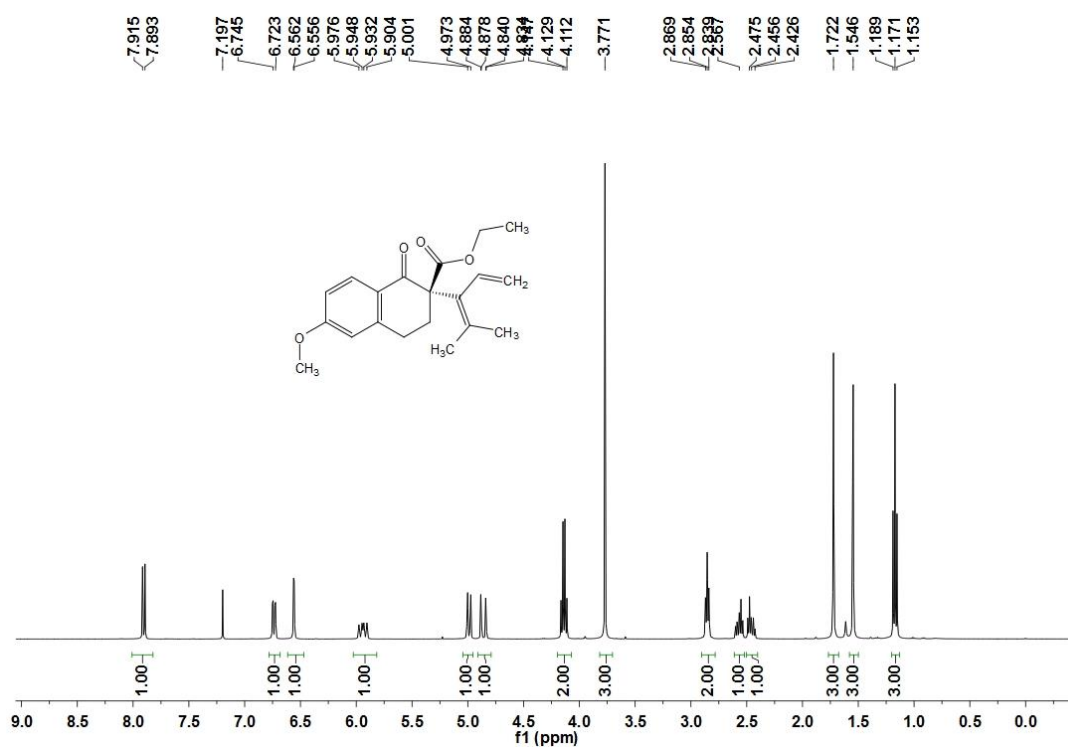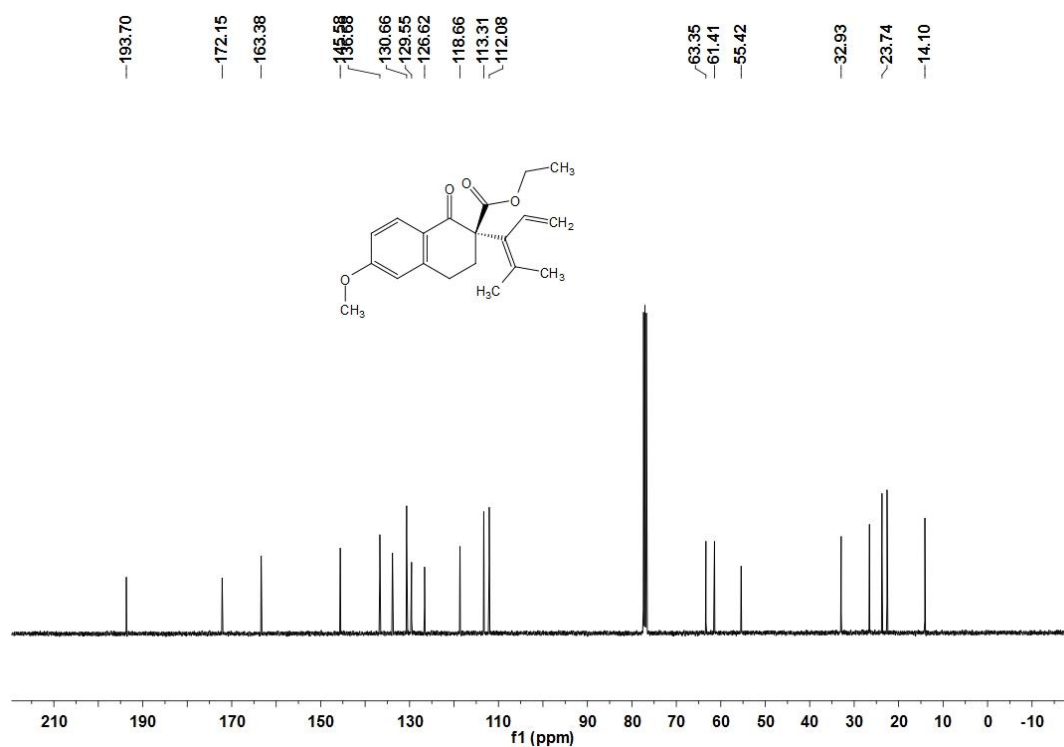

2r

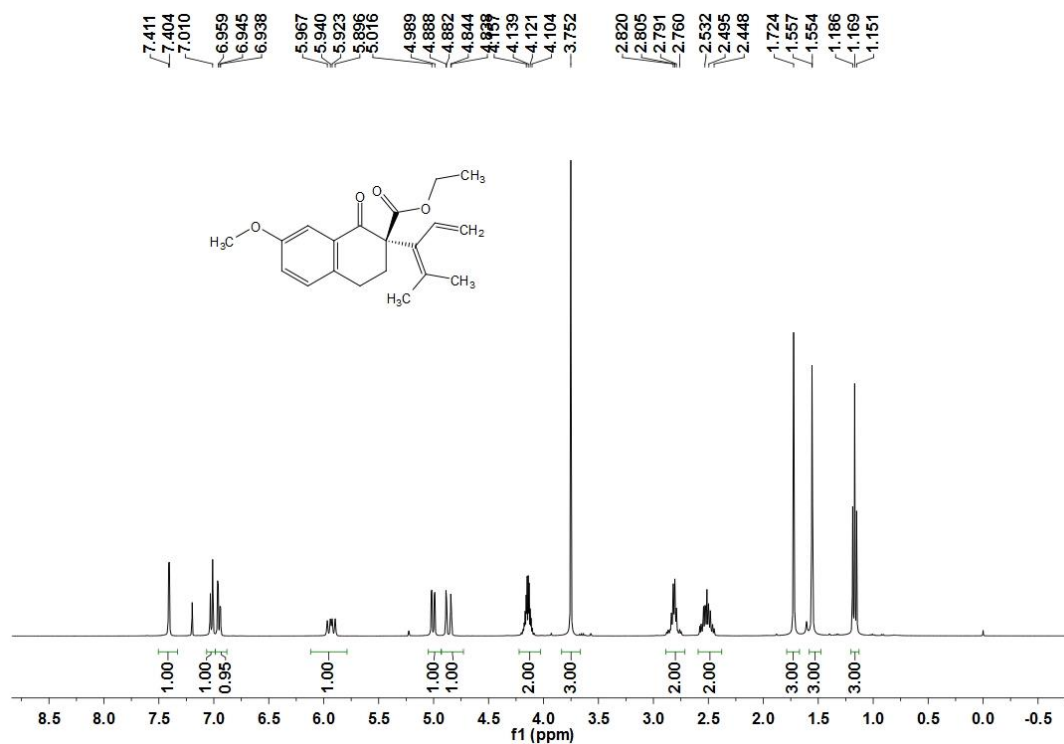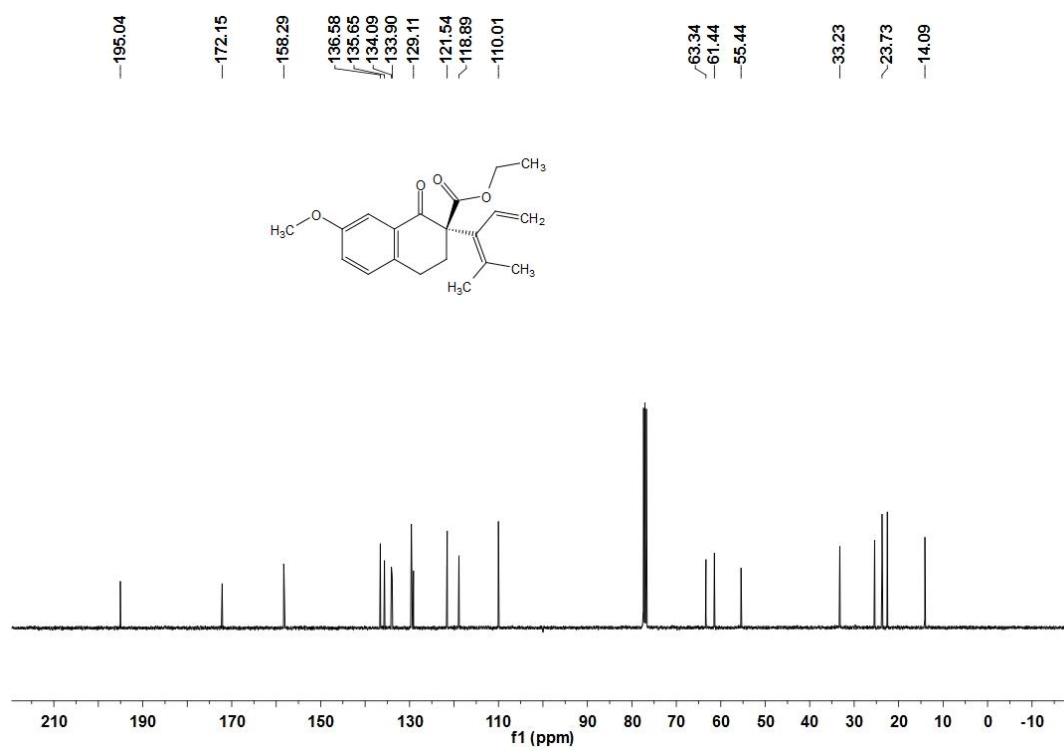

2s

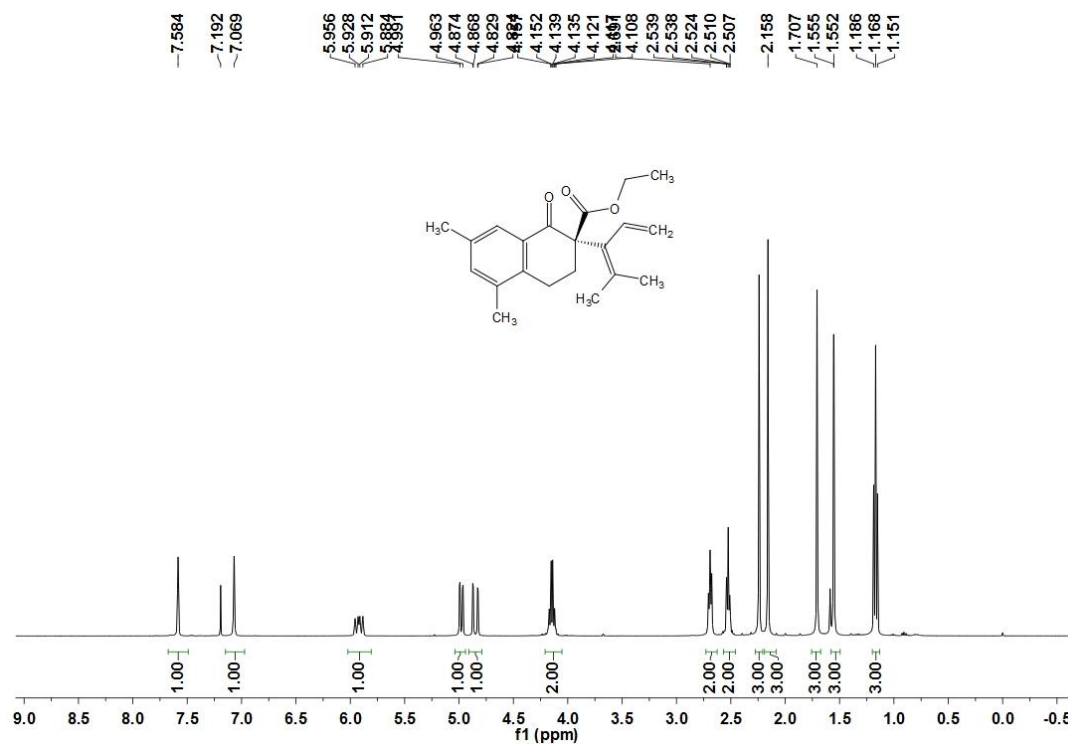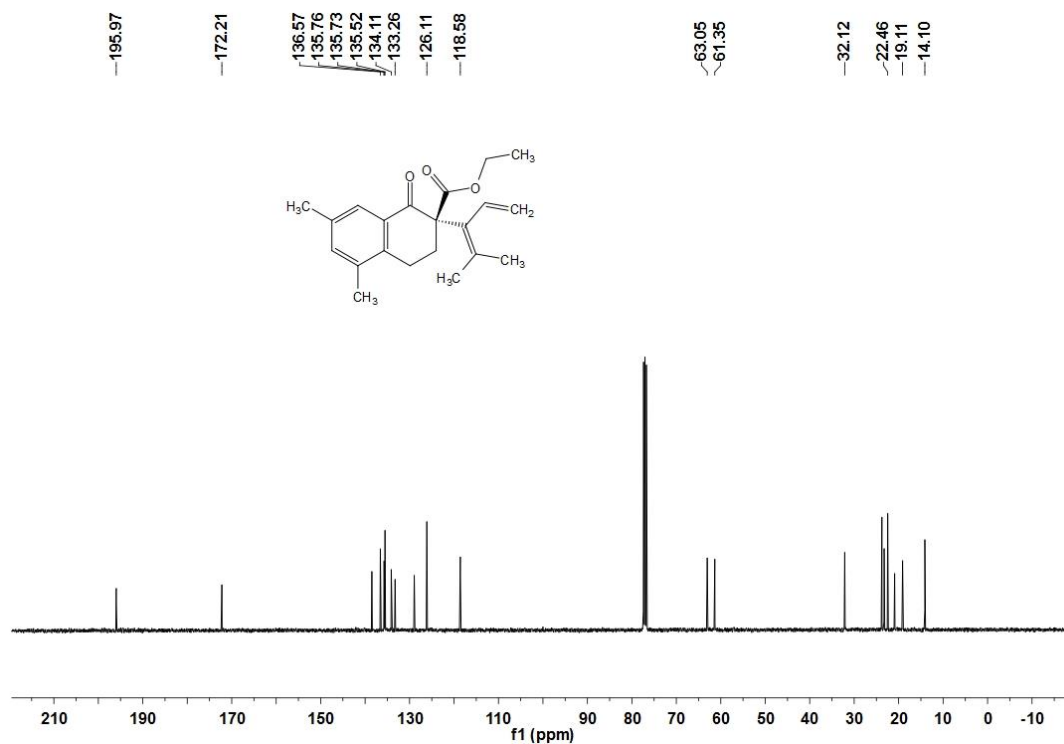

2t

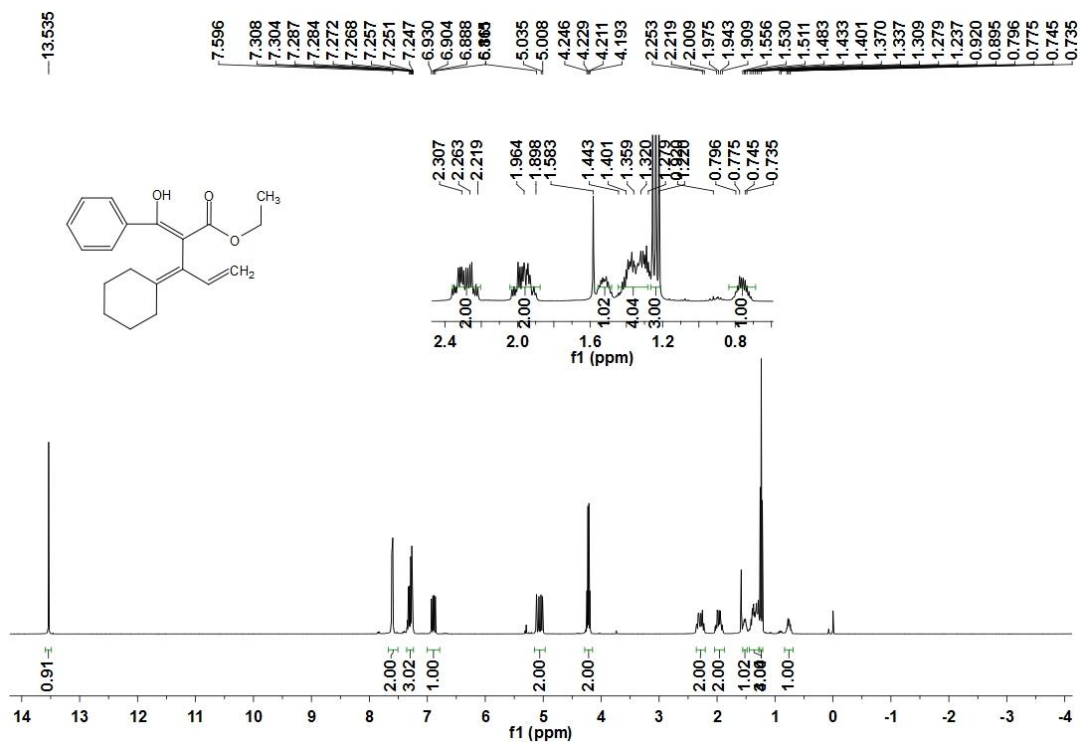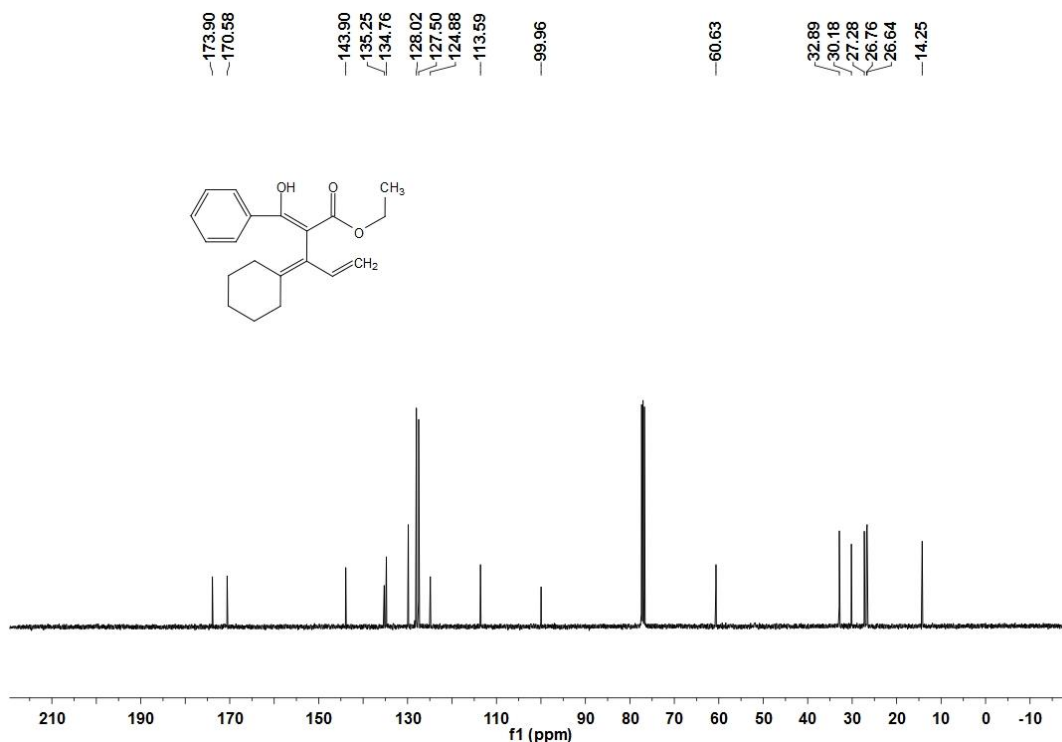

3

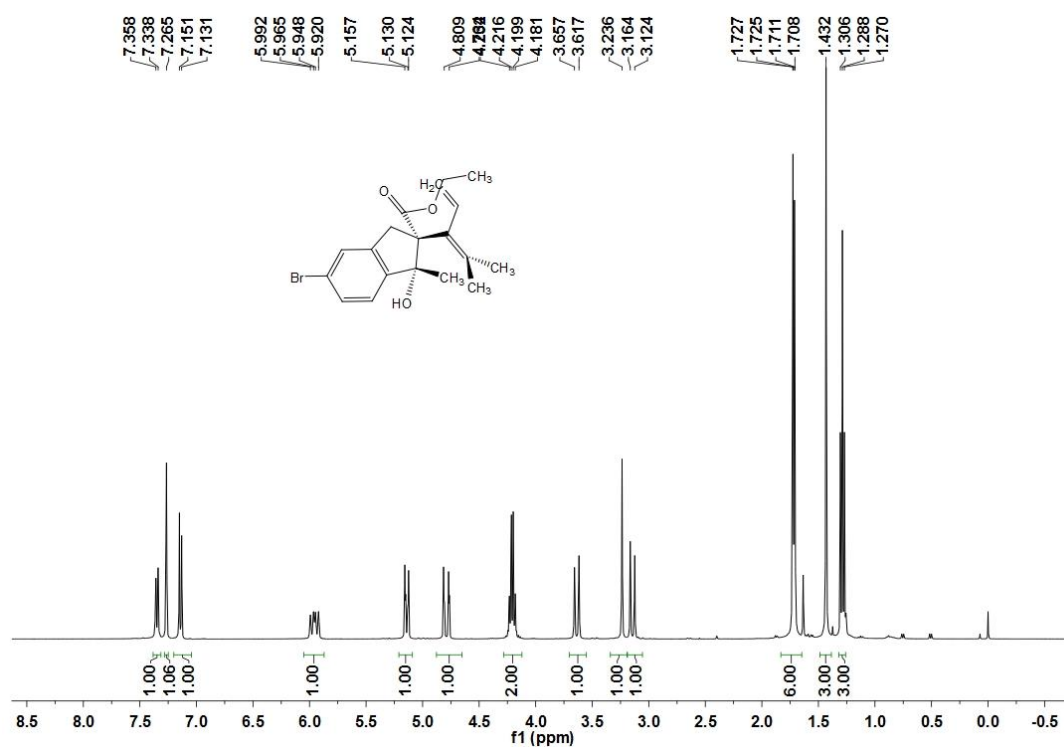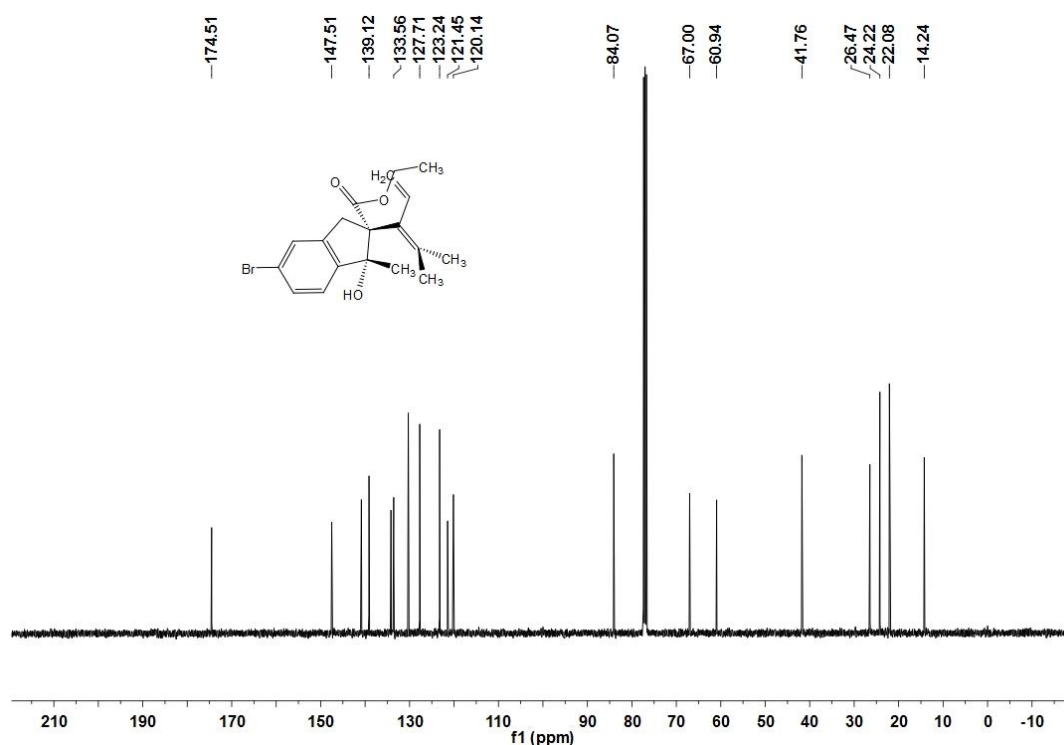

**E-4**

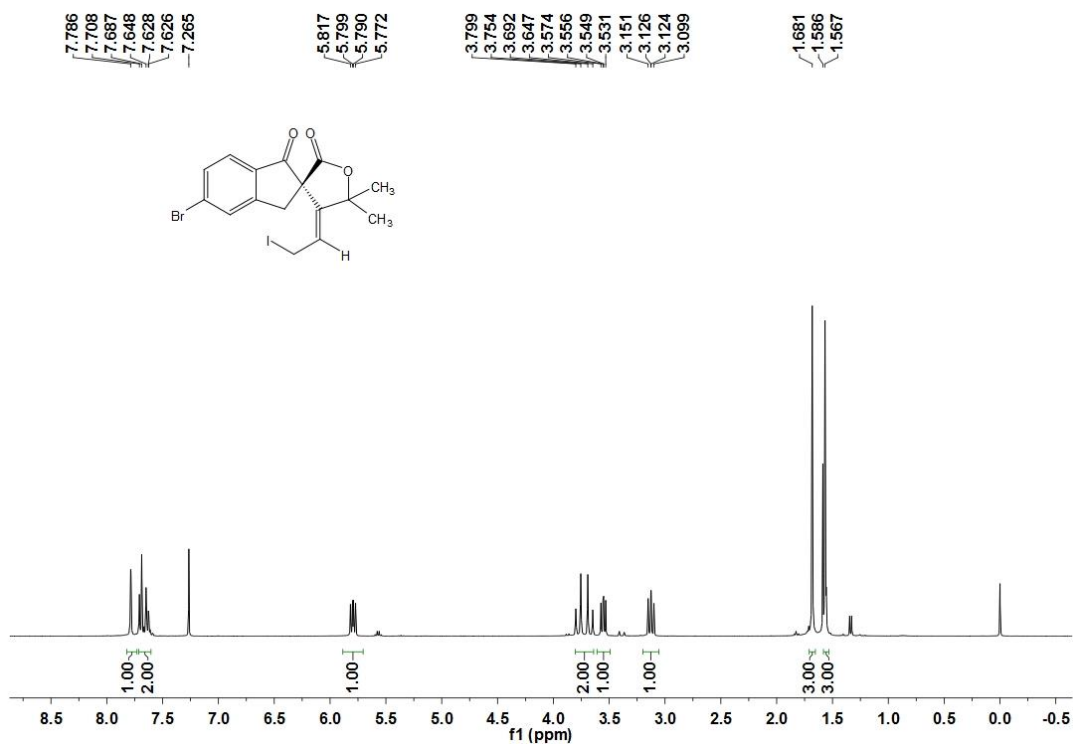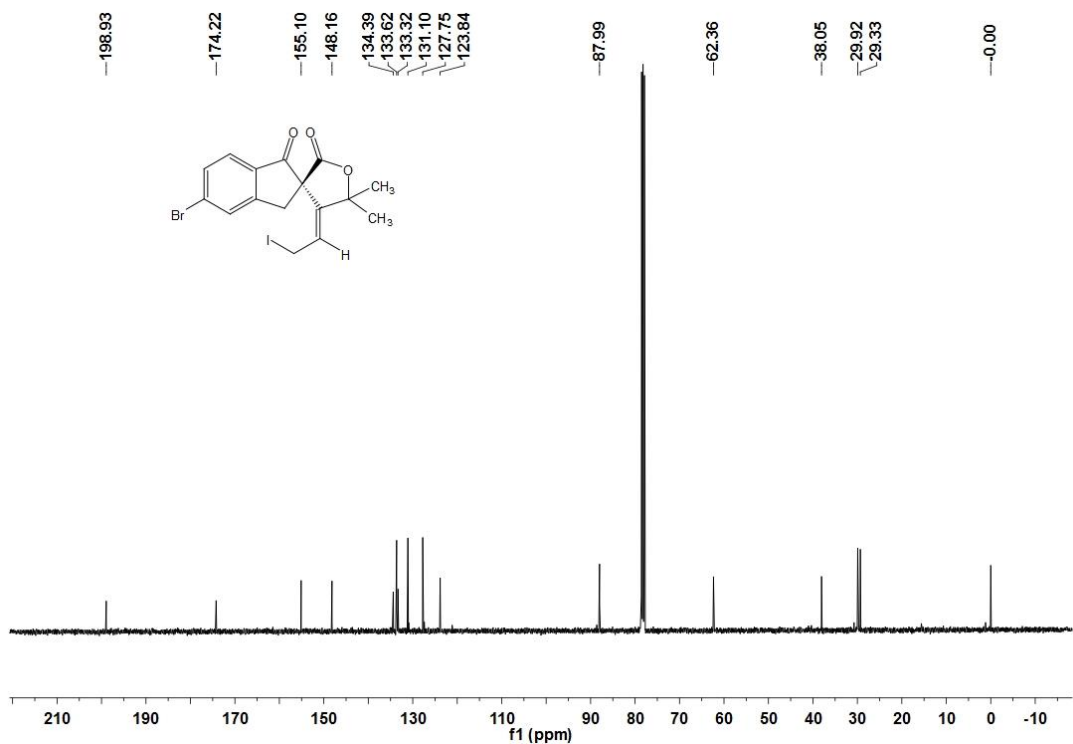

5

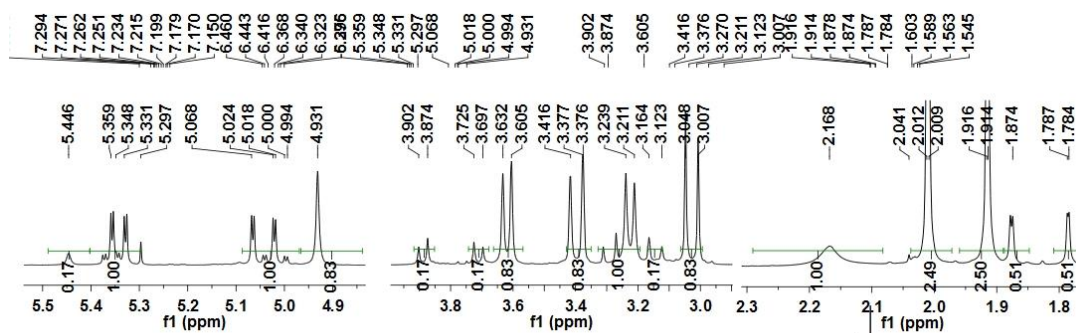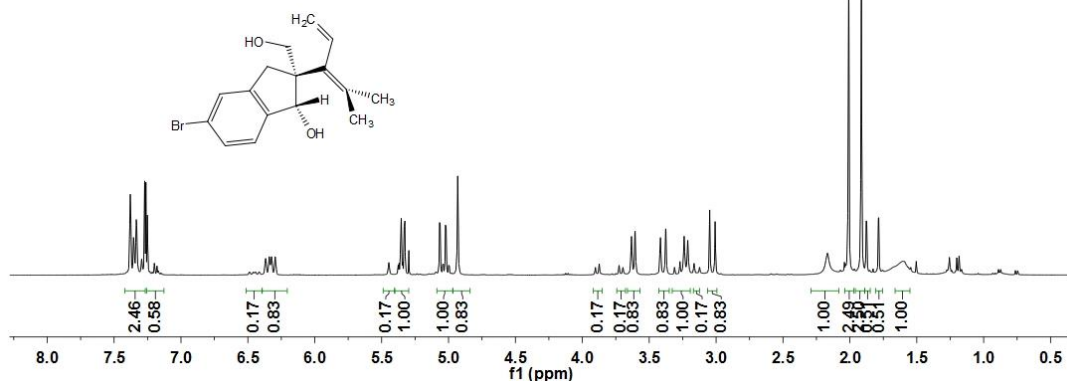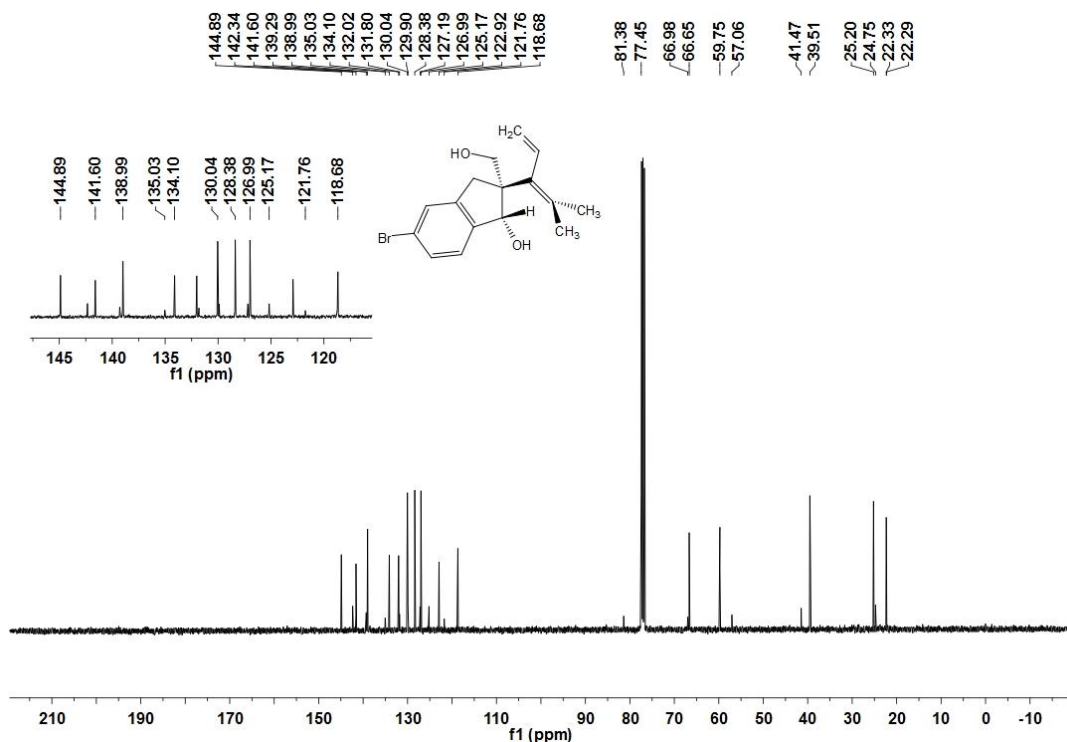

Supplement: c6cc06481g1.pdf [file c6cc06481g1.pdf]
